# Supplementary material for: Correction: When SF 5 outplays CF 3 : effects of pentafluorosulfanyl decorated scorpionates on copper
Source: Royal Society of Chemistry journal article supplement (doi:10.1039/d3sc90243a), 2023-12-22
Supplement: d3sc90243a1.pdf [file d3sc90243a1.pdf]

Supporting Information

## When SF<sub>5</sub> outplays CF<sub>3</sub>: Effects of pentafluorosulfanyl decorated scorpionates on copper

Anurag Noonikara-Poyil,<sup>[1]</sup> Alvaro Muñoz-Castro,<sup>[2]</sup> Andrii Boretskyi,<sup>[3]</sup>

Pavel K. Mykhailiuk,<sup>[4,5]</sup> \* H. V. Rasika Dias<sup>[1],\*</sup>

### Affiliations:

[1] Department of Chemistry and Biochemistry, The University of Texas at Arlington, Arlington, Texas 76019, USA

E-mail: [dias@uta.edu](mailto:dias@uta.edu).

[2] Grupo de Química Inorgánica y Materiales Moleculares, Facultad de Ingeniería, Universidad Autónoma de Chile, El Llano Subercaseaux 2801, Santiago, Chile

[3] UORSY, Ukrorgsyntez Ltd, PO Box 59, 02002 Kyiv, Ukraine

[4] Enamine Ltd., Chervonotkatska 78, 02094 Kyiv, Ukraine

[5] Chemistry Department, Taras Shevchenko National University of Kyiv Volodymyrska 64, 01601 Kyiv, Ukraine

E-mail: [Pavel.Mykhailiuk@gmail.com](mailto:Pavel.Mykhailiuk@gmail.com).

## Table of Contents

|                                                                                           |      |
|-------------------------------------------------------------------------------------------|------|
| General Information .....                                                                 | S-2  |
| Table for spectroscopic comparison .....                                                  | S-3  |
| Synthesis and characterization of Compounds .....                                         | S-4  |
| Cyclopropanation .....                                                                    | S-11 |
| <sup>1</sup> H, <sup>13</sup> C, <sup>19</sup> F NMR and Raman Spectra of Compounds ..... | S-12 |
| X-ray Data Collection and Structure Determinations .....                                  | S-30 |
| Steric Maps .....                                                                         | S-54 |
| Computational studies .....                                                               | S-56 |
| References .....                                                                          | S-64 |

## General Information

Solvents were purchased from commercial sources, purified before use. NMR spectra were recorded at 25 °C on a JEOL Eclipse 500 and JEOL Eclipse 400 spectrometers ( $^1\text{H}$ , 500.16 and 399.78 MHz  $^{13}\text{C}$ , 125.78 and 100.52 MHz, and  $^{19}\text{F}$ , 470.62 and 376.17 MHz) or a Varian 400 MHz spectrometer ( $^1\text{H}$ , 399.97 MHz  $^{13}\text{C}$ , 100.61 MHz, and  $^{19}\text{F}$ , 376.50 MHz).  $^1\text{H}$  and  $^{13}\text{C}$  NMR spectra are referenced to the solvent peak ( $^1\text{H}$ ;  $\text{CDCl}_3$   $\delta$  7.26,  $(\text{CD}_3)_2\text{SO}$   $\delta$  2.50,  $(\text{CD}_3)_2\text{CO}$   $\delta$  2.05  $^{13}\text{C}$ ;  $\text{CDCl}_3$   $\delta$  77.16,  $(\text{CD}_3)_2\text{SO}$   $\delta$  39.52,  $(\text{CD}_3)_2\text{CO}$   $\delta$  29.8).  $^1\text{H}$  NMR coupling constants (J) are reported in Hertz (Hz) and multiplicities are indicated as follows: s (singlet), d (doublet), t (triplet), pent (pentet), m (multiplet), dd (doublet of doublet), pd (pentet of doublet).  $^{19}\text{F}$  NMR values were referenced to external  $\text{CFCl}_3$ . Melting points were obtained on a Mel-Temp II apparatus and were not corrected. Elemental analyses were performed using a Perkin-Elmer Model 2400 CHN analyzer. IR spectra were collected at room temperature on a Shimadzu IR Prestige-21 FTIR containing an ATR attachment using pure liquid or solid materials, with instrument resolution at  $2\text{ cm}^{-1}$ . Raman data were collected on a Thermo Scientific DXR3 Raman microscope with a HeNe laser source of 633 nm, by placing pure solid materials on a glass slide. 2-Diazo-1,1,1-trifluoroethane was synthesized as previously reported.<sup>1</sup> All other reactants and reagents were purchased from commercial sources or obtained as noted below. Heating was accomplished by either a heating mantle or a silicone oil bath.

CAUTION: Thallium compounds are toxic. Care must be taken when manipulating thallium containing materials.

**Table S1.** Selected NMR and vibrational spectroscopic data of ethylene and carbon monoxide complexes.

|   | <b>Compound</b>                                                                             | <b>Raman/IR<br/>(cm<sup>-1</sup>)<br/>(C=C/C≡O)</b> | <b><sup>1</sup>H NMR<br/>(ppm) (C<sub>2</sub>H<sub>4</sub>)</b> | <b><sup>13</sup>C{<sup>1</sup>H} NMR<br/>(ppm) (C=C/<br/>C≡O)</b> | <b>Reference</b> |
|---|---------------------------------------------------------------------------------------------|-----------------------------------------------------|-----------------------------------------------------------------|-------------------------------------------------------------------|------------------|
| 1 | [Ph <sub>2</sub> B(3-(SF <sub>5</sub> )Pz) <sub>2</sub> ]Cu(C <sub>2</sub> H <sub>4</sub> ) |                                                     | 3.72                                                            | 86.4                                                              | This work        |
| 2 | [Ph <sub>2</sub> B(3-(CF <sub>3</sub> )Pz) <sub>2</sub> ]Cu(C <sub>2</sub> H <sub>4</sub> ) |                                                     | 3.69                                                            | 82.7                                                              | This work        |
| 3 | [Ph <sub>2</sub> B(3-(SF <sub>5</sub> )Pz) <sub>2</sub> ]Cu(CO)                             | 2121                                                | -                                                               | 170.6                                                             | This work        |
| 4 | [Ph <sub>2</sub> B(3-(CF <sub>3</sub> )Pz) <sub>2</sub> ]Cu(CO)                             | 2117                                                | -                                                               | 171.3                                                             | This work        |
| 5 | Free CO                                                                                     | 2143                                                | -                                                               | 184.0                                                             | <sup>2</sup>     |

## Synthesis and Characterization of Compounds

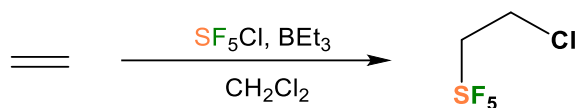

**(2-Chloroethyl)pentafluoro- $\lambda^6$ -sulfane:** A 3-necked 2 L reactor was charged with 500 mL of  $\text{CH}_2\text{Cl}_2$  and cooled to  $-90\text{ }^\circ\text{C}$ . Then ethylene ( $\sim 20\text{ g}$ ,  $0.714\text{ mol}$ ,  $1.2\text{ equiv}$ ) and  $\text{SF}_5\text{Cl}$  ( $95\text{ g}$ ,  $0.585\text{ mol}$ ,  $1.0\text{ equiv}$ ; obtained according to the previous report<sup>3</sup>) were condensed to the reactor.  $\text{Et}_3\text{B}$  ( $20\text{ mL}$ ,  $1.0\text{ M}$  in hexanes) was added at  $-90\text{ }^\circ\text{C}$ , and the mixture was allowed to slowly warm up by passing a weak current of ethylene through the solution. When the temperature reached  $-50\text{ }^\circ\text{C}$ , an additional portion of  $\text{Et}_3\text{B}$  ( $10\text{ mL}$ ,  $1.0\text{ M}$  in hexanes) was added, and the current of ethylene was stopped. The mixture was allowed to warm to room temperature. The solution was washed with cold water (with ice), dried, and distilled at atmospheric pressure using a rectification column. The product was obtained with impurities of methylene chloride and 1,2-dichloroethane. Yield:  $130\text{ g}$  of crude,  $\sim 50\%$  purity,  $58\%$ , colorless oil.  $^1\text{H NMR}$  ( $500\text{ MHz}$ ,  $\text{CDCl}_3$ ):  $\delta$  (ppm)  $5.37 - 5.24$  (m,  $2\text{H}$ ),  $4.01 - 3.98$  (m,  $2\text{H}$ ).  $^{19}\text{F}\{^1\text{H}\}$  NMR ( $470\text{ MHz}$ ,  $\text{CDCl}_3$ ):  $\delta$  (ppm)  $81.8$  (pent,  $^2J_{\text{FF}} = 147\text{ Hz}$ ,  $1\text{F}$ ),  $65.3$  (d,  $^2J_{\text{FF}} = 146$ ,  $4\text{F}$ ).

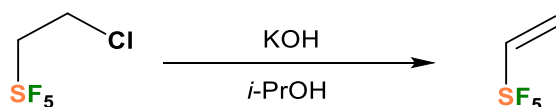

**Pentafluoro(vinyl)- $\lambda^6$ -sulfane (4):** A  $500\text{ mL}$  round bottom flask was charged with a solution of  $40\%$   $\text{KOH}$  ( $100\text{ mL}$ ) and a solution of crude (2-chloroethyl)pentafluoro- $\lambda^6$ -sulfane ( $40\text{ g}$ ) in  $60\text{ mL}$  of isopropanol. A distillation column was attached to the flask, and the mixture was heated up to boiling ( $\sim 60\text{ }^\circ\text{C}$  oil bath temperature). As the product was distilled off, the temperature was increased to  $100\text{ }^\circ\text{C}$ . The distillate can be used for the next step, despite the possible impurity of methylene. If water gets into the product during distillation, additional washing with water and drying will be needed. Yield:  $25\text{ g}$  of crude,  $\sim 70\%$  purity,  $99\%$ , colorless oil.  $^1\text{H NMR}$  ( $400\text{ MHz}$ ,  $\text{CDCl}_3$ ):  $\delta$  (ppm)  $6.77 - 6.59$  (m,  $1\text{H}$ ),  $6.02$  (d,  $J = 16.0\text{ Hz}$ ,  $1\text{H}$ ),  $5.84 - 5.68$  (m,  $1\text{H}$ ).  $^{19}\text{F}\{^1\text{H}\}$  NMR ( $376\text{ MHz}$ ,  $\text{CDCl}_3$ ):  $\delta$  (ppm)  $81.2$  (pent,  $^2J_{\text{FF}} = 151\text{ Hz}$ ,  $1\text{F}$ ),  $59.6$  (d,  $^2J_{\text{FF}} = 150\text{ Hz}$ ,  $4\text{F}$ ).

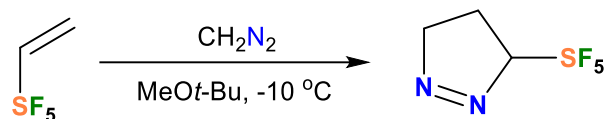

**5-(Pentafluoro- $\lambda^6$ -sulfanyl)-4,5-dihydro-3H-pyrazole (5):** Crude pentafluoro(vinyl)- $\lambda^6$ -sulfane (30 g, 0.136 mol, 1.0 equiv) was dissolved in MTBE (150 mL) and a solution of diazomethane (freshly prepared, 6.3 g, 0.15 mol, 1.1 equiv) in MTBE (50 mL) was added at  $-10\text{ }^\circ\text{C}$ . The color of diazomethane disappeared after 30 min, and the mixture was warmed up to a room temperature. The mixture was concentrated under reduced pressure. Yield: 22.7 g, 85%, yellow oil (ca. 80% purity).  $^1\text{H}$  NMR (500 MHz,  $\text{CDCl}_3$ ):  $\delta$  7.34 (br,  $\text{SCHN}$  is overlapped with  $\text{CHCl}_3$  signal), 4.63 (d,  $J = 11.8$  Hz, 1H), 4.54 (d,  $J = 11.8$  Hz, 1H), 4.39 – 4.29 (m, 1H), 3.70 – 3.55 (m, 1H).  $^{19}\text{F}\{^1\text{H}\}$  NMR (376 MHz,  $\text{CDCl}_3$ ):  $\delta$  (ppm) 79.2 (pent,  $^2J_{\text{FF}} = 148$  Hz, 1F), 57.6 (d,  $^2J_{\text{FF}} = 147$  Hz, 4F).

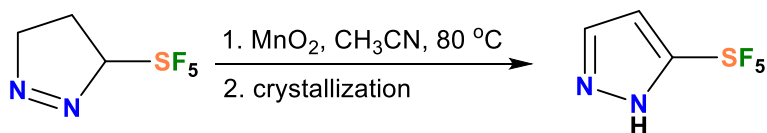

**5-(Pentafluoro- $\lambda^6$ -sulfanyl)-1H-pyrazole (1):** To a solution of 5-(pentafluoro- $\lambda^6$ -sulfanyl)-4,5-dihydro-3H-pyrazole (30 g, 0.15 mol, 1.0 equiv) in  $\text{CH}_3\text{CN}$  (500 mL) was added  $\text{MnO}_2$  (60 g, 0.69 mol, 4.6 equiv). The mixture was heated to  $80\text{ }^\circ\text{C}$  in oil bath with a thermocouple and stirred at this temperature for 16 h. The mixture was filtered through a thick layer of silica gel. The filtrate was concentrated under reduced pressure and dissolved in a 1M  $\text{NaOH}$  solution (150 mL), then the mixture was acidified with 3M  $\text{HCl}$ . The product was extracted with  $\text{CHCl}_3$  ( $3 \times 100$  mL), concentrated, recrystallized from hexane and dried. Yield: 11.5 g, 38%, white solid, m.p. =  $115\text{--}116\text{ }^\circ\text{C}$ .  $^1\text{H}$  NMR (400 MHz,  $\text{CDCl}_3$ ):  $\delta$  (ppm) 12.04 (br s, 1H,  $\text{NH}$ ), 7.70 (d,  $^3J_{\text{HH}} = 1.0$  Hz, 1H,  $\text{CHN}$ ), 6.68 (d,  $^3J_{\text{HH}} = 2.5$  Hz, 1H,  $\text{CHC}$ ).  $^{13}\text{C}\{^1\text{H}\}$  NMR (100 MHz,  $\text{CDCl}_3$ ):  $\delta$  (ppm) 159.8 (pent,  $^2J_{\text{FC}} = 25$  Hz,  $\text{CSF}_5$ ), 130.4 ( $\text{CHN}$ ), 104.1 (br m,  $\text{CHC}$ ).  $^{19}\text{F}\{^1\text{H}\}$  NMR (376 MHz,  $\text{CDCl}_3$ ):  $\delta$  (ppm) 79.9 (pent,  $^2J_{\text{FF}} = 152$  Hz, 1F), 63.5 (d,  $^2J_{\text{FF}} = 152$  Hz, 4F). LCMS ( $\text{M}+\text{H}$ ) $^+$ : 195. HRMS (ESI-TOF)  $m/z$ : [ $\text{M} + \text{H}$ ] $^+$  calcd for  $\text{C}_3\text{H}_4\text{F}_5\text{N}_2\text{S}$  195.0015; found 195.0002.

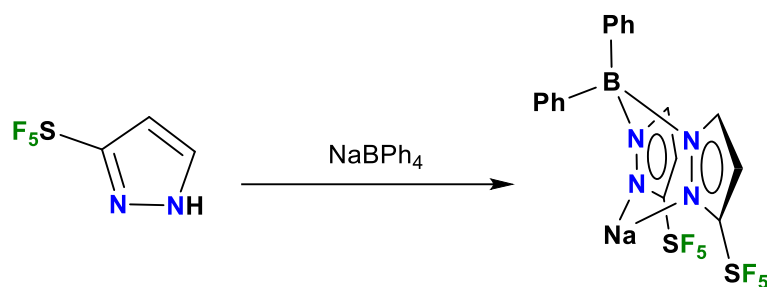

**[Ph<sub>2</sub>B(3-(SF<sub>5</sub>)Pz)<sub>2</sub>]Na:** 5-(Pentafluoro-λ<sup>6</sup>-sulfanyl)-1H-pyrazole (**1**) (0.20 g, 1.03 mmol) and NaBPh<sub>4</sub> (0.12 g, 0.34 mmol) were mixed in a high pressure tube and heated at 180 °C for 4 h. The reaction mixture was cooled to room temperature and washed with hexanes (3 X 5 mL). The solid was dried under vacuum to get pale orange solid. Yield: 50%. M.P.: 195-198 °C (decomposition). <sup>1</sup>H NMR ((CD<sub>3</sub>)<sub>2</sub>CO): δ (ppm) 7.93 (br, 2H, PzH), 7.79-7.30 (m, 6H, PhH), 7.17-7.05 (m, 4H, PhH), 6.70 (d, *J* = 2.3 Hz, 2H, PzH). <sup>19</sup>F NMR ((CD<sub>3</sub>)<sub>2</sub>CO): δ (ppm) 81.4 (pent, <sup>2</sup>*J*<sub>F-F</sub> = 154.8 Hz, 2F), 63.0 (d, <sup>2</sup>*J*<sub>F-F</sub> = 154.8 Hz, 8F). <sup>13</sup>C {<sup>1</sup>H} NMR ((CD<sub>3</sub>)<sub>2</sub>CO): δ (ppm) 160.5 (br, C-3), 135.6, 134.9, 133.1, 131.8, 131.1, 128.0, 127.3, 103.9 (C-4).

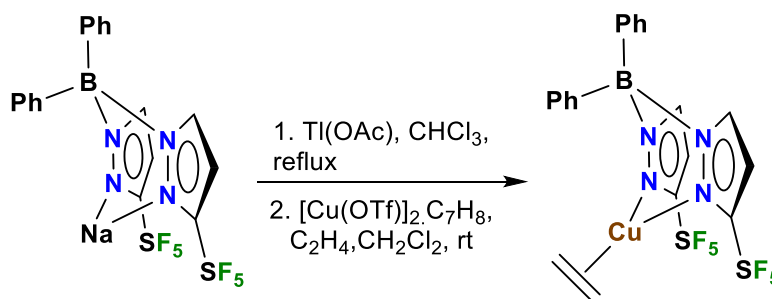

**[Ph<sub>2</sub>B(3-(SF<sub>5</sub>)Pz)<sub>2</sub>]Cu(C<sub>2</sub>H<sub>4</sub>):** [Ph<sub>2</sub>B(3-(SF<sub>5</sub>)Pz)<sub>2</sub>]Na (0.10 g, 0.17 mmol) and Tl(OAc) (0.05 g, 0.19 mmol) were dissolved 5 mL of CHCl<sub>3</sub> in a Schlenk flask and refluxed for 1 h. The reaction mixture was cooled to room temperature and filtered through a pad of celite in a frit funnel. The solvent was evaporated to get the crude product. This crude product is suitable for the synthesis of copper complex. It is possible to remove the impurity, presumably the unreacted sodium salt, by passing the dichloromethane solution of crude material through an alumina column. Dichloromethane from the eluent was evaporated to obtain cleaner the thallium adduct, [Ph<sub>2</sub>B(3-(SF<sub>5</sub>)Pz)<sub>2</sub>]Tl as white powder. Yield: 72%, <sup>1</sup>H NMR (CDCl<sub>3</sub>): δ (ppm) 7.72 (br,

### Supporting Information

2H, PzH), 7.41-7.35 (m, 6H, PhH), 7.06 (br, 4H, PhH), 6.48 (d,  $J = 2.3$  Hz, 2H, PzH).  $^{19}\text{F}$  NMR ( $\text{CDCl}_3$ ):  $\delta$  (ppm) 82.8 (pd,  $^2J_{\text{F-F}} = 154$  Hz,  $^4J_{\text{Tl-F}} = 75.6$  Hz, 2F), 65.5 (dd,  $^4J_{\text{Tl-F}} = 777.3$  Hz,  $^2J_{\text{F-F}} = 154$  Hz, 8F).  $^{13}\text{C}\{^1\text{H}\}$  NMR ( $\text{CDCl}_3$ ):  $\delta$  (ppm) 159.2 (br, C-3), 148.3 (br), 138.2, 135.1, 128.7, 128.2, 102.2 (C-4).  $[\text{Ph}_2\text{B}(3\text{-(SF}_5\text{)Pz})_2]\text{Tl}$  and  $[\text{Cu}(\text{OTf})_2]\bullet\text{C}_7\text{H}_8$  (0.05 g, 0.09 mmol) were taken in a 50 mL Schlenk flask and 10 mL ethylene-saturated  $\text{CH}_2\text{Cl}_2$  was added into it. The reaction mixture was stirred for 3 h at room temperature. Ethylene gas was bubbled for three times during the reaction (30 seconds each time). The reaction mixture was filtered through a pad celite in a frit funnel. The filtrate was concentrated with continuous flow of ethylene and kept at  $-20$  °C to obtain X-ray quality colorless crystals of  $[\text{Ph}_2\text{B}(3\text{-(SF}_5\text{)Pz})_2]\text{Cu}(\text{C}_2\text{H}_4)$ . Yield: 89%. M.P.: 110-113 °C (decomposition). Anal. Calc.  $\text{C}_{20}\text{H}_{18}\text{BCuF}_{10}\text{N}_4\text{S}_2$ : C, 37.37; H, 2.82%; N, 8.72%. Found: C, 36.99%; H, 2.68%; N, 8.34%.  $^1\text{H}$  NMR ( $\text{CDCl}_3$ ):  $\delta$  (ppm) 7.63 (br, 2H, PzH), 7.35-7.28 (m, 5H, PhH), 7.24-7.23 (m, 3H, PhH), 6.64-6.62 (m, 2H, PhH), 6.54 (d,  $J = 2.9$  Hz, 2H, PzH), 3.72 (s, 4H,  $\text{C}_2\text{H}_4$ ).  $^{19}\text{F}$  NMR ( $\text{CDCl}_3$ ):  $\delta$  (ppm) 80.8 (pent,  $^2J_{\text{F-F}} = 153$  Hz, 2F), 65.4 (d,  $^2J_{\text{F-F}} = 153$  Hz, 8F).  $^{13}\text{C}\{^1\text{H}\}$  NMR ( $\text{CDCl}_3$ ):  $\delta$  (ppm) 159.4 (br, C-3), 137.7 (C-2), 136.1, 133.9, 128.1, 127.9, 127.7, 103.5 (C-4), 86.4 (C=C). IR ( $\text{cm}^{-1}$ ): 3010, 2933, 2862, 2360, 2337, 1539, 1497, 1432, 1389, 1305, 1273, 1195, 1149, 1077, 984, 977, 892, 849, 815. Raman ( $\text{cm}^{-1}$ ): 3161, 3152, 3137, 3055, 3044, 2996, 1593, 1568, 1538, 1371, 1315, 1278, 1273, 1232, 1188, 1156, 1142, 1078, 1072, 1031, 1017, 1000, 981, 959, 833, 827.

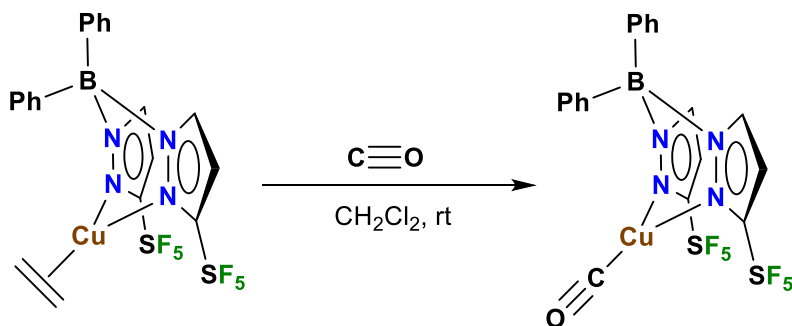

**$[\text{Ph}_2\text{B}(3\text{-(SF}_5\text{)Pz})_2]\text{Cu}(\text{CO})$ :**  $[\text{Ph}_2\text{B}(3\text{-(SF}_5\text{)Pz})_2]\text{Cu}(\text{C}_2\text{H}_4)$  (0.03 g, 0.05 mmol) was dissolved in 3 mL  $\text{CH}_2\text{Cl}_2$  and stirred for ~1-2 min while bubbling carbon monoxide. The reaction mixture was concentrated with continuous flow of carbon monoxide and kept at  $-20$  °C to obtain X-ray quality colorless crystals of  $[\text{Ph}_2\text{B}(3\text{-(SF}_5\text{)Pz})_2]\text{Cu}(\text{CO})$ . Yield: 98%. M.P.: 105-107 °C (decomposition).  $^1\text{H}$  NMR ( $\text{CDCl}_3$ ):  $\delta$  (ppm) 7.64 (br, 2H, PzH), 7.37-7.34 (m, 7H, PhH), 6.96 (br, 3H, PhH), 6.53 (d,  $J = 1.7$

### Supporting Information

Hz, 2H, PzH).  $^{19}\text{F}$  NMR ( $\text{CDCl}_3$ ):  $\delta$  (ppm) 80.2 (pent,  $^2J_{\text{F-F}} = 154.8$  Hz, 2F), 65.1 (d,  $^2J_{\text{F-F}} = 154.8$  Hz, 8F).  $^{13}\text{C}\{^1\text{H}\}$  NMR ( $\text{CDCl}_3$ ):  $\delta$  (ppm) 170.6 (br, CO), 159.0(br, C-3), 143.1 (br), 137.2, 135.0, 128.3, 128.1, 103.5 (C-4). IR ( $\text{cm}^{-1}$ ): 3024, 2967, 2121 ( $\bar{\nu}_{\text{C}=\text{O}}$ ), 1498, 1445, 1431, 1393, 1322, 1306, 1264, 1198, 1157, 1143, 1077, 987, 979, 849, 814.

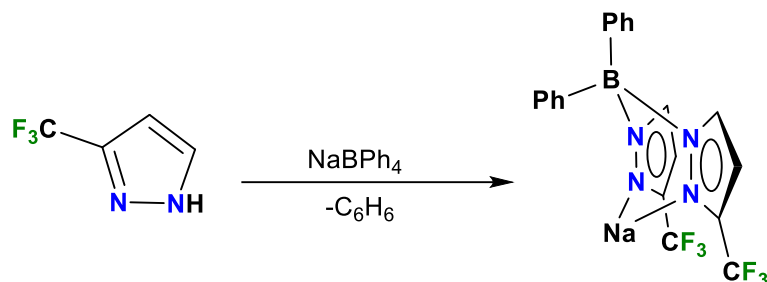

**[Ph<sub>2</sub>B(3-(CF<sub>3</sub>)Pz)<sub>2</sub>]Na:** The 3-(CF<sub>3</sub>)PzH (2.00 g, 14.70 mmol) and NaBPh<sub>4</sub> (1.70 g, 4.90 mmol) were mixed in a 25 mL long Schlenk flask and heated at 150 °C for 4 h during which the benzene was removed using a short path distillation apparatus. The reaction mixture was cooled to room temperature and washed with hexanes (3 X 15 mL). The remaining solid was dried under vacuum to get pure product as white solid. Yield: 52%. M.P.: 215-218 °C (decomposition). Anal. Calc. C<sub>20</sub>H<sub>14</sub>BF<sub>6</sub>N<sub>4</sub>Na: C, 52.43; H, 3.08%; N, 12.23%. Found: C, 52.80%; H, 3.46%; N, 11.90%.  $^1\text{H}$  NMR ( $(\text{CD}_3)_2\text{SO}$ ):  $\delta$  (ppm) 7.10-7.03 (m, 12H, PzH & PhH), 6.42 (d,  $J = 1.72$  Hz, 2H, PzH).  $^{19}\text{F}$  NMR ( $(\text{CD}_3)_2\text{SO}$ ):  $\delta$  (ppm) -59.0 (s).  $^{13}\text{C}\{^1\text{H}\}$  NMR ( $(\text{CD}_3)_2\text{SO}$ ):  $\delta$  (ppm) 151.6, 140.4 (q,  $^2J_{\text{C-F}} = 36.0$  Hz, C-3/C-5), 135.6, 133.7, 126.1, 124.8, 122.9 (q,  $^1J_{\text{C-F}} = 267.5$  Hz, CF<sub>3</sub>), 101.4 (C-4). IR ( $\text{cm}^{-1}$ ): 3117, 3060, 1515, 1496, 1434, 1369, 1259, 1165, 1125, 1113, 1060, 1007, 970, 883, 845, 814.

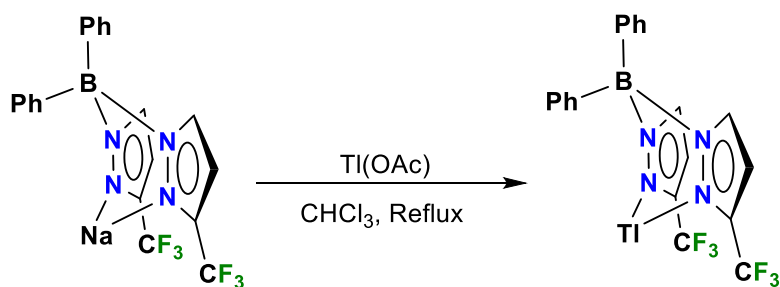

**[Ph<sub>2</sub>B(3-(CF<sub>3</sub>)Pz)<sub>2</sub>]Ti:** [Ph<sub>2</sub>B(3-(CF<sub>3</sub>)Pz)<sub>2</sub>]Na (1.00 g, 2.18 mmol) and Ti(OAc)<sub>3</sub> (0.58 g, 2.28 mM) were dissolved 30 mL of CHCl<sub>3</sub> in a Schlenk flask and refluxed for 1 h. The reaction mixture was cooled to room temperature and filtered through a pad



### Supporting Information

of celite in a frit funnel. The solvent was evaporated to get the product as white powder. Yield: 88%. M.P.: 194-197 °C (decomposition). Anal. Calc. C<sub>20</sub>H<sub>14</sub>BF<sub>6</sub>N<sub>4</sub>Tl: C, 37.56; H, 2.21%; N, 8.76%. Found: C, 37.21%; H, 2.18%; N, 8.48%. <sup>1</sup>H NMR (CDCl<sub>3</sub>): δ (ppm) 7.74 (d, *J* = 1.2 Hz, 2H, PzH), 7.38-7.32 (m, 6H, PhH), 7.01 (br, 4H, PhH), 6.49 (s, 1H, PzH). <sup>19</sup>F NMR (CDCl<sub>3</sub>): δ (ppm) -60.2 (d, <sup>4</sup>*J*<sub>Tl-F</sub> = 575.8 Hz). <sup>13</sup>C{<sup>1</sup>H} NMR (CDCl<sub>3</sub>): δ (ppm) 148.9, 143.0 (q, <sup>2</sup>*J*<sub>C-F</sub> = 43.2 Hz, C-3/C-5), 138.9, 135.0, 128.5, 127.9, 122.2 (q, <sup>1</sup>*J*<sub>C-F</sub> = 268.7 Hz, CF<sub>3</sub>), 102.7 (C-4). IR (cm<sup>-1</sup>): 2945, 1558, 1431, 1364, 1274, 1260, 1236, 1150, 1126, 1115, 1052, 1037, 999, 974.

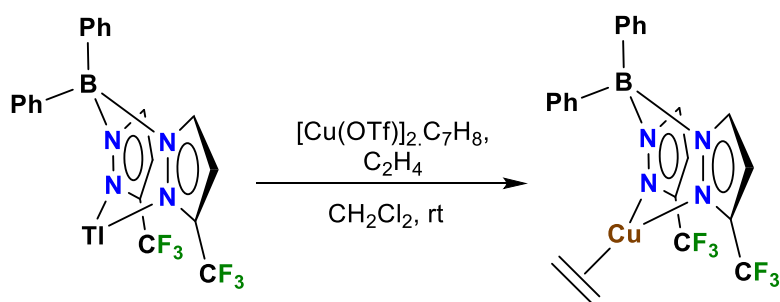

**[Ph<sub>2</sub>B(3-(CF<sub>3</sub>)Pz)<sub>2</sub>]Cu(C<sub>2</sub>H<sub>4</sub>):** [Ph<sub>2</sub>B(3-(CF<sub>3</sub>)Pz)<sub>2</sub>]Tl (0.10 g, 0.16 mmol) and [Cu(OTf)<sub>2</sub>·C<sub>7</sub>H<sub>8</sub>] (0.05 g, 0.09 mmol) were taken in a 50 mL Schlenk flask and 10 mL ethylene-saturated CH<sub>2</sub>Cl<sub>2</sub> was added into it. The reaction mixture was stirred for 3 h at room temperature. Ethylene gas was bubbled for three times during the reaction (30 seconds each time). The reaction mixture was filtered through a pad celite in a frit funnel. The filtrate was concentrated with continuous flow of ethylene and kept at -20 °C to obtain X-ray quality colorless crystals of [Ph<sub>2</sub>B(3-(CF<sub>3</sub>)Pz)<sub>2</sub>]Cu(C<sub>2</sub>H<sub>4</sub>). Yield: 91%. M.P.: 115-117 °C (decomposition). Anal. Calc. C<sub>22</sub>H<sub>18</sub>BCuF<sub>8</sub>N<sub>4</sub>: C, 50.16; H, 3.44%; N, 10.64%. Found: C, 49.81%; H, 3.25%; N, 10.29%. <sup>1</sup>H NMR (CDCl<sub>3</sub>): δ (ppm) 7.65 (s, 2H, PzH), 7.29 (br, 6H, PhH), 6.95 (br, 4H, PhH), 6.54 (s, 2H, PzH), 3.69 (s, 4H, C<sub>2</sub>H<sub>4</sub>). <sup>19</sup>F NMR (CDCl<sub>3</sub>): δ (ppm) -60.6 (s). <sup>13</sup>C{<sup>1</sup>H} NMR (CDCl<sub>3</sub>): δ (ppm) 142.7 (q, <sup>2</sup>*J*<sub>C-F</sub> = 37.2 Hz, C-3/C-5), 138.0, 134.9 (br), 127.6, 120.9 (q, <sup>1</sup>*J*<sub>C-F</sub> = 268.7 Hz, CF<sub>3</sub>), 103.7 (C-4), 82.7 (C=C). IR (cm<sup>-1</sup>): 3009, 2928, 2851, 1531, 1524, 1495, 1433, 1424, 1371, 1274, 1268, 1258, 1194, 1184, 1166, 1159, 1128, 1077, 1012, 976, 956, 944, 891. Raman (cm<sup>-1</sup>): 3173, 3157, 3152, 3138, 3067, 3052, 2983, 1593, 1569, 1531, 1521, 1388, 1381, 1371, 1269, 1185, 1168, 1159, 1144, 1083, 1032, 1011, 1000, 974, 944, 836.

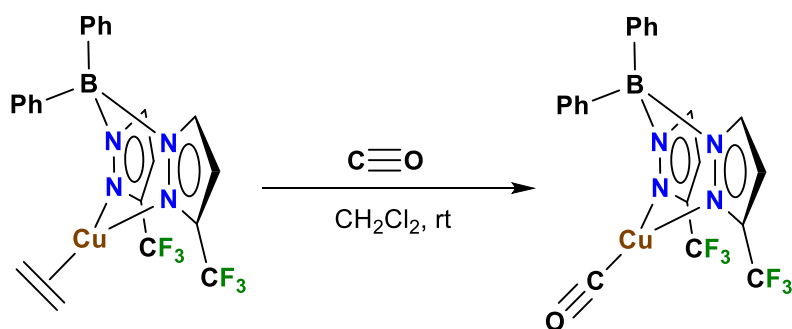

**[Ph<sub>2</sub>B(3-(CF<sub>3</sub>)Pz)<sub>2</sub>]Cu(CO):** [Ph<sub>2</sub>B(3-(CF<sub>3</sub>)Pz)<sub>2</sub>]Cu(C<sub>2</sub>H<sub>4</sub>) (0.10 g, 0.05 mmol) was dissolved in 8 mL CH<sub>2</sub>Cl<sub>2</sub> and stirred for ~3-5 min while bubbling carbon monoxide. The reaction mixture was concentrated with continuous flow of carbon monoxide and kept at -20 °C to obtain X-ray quality colorless crystals of [Ph<sub>2</sub>B(3-(CF<sub>3</sub>)Pz)<sub>2</sub>]Cu(CO) Yield: 99%. M.P.: 115-117 °C (decomposition). Anal. Calc. C<sub>21</sub>H<sub>14</sub>BCuF<sub>6</sub>N<sub>4</sub>O: C, 47.89; H, 2.68%; N, 10.64%. Found: C, 47.58%; H, 2.55%; N, 10.48%. <sup>1</sup>H NMR (CDCl<sub>3</sub>): δ (ppm) 7.63 (d, *J* = 1.2 Hz, 2H, Pz*H*), 7.34-7.29 (m, 6H, Ph*H*), 6.90-6.89 (m, 4H, Ph*H*), 6.54 (d, *J* = 2.3 Hz, 2H, Pz*H*). <sup>19</sup>F NMR (CDCl<sub>3</sub>): δ (ppm) -61.2 (s). <sup>13</sup>C{<sup>1</sup>H} NMR (CDCl<sub>3</sub>): δ (ppm) 171.3 (C≡O), 145.1, 142.7 (q, <sup>2</sup>*J*<sub>C-F</sub> = 37.2 Hz, C-3/C-5), 138.1, 134.5, 127.9, 120.9 (q, <sup>1</sup>*J*<sub>C-F</sub> = 269.9 Hz, CF<sub>3</sub>), 103.6 (C-4). IR (cm<sup>-1</sup>): 3011, 2932, 2854, 2117 ( $\bar{\nu}_{\text{C}=\text{O}}$ ), 1524, 1491, 1433, 1370, 1275, 1259, 1199, 1166, 1160, 1135, 1083, 1076, 1012, 893, 835.

## Cyclopropanation

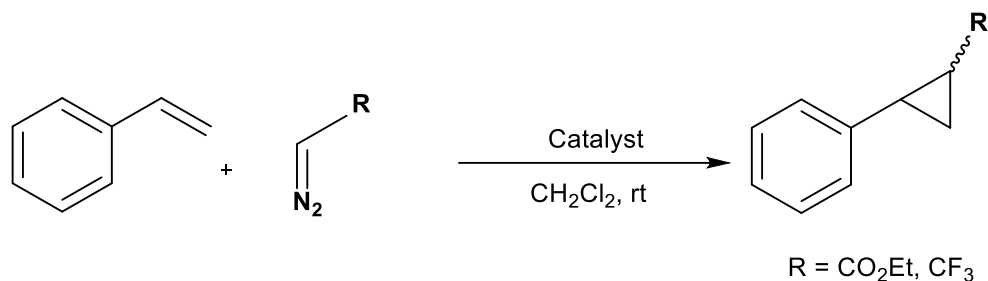

**General method for the cyclopropanation:** A Schlenk flask was charged with the styrene (2.8 mmol, 10.0 equiv.), catalyst (5 mol%) and dichloromethane (5.0 mL) under a nitrogen atmosphere. A dichloromethane solution of diazo compound (0.28 mmol) was added to the reaction via a syringe pump over 5 h. Following the complete addition of the diazo compound, the reaction mixture was stirred for 5 h. NMR yield was calculated using 1,3,5-tris(trifluoromethyl)benzene (<sup>1</sup>H NMR was used to calculate the yield of ethyldiazoacetate reactions (ester CH<sub>2</sub> peak) and <sup>19</sup>F NMR was used to calculate the yield of 2-diazo-1,1,1-trifluoroethane reactions (CF<sub>3</sub> peak)).

Table S2. Cyclopropanation

| Entry | Carbene source                        | Catalyst                                                                                    | Cyclopropane Yield (%) | Cis/trans | Reference to products |
|-------|---------------------------------------|---------------------------------------------------------------------------------------------|------------------------|-----------|-----------------------|
| 1     | N <sub>2</sub> CH(CO <sub>2</sub> Et) | [Ph <sub>2</sub> B(3-(CF <sub>3</sub> )Pz) <sub>2</sub> ]Cu(C <sub>2</sub> H <sub>4</sub> ) | 62                     | 48:52     | 4                     |
| 2     | N <sub>2</sub> CH(CO <sub>2</sub> Et) | [Ph <sub>2</sub> B(3-(SF <sub>5</sub> )Pz) <sub>2</sub> ]Cu(C <sub>2</sub> H <sub>4</sub> ) | 99                     | 61:39     | 4                     |
| 3     | N <sub>2</sub> CHCF <sub>3</sub>      | [Ph <sub>2</sub> B(3-(CF <sub>3</sub> )Pz) <sub>2</sub> ]Cu(C <sub>2</sub> H <sub>4</sub> ) | 70                     | 44:56     | 5                     |
| 4     | N <sub>2</sub> CHCF <sub>3</sub>      | [Ph <sub>2</sub> B(3-(SF <sub>5</sub> )Pz) <sub>2</sub> ]Cu(C <sub>2</sub> H <sub>4</sub> ) | 83                     | 25:75     | 5                     |

$^1\text{H}$ ,  $^{13}\text{C}$ ,  $^{19}\text{F}$  NMR and Raman Spectra of Compounds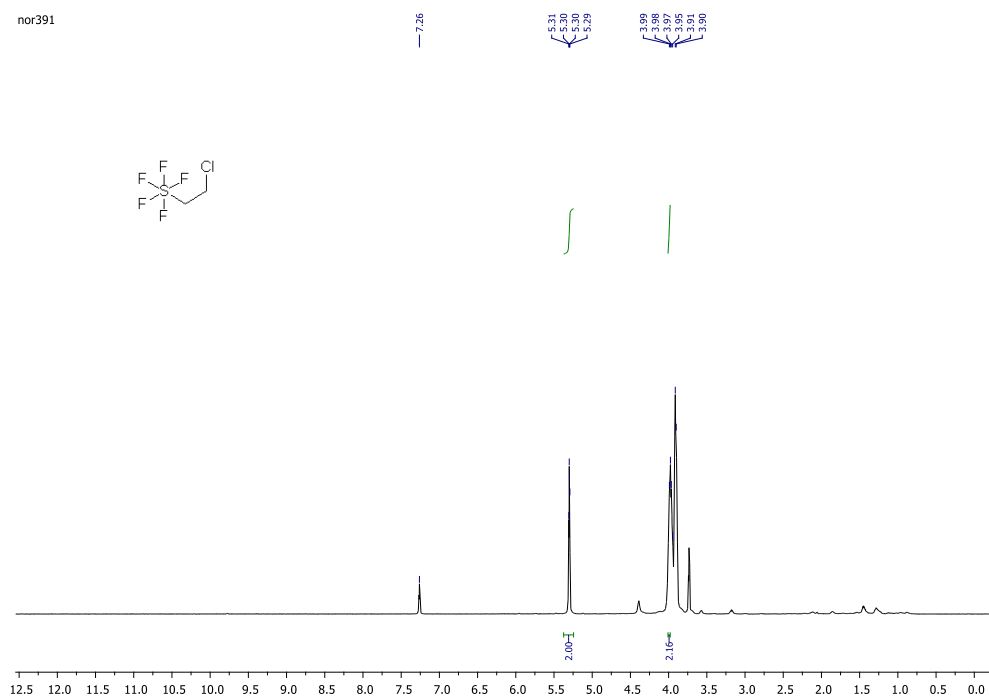**Figure S1:**  $^1\text{H}$  NMR Spectrum of (2-Chloroethyl)pentafluoro- $\lambda^6$ -sulfane in  $\text{CDCl}_3$ .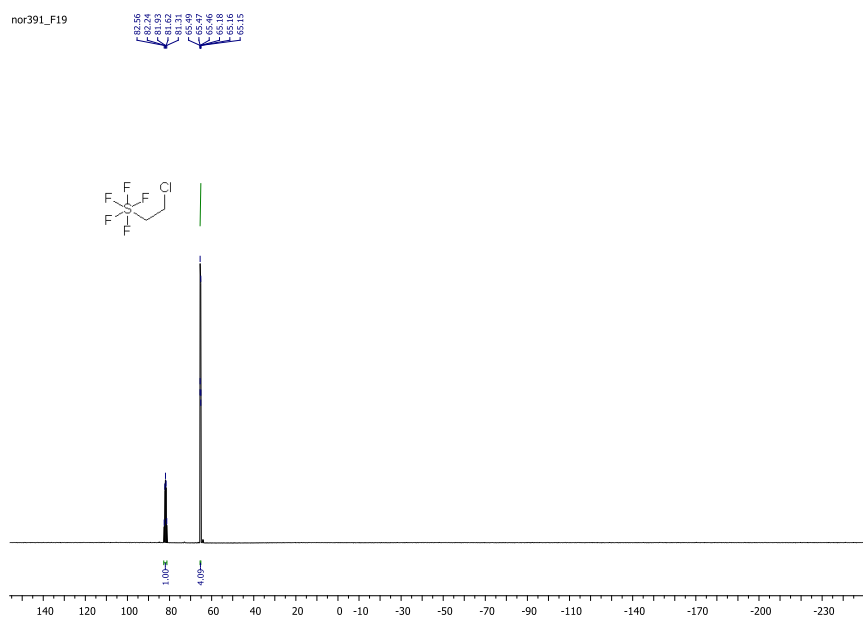**Figure S2:**  $^{19}\text{F}$  NMR Spectrum of (2-Chloroethyl)pentafluoro- $\lambda^6$ -sulfane in  $\text{CDCl}_3$ .

Supporting Information

NOR339

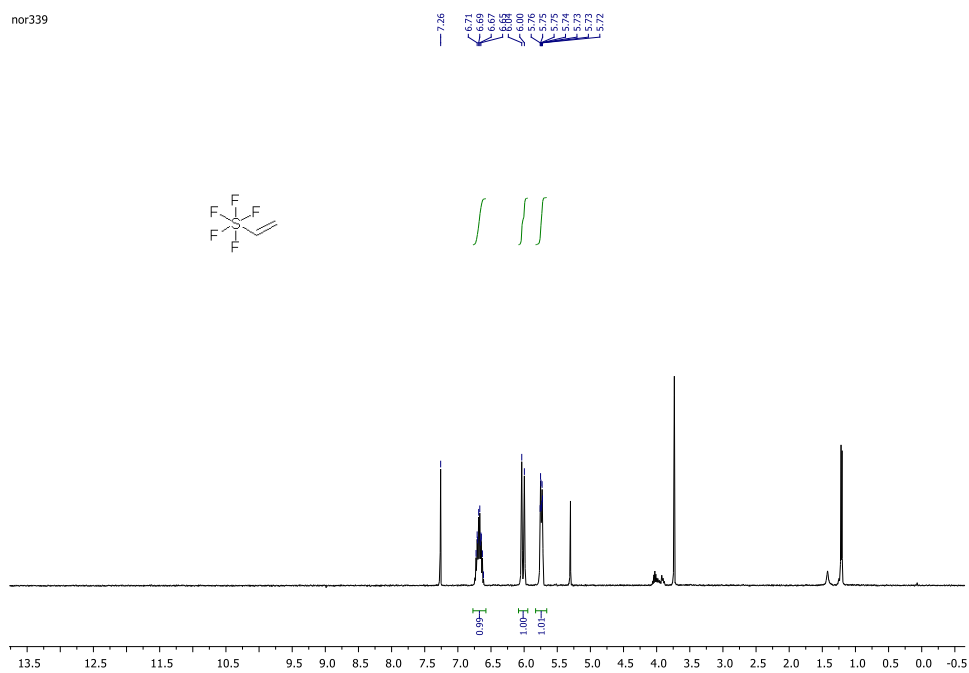

Figure S3:  $^1\text{H}$  NMR Spectrum of Pentafluoro(vinyl)- $\lambda^6$ -sulfane (**4**) in  $\text{CDCl}_3$ .

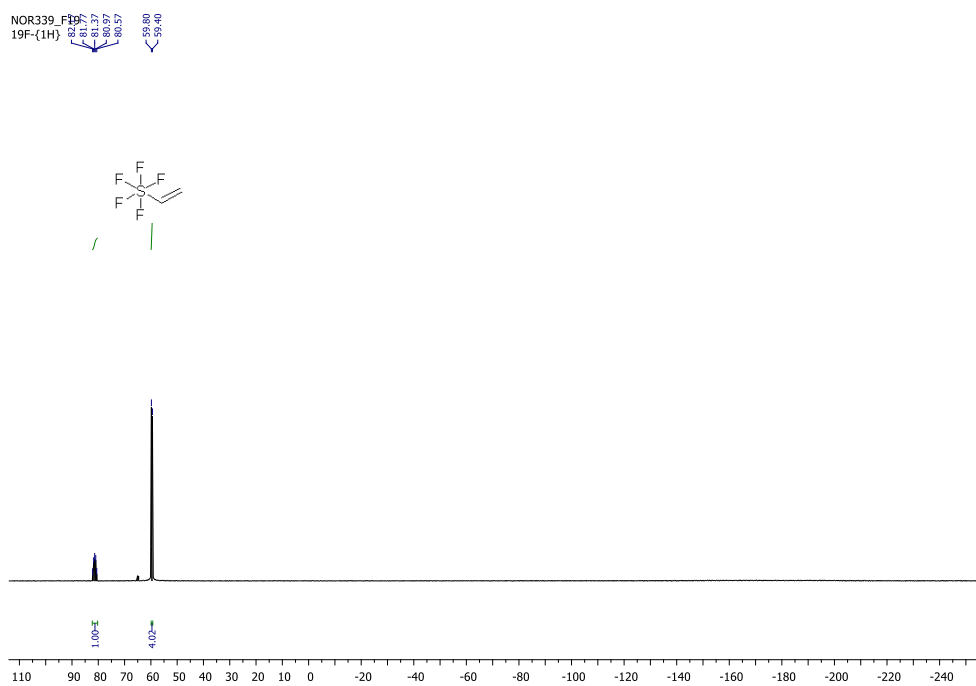

Figure S4:  $^{19}\text{F}$  NMR Spectrum of Pentafluoro(vinyl)- $\lambda^6$ -sulfane (**4**) in  $\text{CDCl}_3$ .

Supporting Information

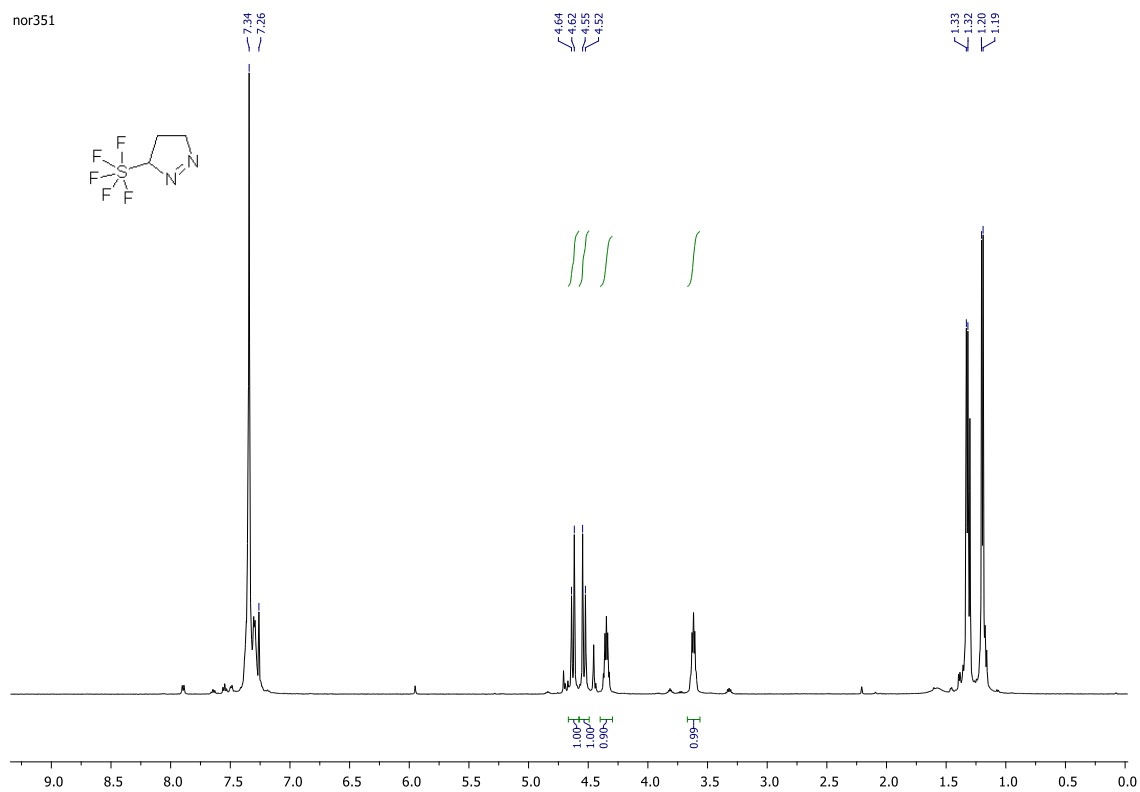

Figure S5:  $^1\text{H}$  NMR Spectrum of 5-(Pentafluoro- $\lambda^6$ -sulfanyl)-4,5-dihydro-3H-pyrazole (**5**) in  $\text{CDCl}_3$ .

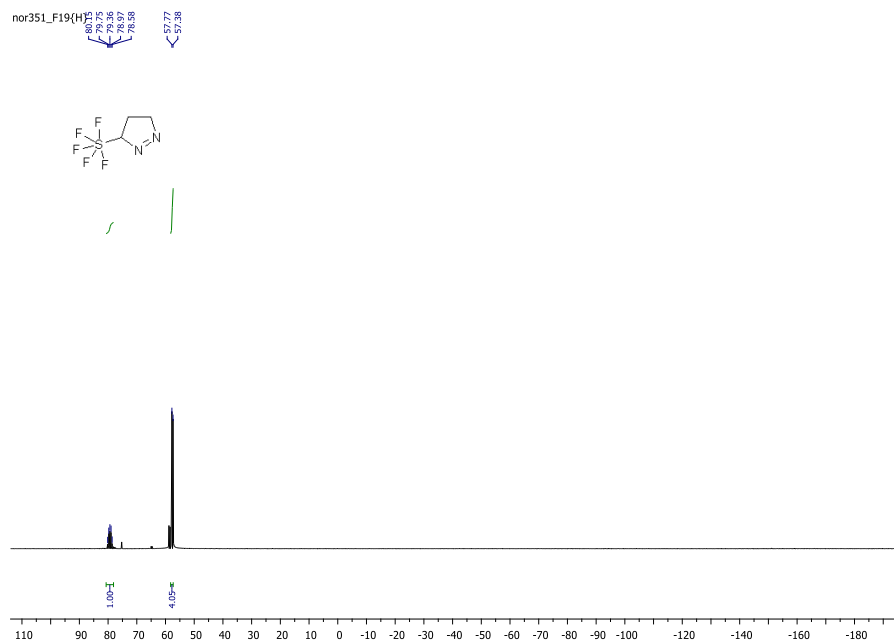

Figure S6:  $^{19}\text{F}$  NMR Spectrum of 5-(Pentafluoro- $\lambda^6$ -sulfanyl)-4,5-dihydro-3H-pyrazole (**5**) in  $\text{CDCl}_3$ .

Supporting Information

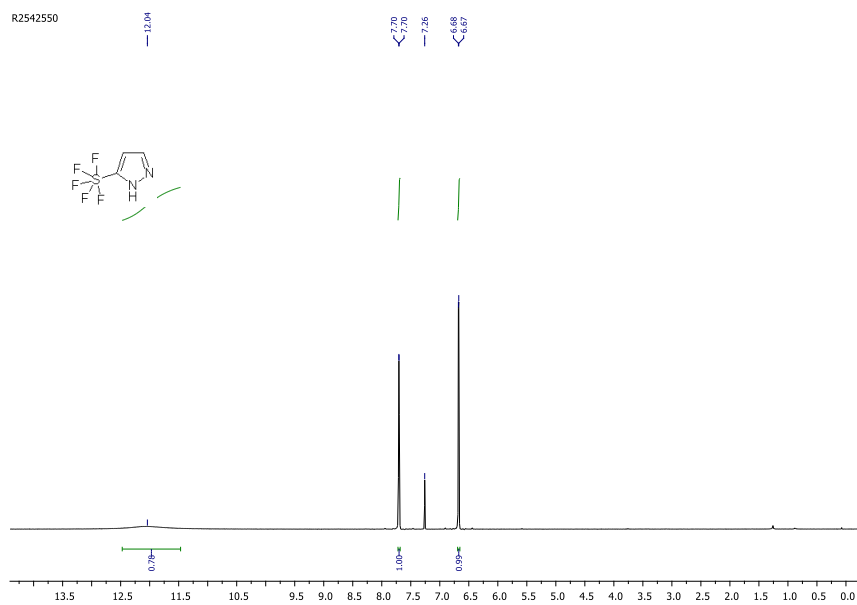

Figure S7:  $^1\text{H}$  NMR Spectrum of 5-(Pentafluoro- $\lambda^6$ -sulfanyl)-1*H*-pyrazole (**1**) in  $\text{CDCl}_3$ .

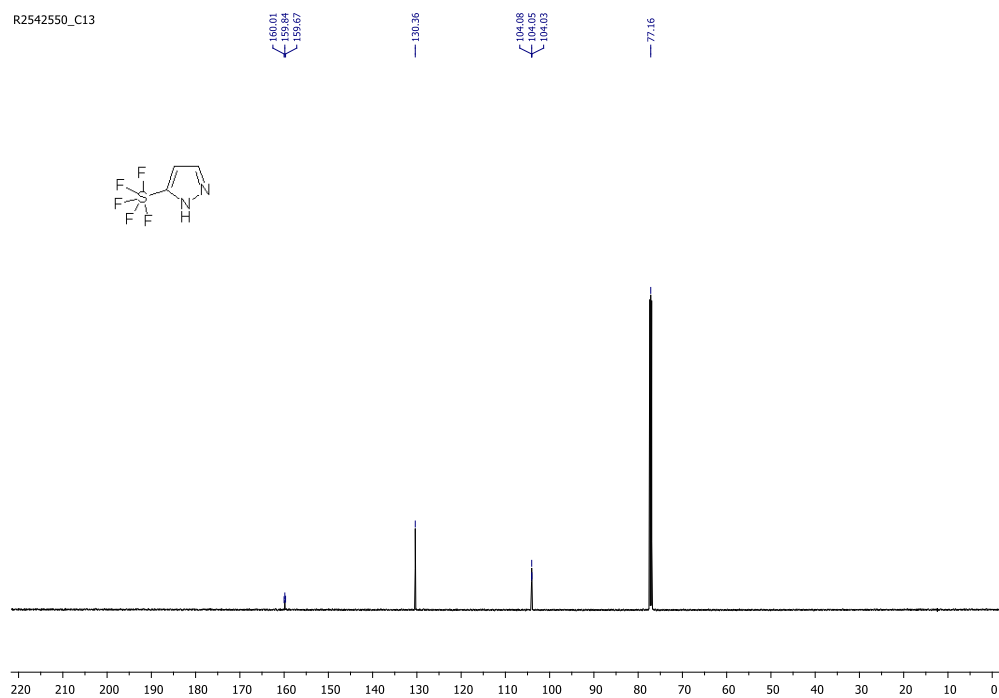

Figure S8:  $^{13}\text{C}$  NMR Spectrum of 5-(Pentafluoro- $\lambda^6$ -sulfanyl)-1*H*-pyrazole (**1**) in  $\text{CDCl}_3$ .

Supporting Information

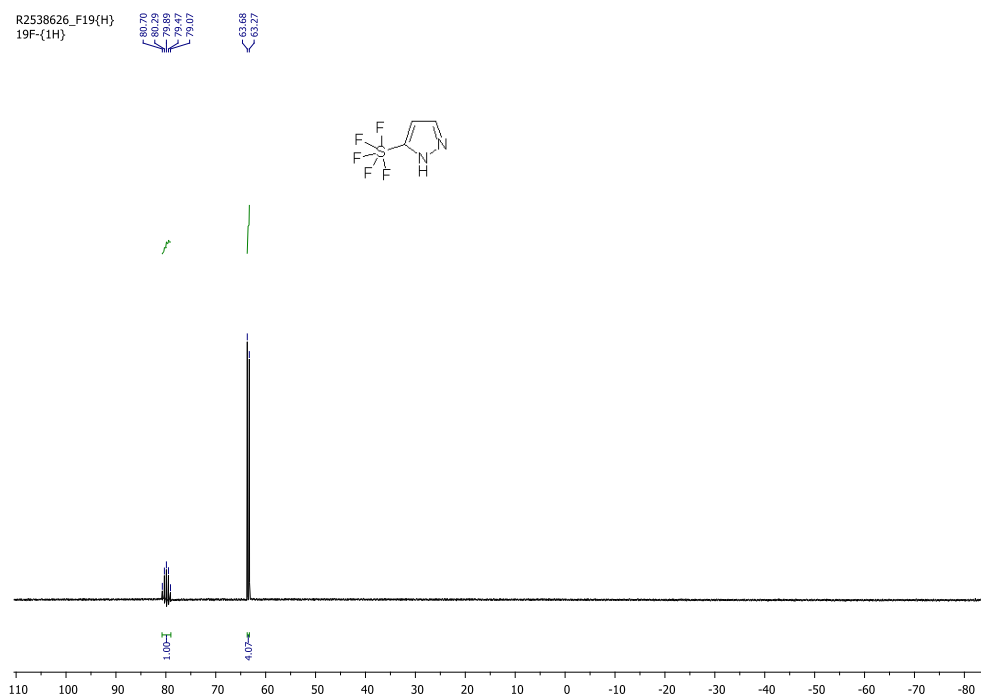

Figure S9:  $^{19}\text{F}$  NMR Spectrum of 5-(Pentafluoro- $\lambda^6$ -sulfanyl)-1H-pyrazole (**1**) in  $\text{CDCl}_3$ .

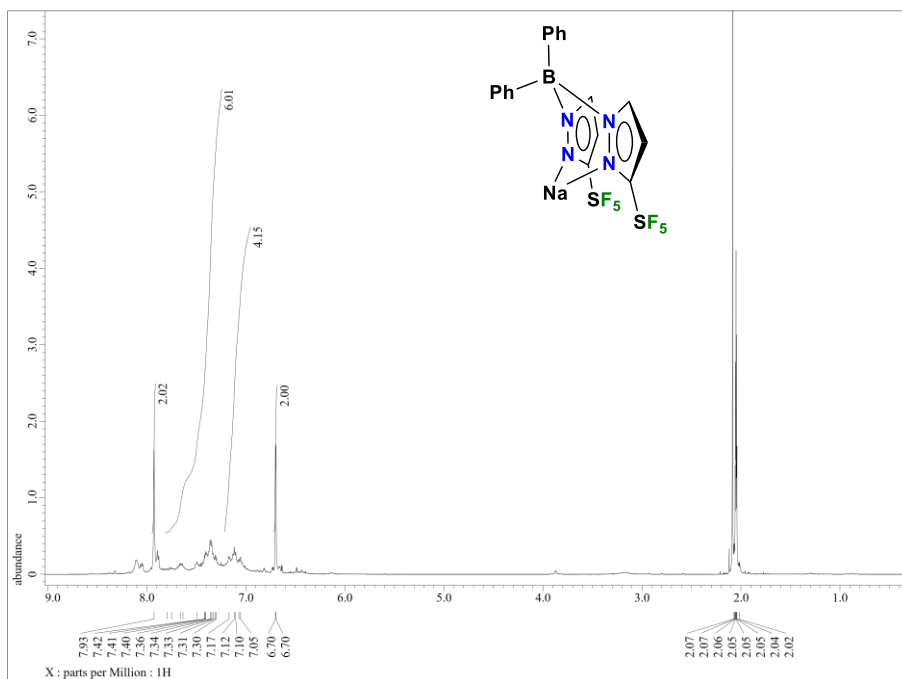

Figure S10:  $^1\text{H}$  NMR Spectrum of  $[\text{Ph}_2\text{B}(\text{3-(SF}_5\text{)Pz})_2]\text{Na}$  in  $(\text{CD}_3)_2\text{CO}$ .



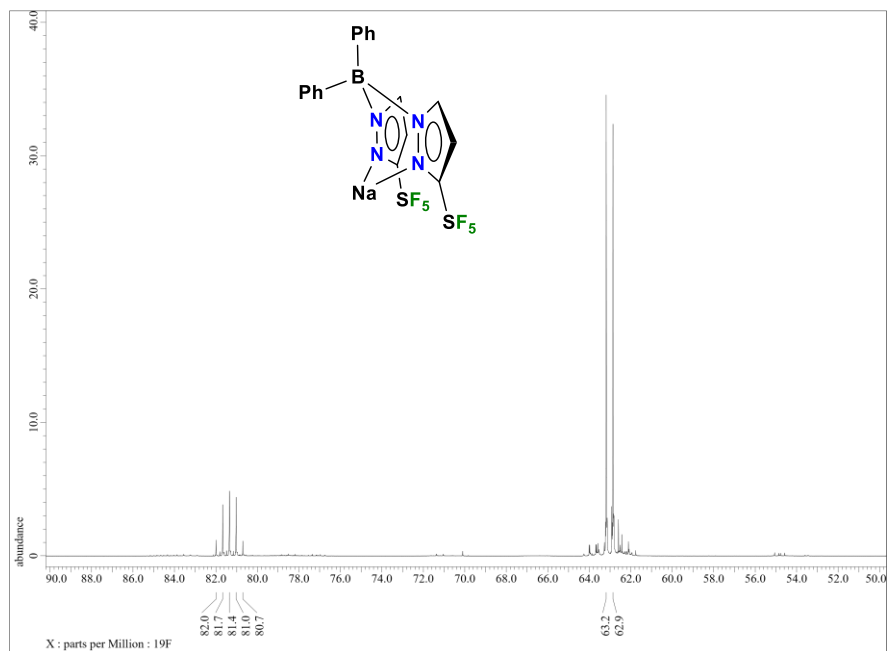

Figure S11:  $^{19}\text{F}$  NMR Spectrum of  $[\text{Ph}_2\text{B}(\text{3-(SF}_5\text{)Pz})_2]\text{Na}$  in  $(\text{CD}_3)_2\text{CO}$ .

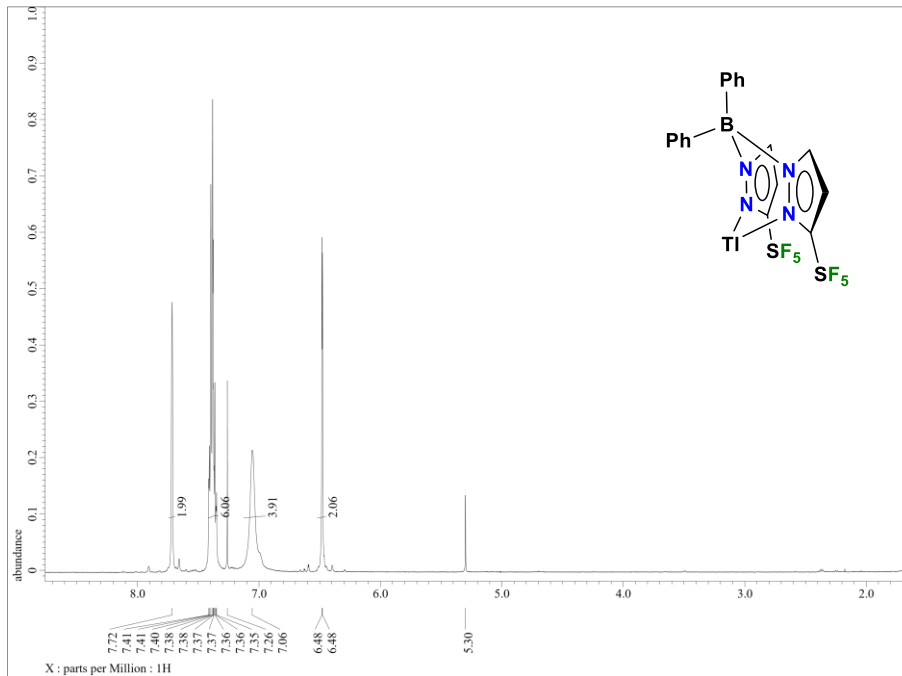

Figure S12:  $^1\text{H}$  NMR Spectrum of  $[\text{Ph}_2\text{B}(\text{3-(SF}_5\text{)Pz})_2]\text{TI}$  in  $\text{CDCl}_3$ .

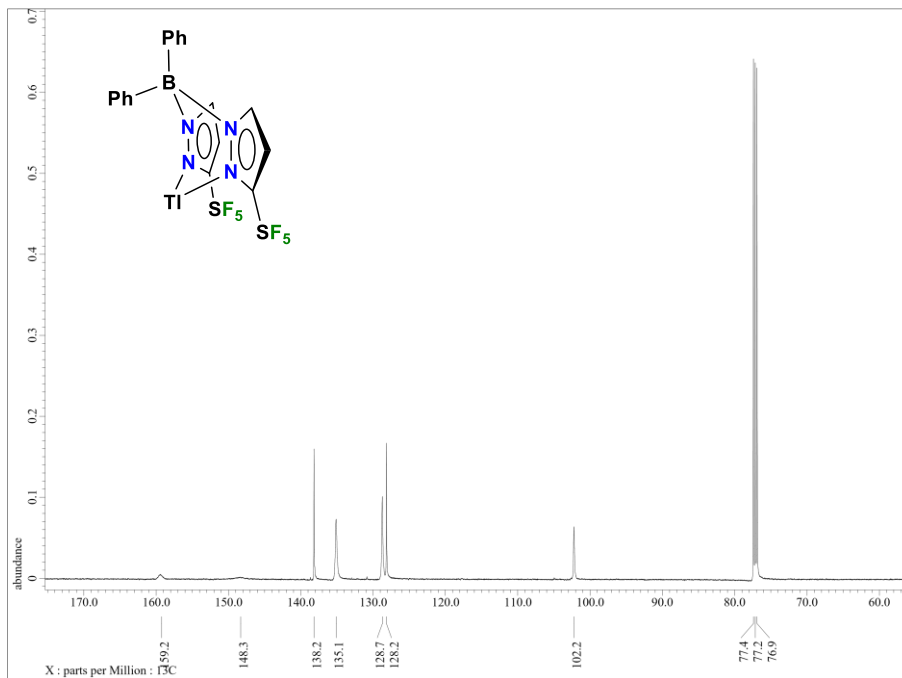

Figure S13: <sup>13</sup>C NMR Spectrum of  $\text{Ph}_2\text{B}(3\text{-(SF}_5\text{)Pz})_2[\text{Tl}]$  in  $\text{CDCl}_3$ .

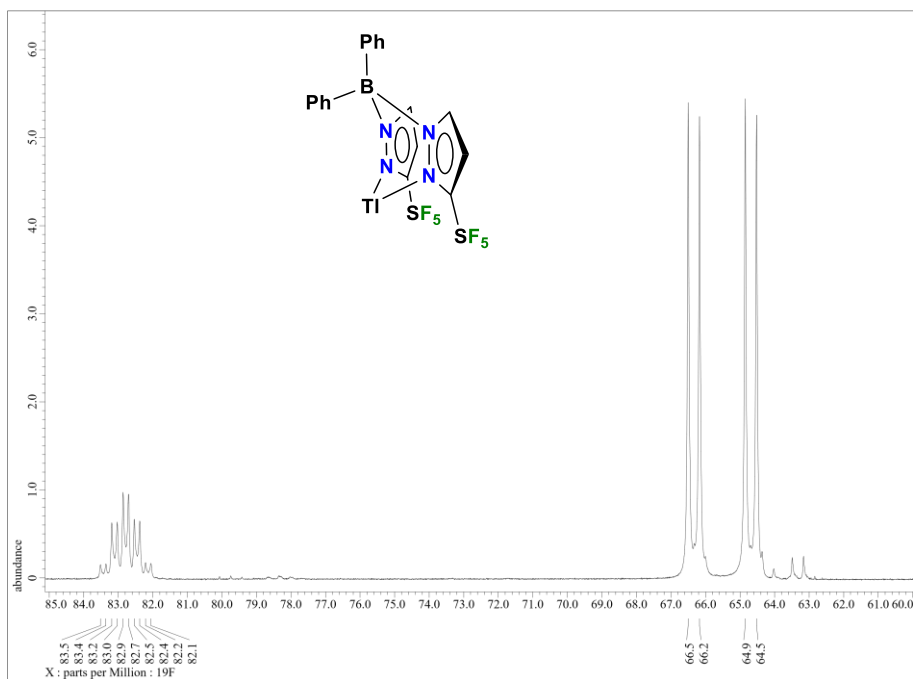

Figure S14: <sup>19</sup>F NMR Spectrum of  $[\text{Ph}_2\text{B}(3\text{-(SF}_5\text{)Pz})_2]\text{Tl}$  in  $\text{CDCl}_3$ .

Supporting Information

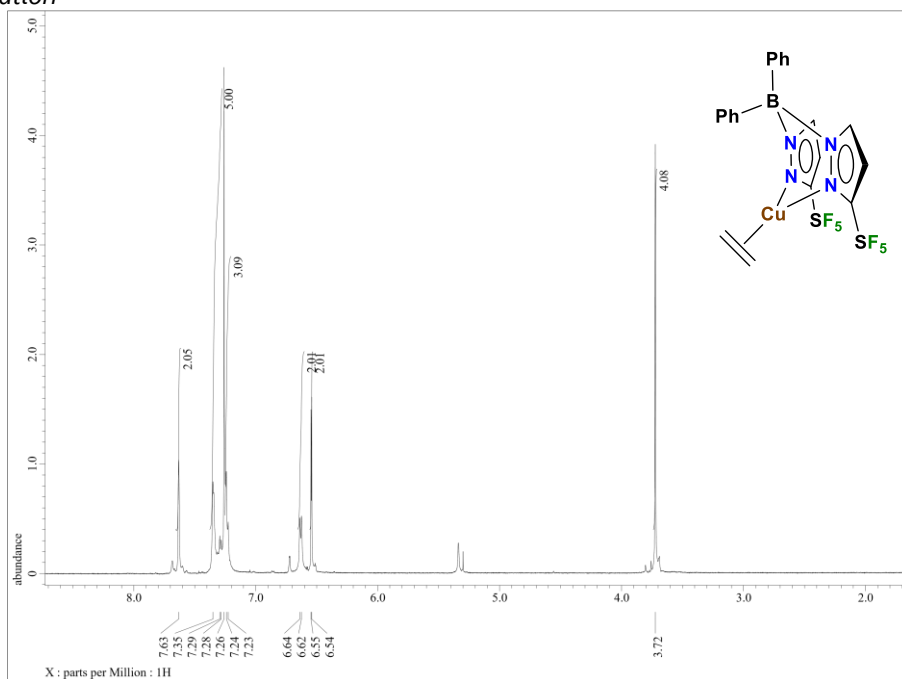

Figure S15:  $^1\text{H}$  NMR Spectrum of  $[\text{Ph}_2\text{B}(\text{3-(SF}_5\text{)Pz})_2]\text{Cu}(\text{C}_2\text{H}_4)$  in  $\text{CDCl}_3$

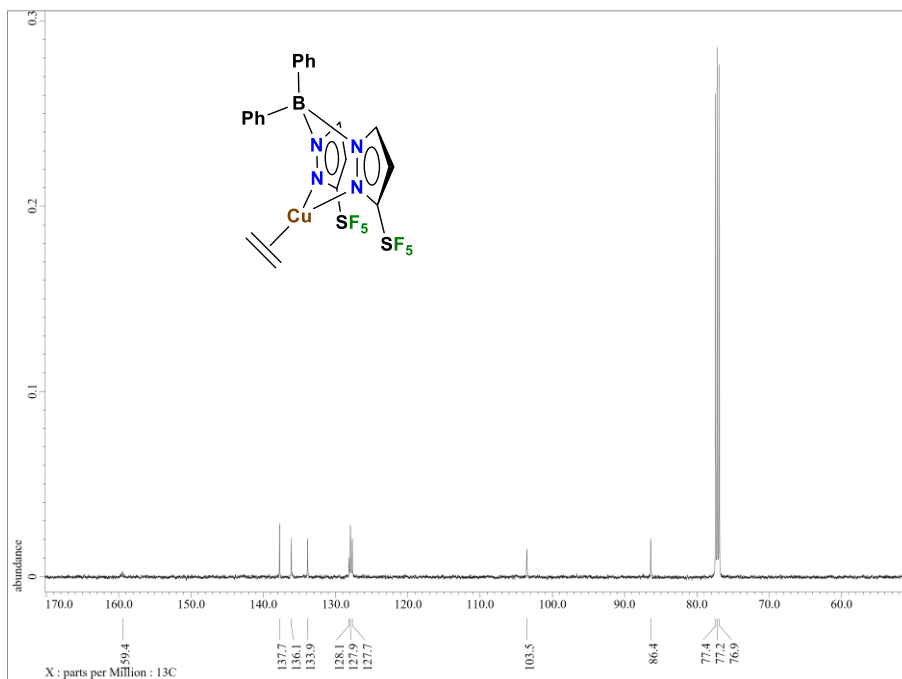

Figure S16:  $^{13}\text{C}$  NMR Spectrum of  $[\text{Ph}_2\text{B}(\text{3-(SF}_5\text{)Pz})_2]\text{Cu}(\text{C}_2\text{H}_4)$  in  $\text{CDCl}_3$ .

Supporting Information

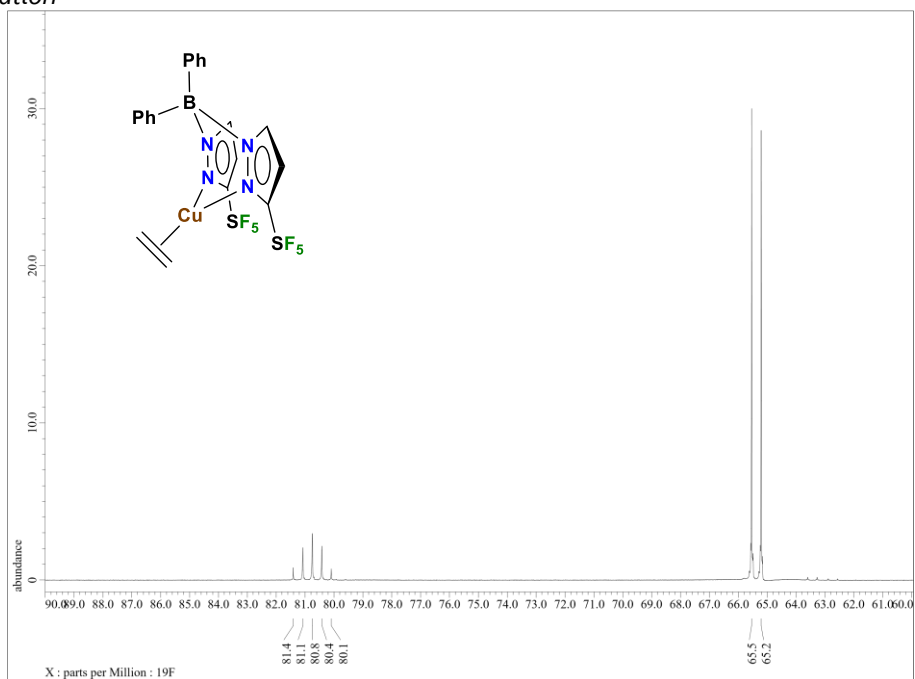

Figure S17:  $^{19}\text{F}$  NMR Spectrum of  $[\text{Ph}_2\text{B}(\text{3-(SF}_5\text{)Pz})_2]\text{Cu}(\text{C}_2\text{H}_4)$  in  $\text{CDCl}_3$ .

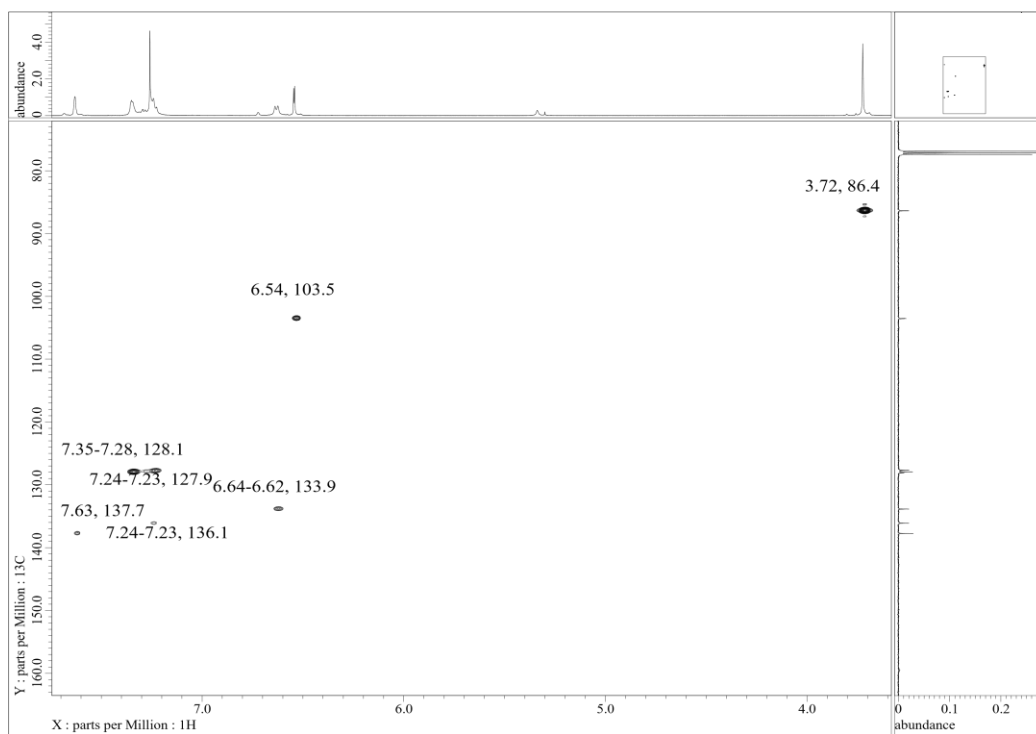

Figure S18: HSQC NMR Spectrum of  $[\text{Ph}_2\text{B}(\text{3-(SF}_5\text{)Pz})_2]\text{Cu}(\text{C}_2\text{H}_4)$  in  $\text{CDCl}_3$ .

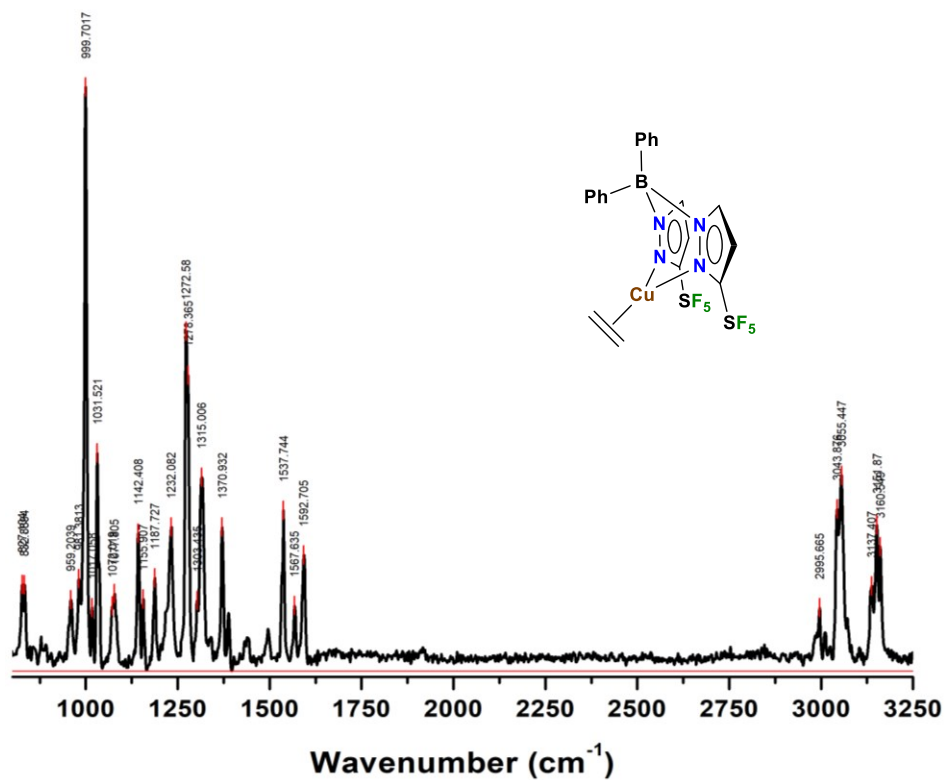Figure S19: Raman Spectrum of  $[\text{Ph}_2\text{B}(\text{3-SF}_5\text{Pz})_2]\text{Cu}(\text{C}_2\text{H}_4)$ .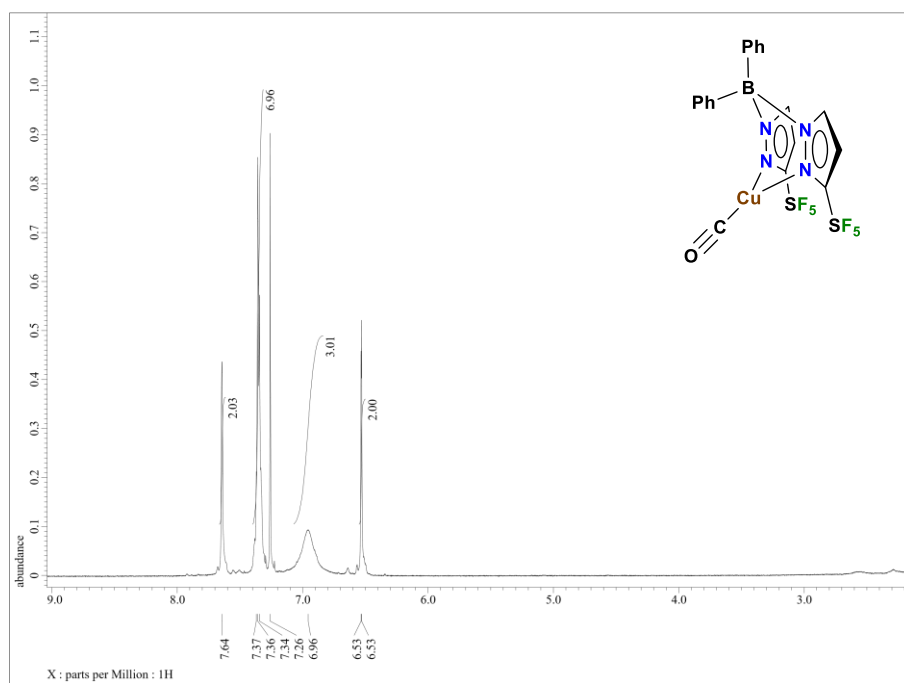Figure S20:  $^1\text{H}$  NMR Spectrum of  $[\text{Ph}_2\text{B}(\text{3-(SF}_5\text{)Pz})_2]\text{Cu}(\text{CO})$  in  $\text{CDCl}_3$

Supporting Information

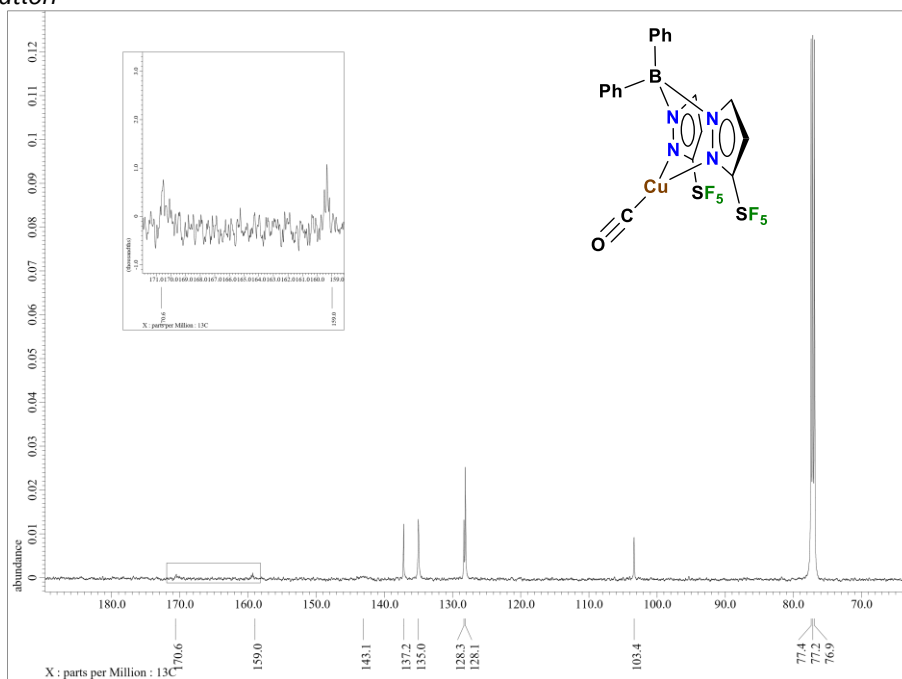

Figure S21:  $^{13}\text{C}$  NMR Spectrum of  $[\text{Ph}_2\text{B}(\text{3-(SF}_5\text{)Pz})_2]\text{Cu}(\text{CO})$  in  $\text{CDCl}_3$

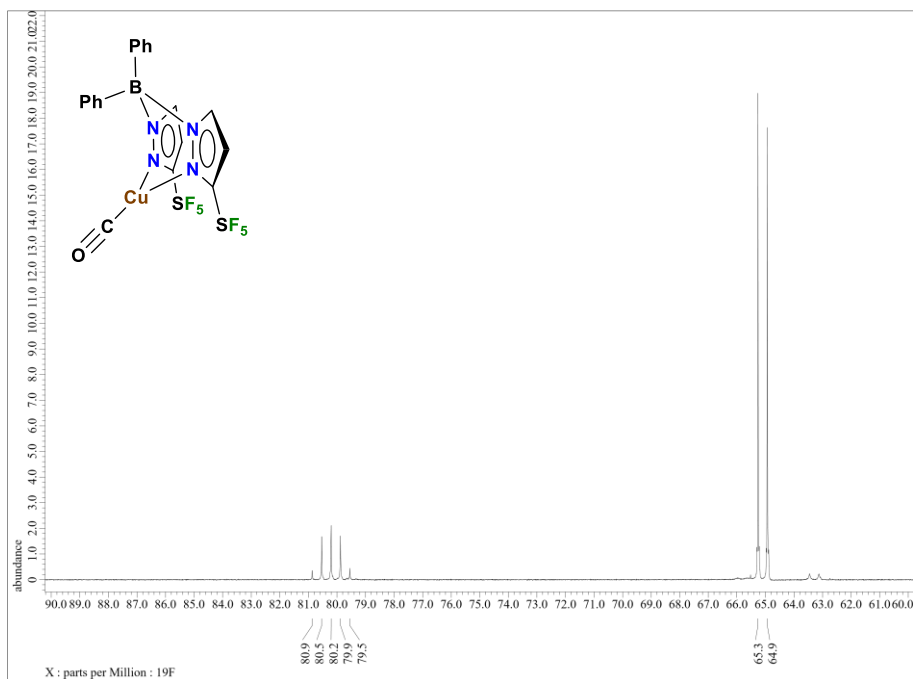

Figure S22:  $^{19}\text{F}$  NMR Spectrum of  $[\text{Ph}_2\text{B}(\text{3-(SF}_5\text{)Pz})_2]\text{Cu}(\text{CO})$  in  $\text{CDCl}_3$

Supporting Information

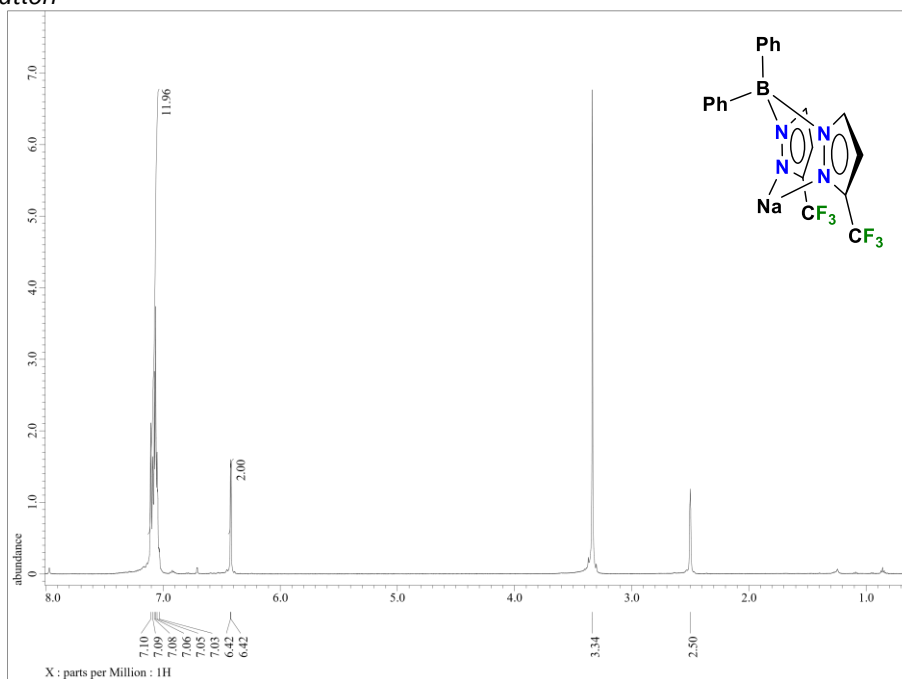

**Figure S23:**  $^1\text{H}$  NMR Spectrum of  $[\text{Ph}_2\text{B}(\text{3-CF}_3)\text{Pz}]_2\text{Na}$  in  $(\text{CD}_3)_2\text{SO}$ .

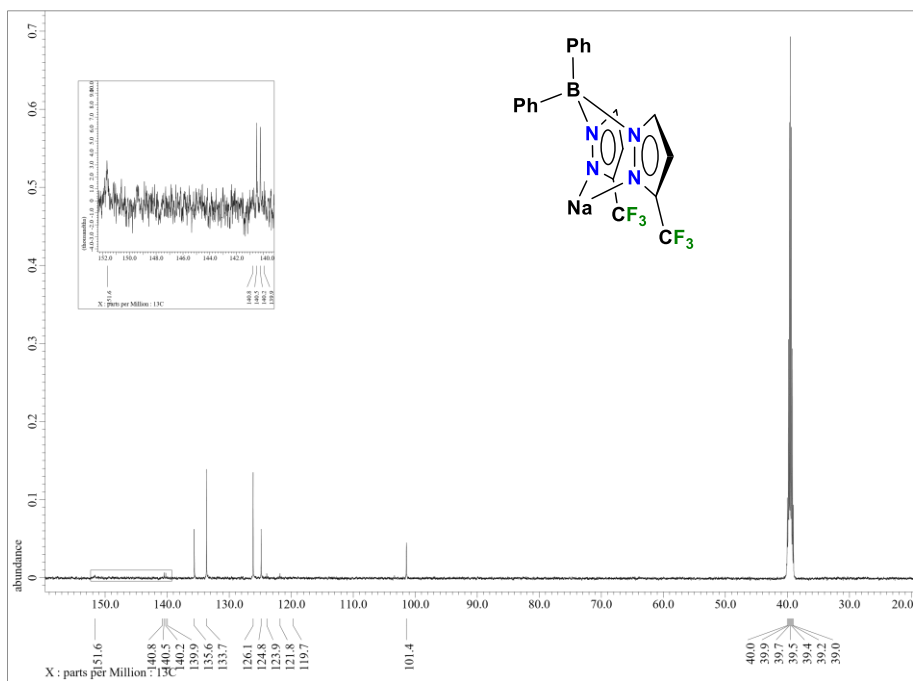

**Figure S24:**  $^{13}\text{C}$  NMR Spectrum of  $[\text{Ph}_2\text{B}(\text{3-CF}_3)\text{Pz}]_2\text{Na}$  in  $(\text{CD}_3)_2\text{SO}$ .

Supporting Information

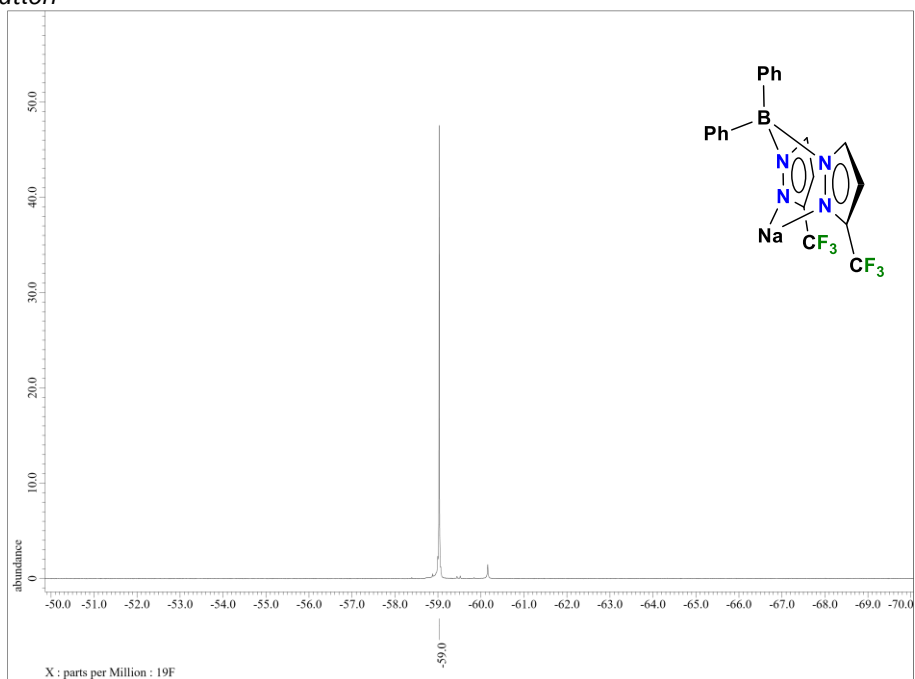

Figure S25:  $^{19}\text{F}$  NMR Spectrum of  $[\text{Ph}_2\text{B}(\text{3-CF}_3)\text{Pz}]_2\text{Na}$  in  $(\text{CD}_3)_2\text{SO}$ .

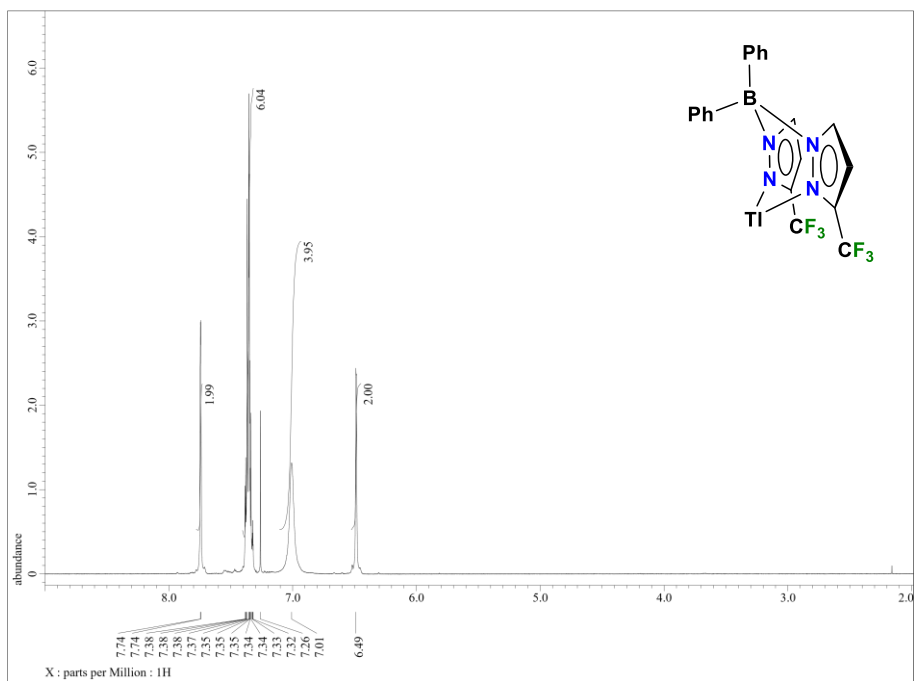

Figure S26:  $^1\text{H}$  NMR Spectrum of  $[\text{Ph}_2\text{B}(\text{3-CF}_3)\text{Pz}]_2\text{Tl}$  in  $\text{CDCl}_3$



Supporting Information

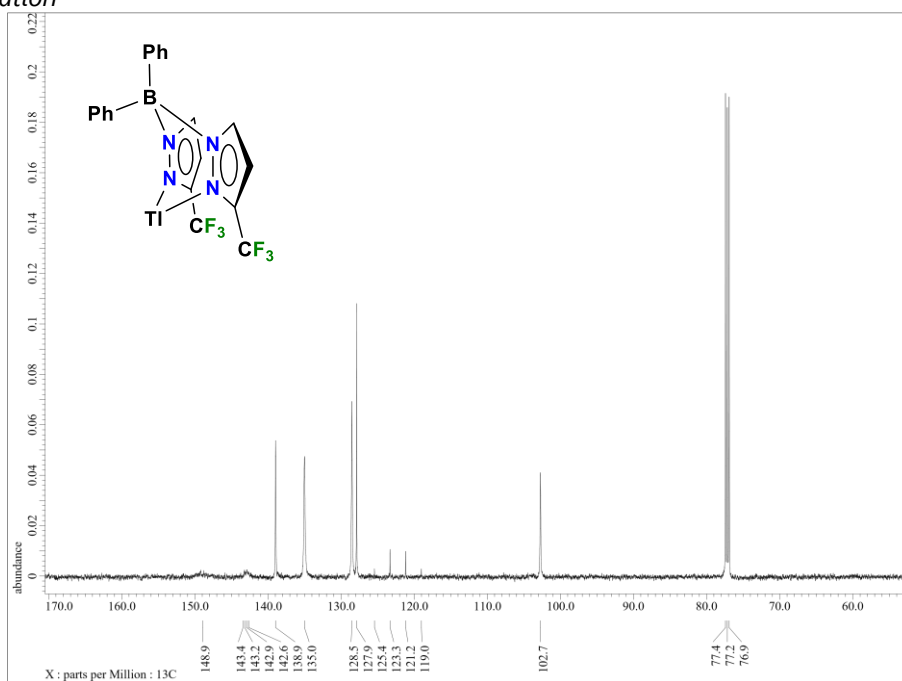

Figure S27:  $^{13}\text{C}$  NMR Spectrum of  $[\text{Ph}_2\text{B}(\text{3-CF}_3)\text{Pz}]_2\text{TI}$  in  $\text{CDCl}_3$ .

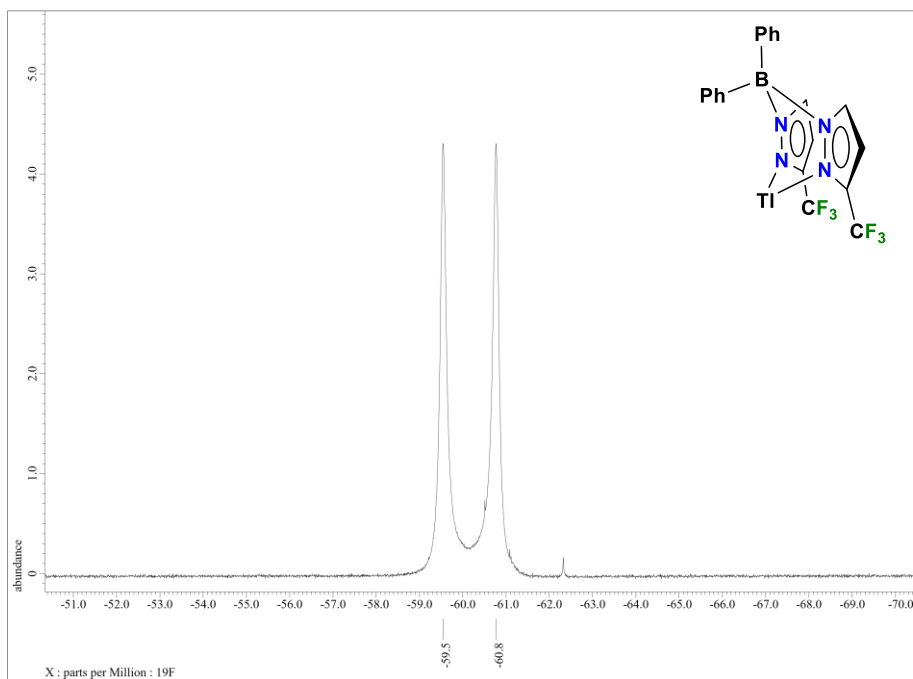

Figure S28:  $^{19}\text{F}$  NMR Spectrum of  $[\text{Ph}_2\text{B}(\text{3-CF}_3)\text{Pz}]_2\text{TI}$  in  $\text{CDCl}_3$ .

Supporting Information

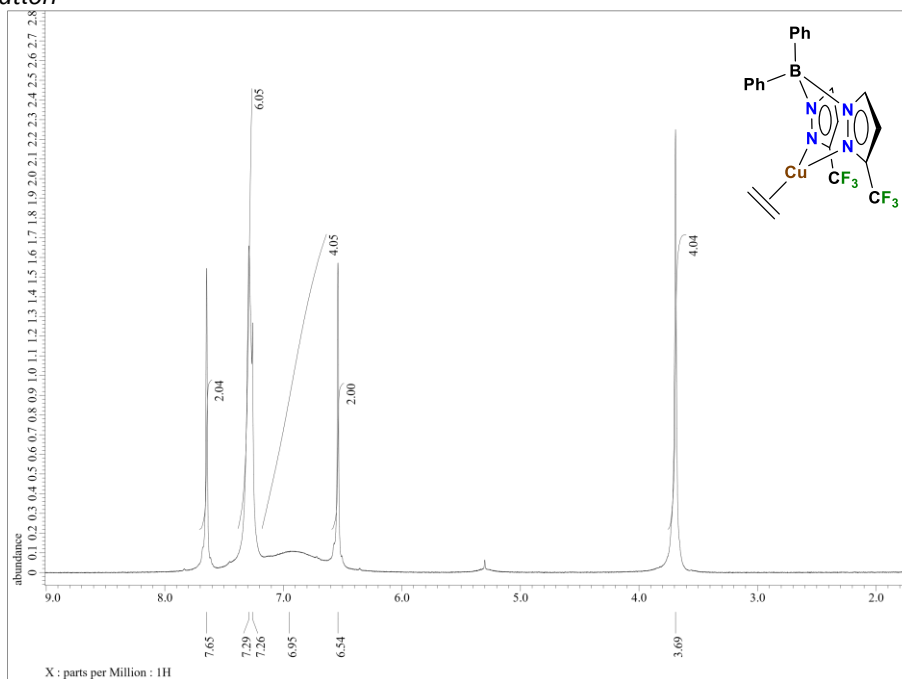

Figure S29:  $^1\text{H}$  NMR Spectrum of  $[\text{Ph}_2\text{B}(\text{3-CF}_3)\text{Pz}]_2\text{Cu}(\text{C}_2\text{H}_4)$  in  $\text{CDCl}_3$

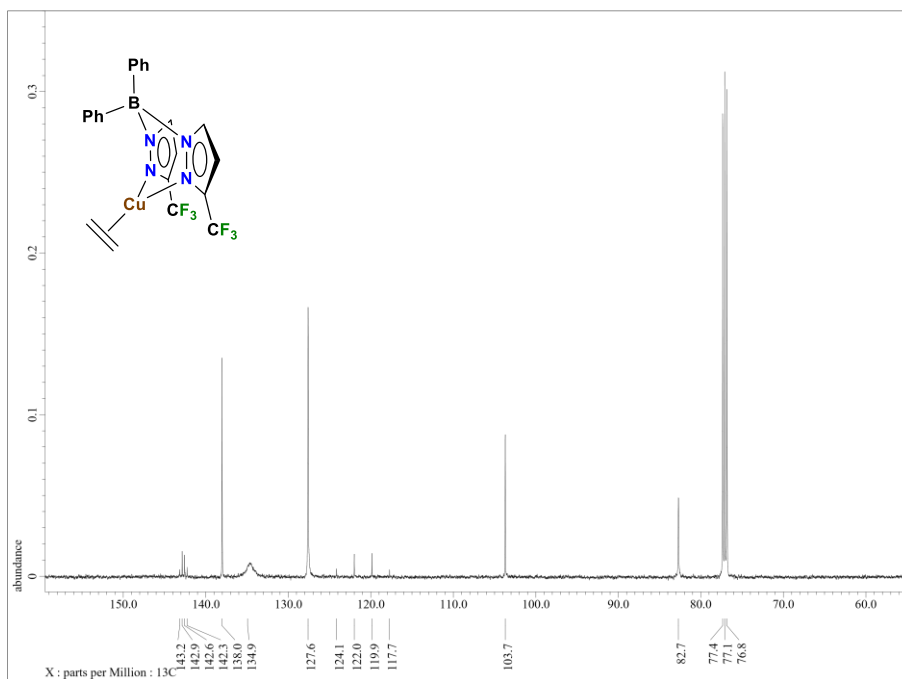

Figure S30:  $^{13}\text{C}$  NMR Spectrum of  $[\text{Ph}_2\text{B}(\text{3-CF}_3)\text{Pz}]_2\text{Cu}(\text{C}_2\text{H}_4)$  in  $\text{CDCl}_3$ .

Supporting Information

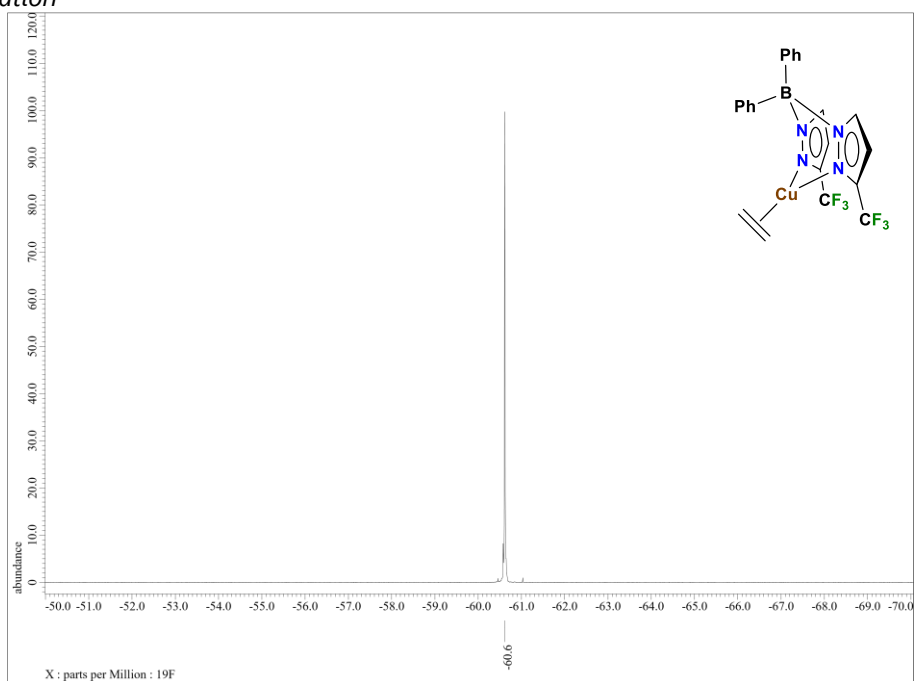

Figure S31:  $^{19}\text{F}$  NMR Spectrum of  $[\text{Ph}_2\text{B}(\text{3-CF}_3)\text{Pz}]_2\text{Cu}(\text{C}_2\text{H}_4)$  in  $\text{CDCl}_3$ .

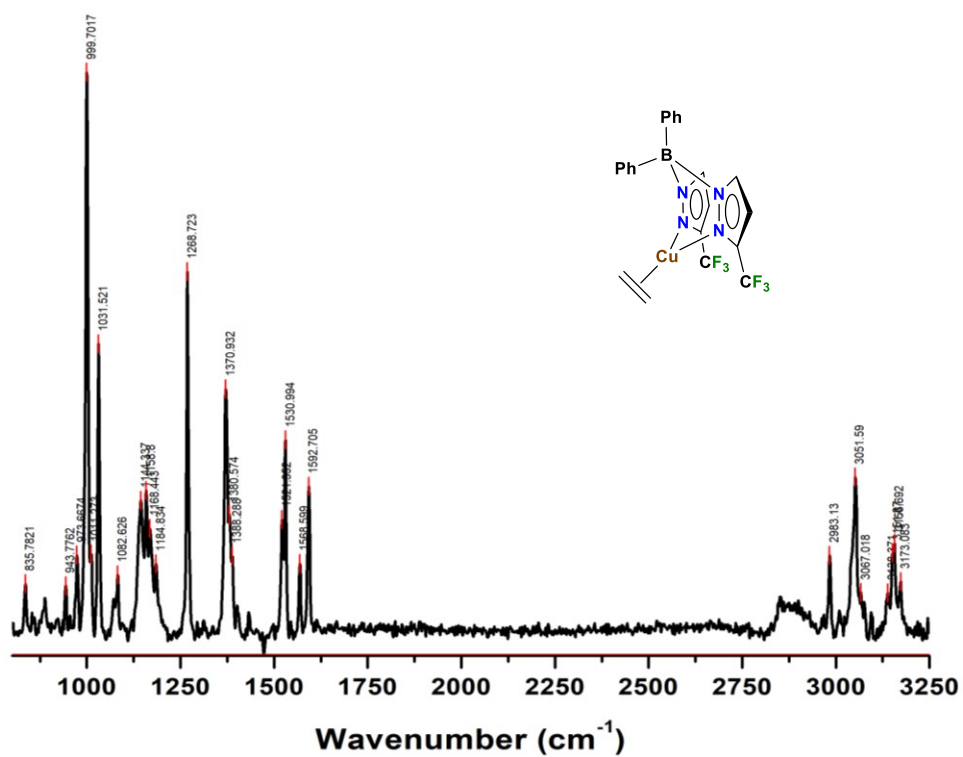

Figure S32: Raman Spectrum of  $[\text{Ph}_2\text{B}(\text{3-CF}_3)\text{Pz}]_2\text{Cu}(\text{C}_2\text{H}_4)$ .

Supporting Information

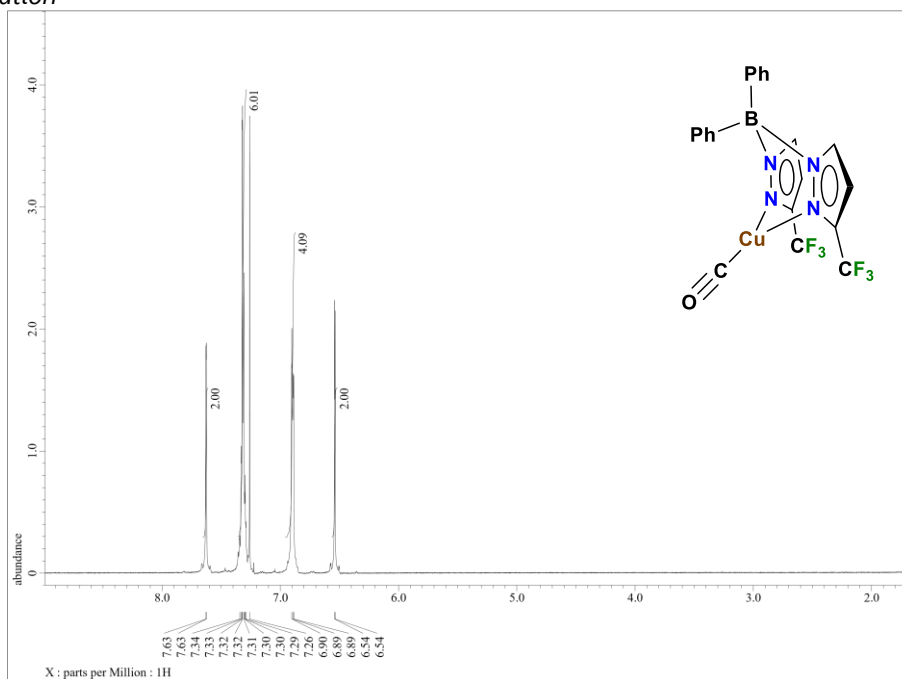

Figure S33:  $^1\text{H}$  NMR Spectrum of  $[\text{Ph}_2\text{B}(3\text{-CF}_3)\text{Pz}]_2\text{Cu}(\text{CO})$  in  $\text{CDCl}_3$

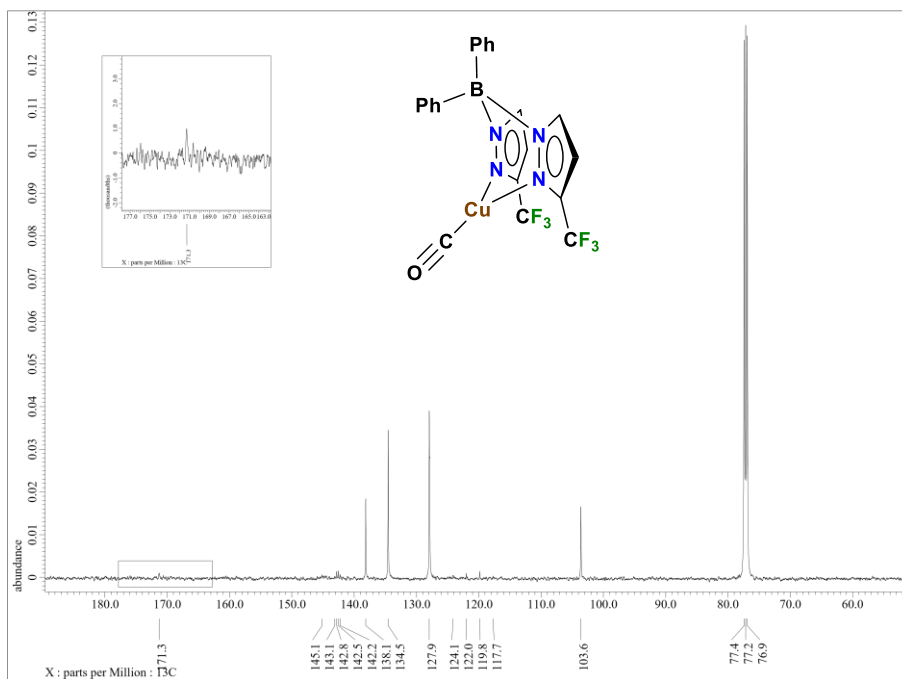

Figure S34:  $^{13}\text{C}$  NMR Spectrum of  $[\text{Ph}_2\text{B}(3\text{-CF}_3)\text{Pz}]_2\text{Cu}(\text{CO})$  in  $\text{CDCl}_3$ .

Supporting Information

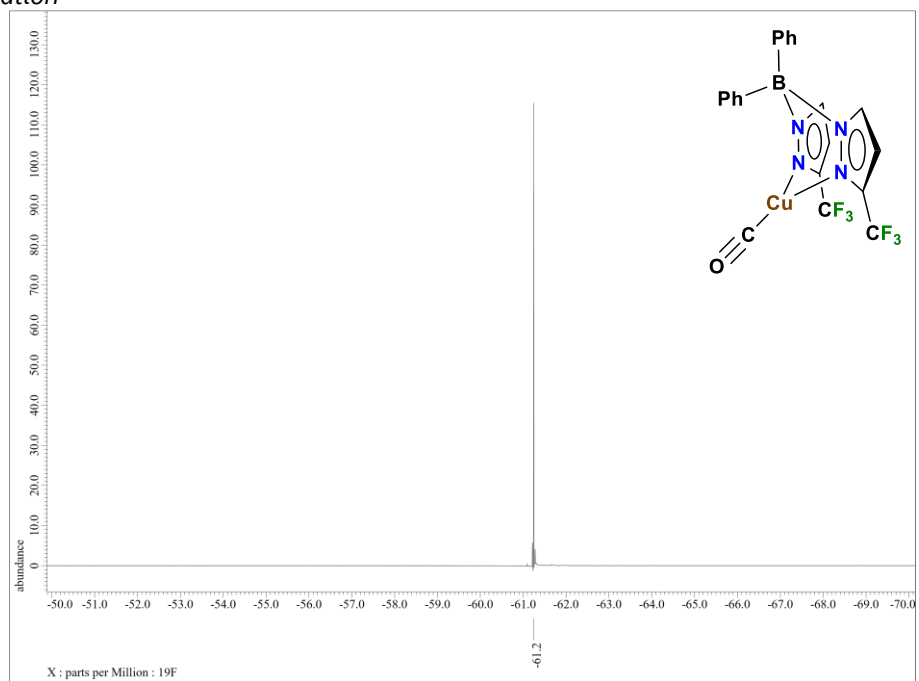

Figure S35:  $^{19}\text{F}$  NMR Spectrum of  $[\text{Ph}_2\text{B}(\text{3-CF}_3\text{Pz})_2]\text{Cu}(\text{CO})$  in  $\text{CDCl}_3$ .

## X-ray Data Collection and Structure Determinations

A suitable crystal covered with a layer of hydrocarbon/Paratone-N oil was selected and mounted on a Cryo-loop, and immediately placed in the low-temperature nitrogen stream. The X-ray intensity data of  $[\text{Ph}_2\text{B}(3\text{-(SF}_5\text{)Pz})_2]\text{Cu}(\text{C}_2\text{H}_4)$  and  $[\text{Ph}_2\text{B}(3\text{-(CF}_3\text{)Pz})_2]\text{Cu}(\text{C}_2\text{H}_4)$  were measured at 100 K, on a Bruker system with a SMART APEX II CCD area detector system, while data of  $[\text{Ph}_2\text{B}(3\text{-(SF}_5\text{)Pz})_2]\text{Cu}(\text{CO})$  and  $[\text{Ph}_2\text{B}(3\text{-(CF}_3\text{)Pz})_2]\text{Cu}(\text{CO})$  were measured at 100(2) K on a Bruker D8 Quest with a PHOTON II 7 CPAD detector. Both instruments were equipped with an Oxford Cryosystems 700 series cooler, a graphite monochromator, and a Mo  $\text{K}\alpha$  fine-focus sealed tube ( $\lambda = 0.71073 \text{ \AA}$ ). Intensity data were processed using the Bruker Apex program suite. Absorption corrections were applied by using SADABS.<sup>6</sup> Initial atomic positions were located by SHELXT,<sup>7</sup> and the structures of the compounds were refined by the least-squares method using SHELXL<sup>8</sup> within Olex2 GUI.<sup>9</sup> All the non-hydrogen atoms were refined anisotropically. The hydrogen atoms of ethylene moieties of  $[\text{Ph}_2\text{B}(3\text{-(SF}_5\text{)Pz})_2]\text{Cu}(\text{C}_2\text{H}_4)$  and  $[\text{Ph}_2\text{B}(3\text{-(CF}_3\text{)Pz})_2]\text{Cu}(\text{C}_2\text{H}_4)$  were located in difference Fourier maps, included and refined freely with isotropic displacement parameters. The remaining hydrogen atoms were included in their calculated positions and refined as riding on the atoms to which they are joined. The  $[\text{Ph}_2\text{B}(3\text{-(SF}_5\text{)Pz})_2]\text{Cu}(\text{C}_2\text{H}_4)$  and  $[\text{Ph}_2\text{B}(3\text{-(SF}_5\text{)Pz})_2]\text{Cu}(\text{CO})$  complexes crystallize in  $\overline{\text{P1}}$  space group with two chemically identical molecules in the asymmetric unit. X-ray structural figures were generated using Olex2.<sup>9</sup> The CCDC 2104704-2104707 files contain the supplementary crystallographic data. These data can be obtained free of charge via <http://www.ccdc.cam.ac.uk/conts/retrieving.html> or from the Cambridge Crystallographic Data Centre (CCDC), 12 Union Road, Cambridge, CB2 1EZ, UK).

## Supporting Information

**Table S3.** Selected bond distances (Å) and angles (°) of copper(I) complexes. Data for the second molecule in the asymmetric unit in *italics*.

| Parameter      | [Ph <sub>2</sub> B(3-(SF <sub>5</sub> )Pz) <sub>2</sub> ]<br>Cu(C <sub>2</sub> H <sub>4</sub> ) | [Ph <sub>2</sub> B(3-<br>CF <sub>3</sub> )Pz) <sub>2</sub> ]Cu(C <sub>2</sub> H <sub>4</sub> ) | [Ph <sub>2</sub> B(3-<br>SF <sub>5</sub> )Pz <sub>2</sub> ]Cu(CO)  | [Ph <sub>2</sub> B(3-<br>CF <sub>3</sub> )Pz) <sub>2</sub> ]Cu(CO) |
|----------------|-------------------------------------------------------------------------------------------------|------------------------------------------------------------------------------------------------|--------------------------------------------------------------------|--------------------------------------------------------------------|
| C=C            | 1.369(2)<br><i>1.353(2)</i>                                                                     | 1.3750(17)                                                                                     | -                                                                  | -                                                                  |
| C≡O            | -                                                                                               | -                                                                                              | 1.120(2)<br><i>1.121(2)</i>                                        | 1.119(2)                                                           |
| Cu-C           | 2.0199(13)<br>2.0225(13)<br><i>2.0307(14)</i><br><i>2.0230(15)</i>                              | 2.0123(11)<br>2.0184(11)                                                                       | 1.803(2)<br><i>1.807(2)</i>                                        | 1.8028(16)                                                         |
| Cu••C(Phenyl)  | 2.875<br><i>2.723</i>                                                                           | 2.957                                                                                          | 2.643<br><i>2.510</i>                                              | 2.778                                                              |
| Cu-N           | 1.9937(10)<br>1.9870(10)<br><i>1.9980(10)</i><br><i>2.0075(11)</i>                              | 1.9745(8)<br>1.9795(8)                                                                         | 2.0054(15)<br>1.9910(15)<br><i>2.0154(15)</i><br><i>2.0094(16)</i> | 1.9871(11)<br>1.9838(10)                                           |
| N-Cu-N         | 93.05(4)<br><i>92.30(4)</i>                                                                     | 95.12(3)                                                                                       | 92.50(6)<br><i>91.24(6)</i>                                        | 93.92(4)                                                           |
| C-Cu-C         | 39.59(6)<br><i>39.00(6)</i>                                                                     | 39.89(5)                                                                                       | -                                                                  | -                                                                  |
| Cu-C-O         | -                                                                                               | -                                                                                              | 179.3(2)<br><i>172.2(2)</i>                                        | 176.4(2)                                                           |
| N-Cu-C         | -                                                                                               | -                                                                                              | 134.34(8)<br>131.12(8)<br><i>130.38(8)</i><br><i>138.06(8)</i>     | 137.21(6)<br>128.47(6)                                             |
| Σ angles at Cu | 359.42<br><i>360.00</i>                                                                         | 359.98                                                                                         | 357.96<br><i>359.68</i>                                            | 359.61                                                             |

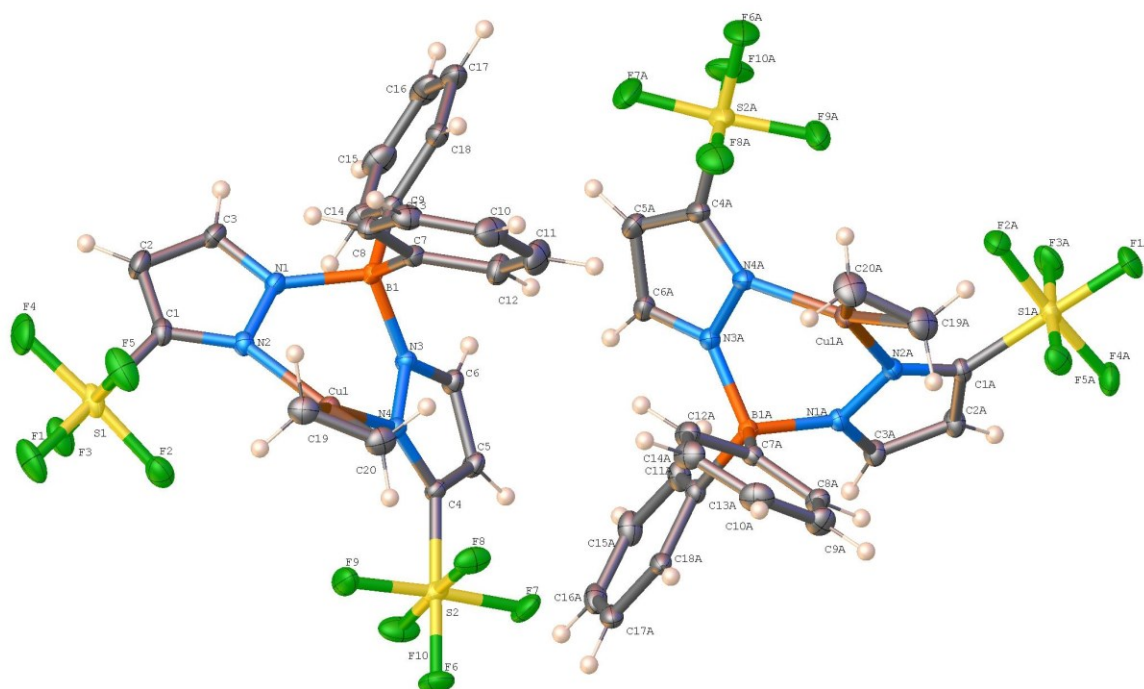

**Figure S36:** Molecular structure and atom labelling scheme of  $[\text{Ph}_2\text{B}(\text{3}-(\text{SF}_5)\text{Pz})_2]\text{Cu}(\text{C}_2\text{H}_4)$ .

**Table S4:** Crystal data and structure refinement for  $[\text{Ph}_2\text{B}(\text{3}-(\text{SF}_5)\text{Pz})_2]\text{Cu}(\text{C}_2\text{H}_4)$ .

|                     |                                                                  |
|---------------------|------------------------------------------------------------------|
| Identification code | rad992_0m_a                                                      |
| Empirical formula   | $\text{C}_{20}\text{H}_{18}\text{BCuF}_{10}\text{N}_4\text{S}_2$ |
| Formula weight      | 642.85                                                           |
| Temperature/K       | 100.0                                                            |
| Crystal system      | triclinic                                                        |
| Space group         | P-1                                                              |
| a/Å                 | 11.6035(8)                                                       |
| b/Å                 | 14.7339(11)                                                      |
| c/Å                 | 15.7485(11)                                                      |
| $\alpha^\circ$      | 80.1640(10)                                                      |



*Supporting Information*

|                                                |                                                                   |
|------------------------------------------------|-------------------------------------------------------------------|
| $\beta/^\circ$                                 | 76.2550(10)                                                       |
| $\gamma/^\circ$                                | 68.3860(10)                                                       |
| Volume/ $\text{\AA}^3$                         | 2421.1(3)                                                         |
| Z                                              | 4                                                                 |
| $\rho_{\text{calc}}/\text{g}/\text{cm}^3$      | 1.764                                                             |
| $\mu/\text{mm}^{-1}$                           | 1.171                                                             |
| F(000)                                         | 1288.0                                                            |
| Crystal size/ $\text{mm}^3$                    | 0.36 × 0.33 × 0.27                                                |
| Radiation                                      | MoK $\alpha$ ( $\lambda = 0.71073$ )                              |
| 2 $\theta$ range for data collection/ $^\circ$ | 3.846 to 66.378                                                   |
| Index ranges                                   | -17 ≤ h ≤ 17, -22 ≤ k ≤ 22, -24 ≤ l ≤ 23                          |
| Reflections collected                          | 32946                                                             |
| Independent reflections                        | 17011 [ $R_{\text{int}} = 0.0154$ , $R_{\text{sigma}} = 0.0251$ ] |
| Data/restraints/parameters                     | 17011/0/717                                                       |
| Goodness-of-fit on $F^2$                       | 1.015                                                             |
| Final R indexes [ $I > 2\sigma(I)$ ]           | $R_1 = 0.0294$ , $wR_2 = 0.0778$                                  |
| Final R indexes [all data]                     | $R_1 = 0.0346$ , $wR_2 = 0.0805$                                  |
| Largest diff. peak/hole / $e \text{\AA}^{-3}$  | 0.89/-0.58                                                        |

**Table S5:** Bond Lengths for **[Ph<sub>2</sub>B(3-(SF<sub>5</sub>)Pz)<sub>2</sub>]Cu(C<sub>2</sub>H<sub>4</sub>)**.

| Atom | Atom | Length/ $\text{\AA}$ | Atom | Atom | Length/ $\text{\AA}$ |
|------|------|----------------------|------|------|----------------------|
| Cu1  | N2   | 1.9937(10)           | Cu1A | N2A  | 1.9980(10)           |
| Cu1  | N4   | 1.9870(10)           | Cu1A | N4A  | 2.0075(11)           |
| Cu1  | C19  | 2.0199(13)           | Cu1A | C19A | 2.0307(14)           |
| Cu1  | C20  | 2.0225(13)           | Cu1A | C20A | 2.0230(15)           |
| S1   | F1   | 1.5828(10)           | S1A  | F1A  | 1.5775(9)            |
| S1   | F2   | 1.5792(10)           | S1A  | F2A  | 1.5866(9)            |
| S1   | F3   | 1.5839(9)            | S1A  | F3A  | 1.5834(9)            |
| S1   | F4   | 1.5744(11)           | S1A  | F4A  | 1.5843(9)            |
| S1   | F5   | 1.5867(9)            | S1A  | F5A  | 1.5855(9)            |
| S1   | C1   | 1.7864(13)           | S1A  | C1A  | 1.7821(12)           |

Supporting Information

**Table S5:** Bond Lengths for  $[\text{Ph}_2\text{B}(\text{3}-(\text{SF}_5)\text{Pz})_2]\text{Cu}(\text{C}_2\text{H}_4)$ .

| Atom | Atom | Length/Å   | Atom | Atom | Length/Å   |
|------|------|------------|------|------|------------|
| S2   | F6   | 1.5825(9)  | S2A  | F6A  | 1.5804(10) |
| S2   | F7   | 1.5765(9)  | S2A  | F7A  | 1.5741(10) |
| S2   | F8   | 1.5830(9)  | S2A  | F8A  | 1.5804(12) |
| S2   | F9   | 1.5824(9)  | S2A  | F9A  | 1.5836(10) |
| S2   | F10  | 1.5796(9)  | S2A  | F10A | 1.5824(13) |
| S2   | C4   | 1.7846(12) | S2A  | C4A  | 1.7828(14) |
| N1   | N2   | 1.3612(14) | N1A  | N2A  | 1.3612(14) |
| N1   | C3   | 1.3491(15) | N1A  | C3A  | 1.3475(15) |
| N1   | B1   | 1.5881(16) | N1A  | B1A  | 1.5853(16) |
| N2   | C1   | 1.3377(15) | N2A  | C1A  | 1.3393(15) |
| N3   | N4   | 1.3608(14) | N3A  | N4A  | 1.3611(14) |
| N3   | C6   | 1.3497(15) | N3A  | C6A  | 1.3476(16) |
| N3   | B1   | 1.5916(16) | N3A  | B1A  | 1.5935(16) |
| N4   | C4   | 1.3405(15) | N4A  | C4A  | 1.3371(15) |
| C1   | C2   | 1.3907(19) | C1A  | C2A  | 1.3914(17) |
| C2   | C3   | 1.3812(19) | C2A  | C3A  | 1.3838(17) |
| C4   | C5   | 1.3906(17) | C4A  | C5A  | 1.392(2)   |
| C5   | C6   | 1.3825(17) | C5A  | C6A  | 1.3828(19) |
| C7   | C8   | 1.3982(17) | C7A  | C8A  | 1.4037(17) |
| C7   | C12  | 1.4040(17) | C7A  | C12A | 1.4052(16) |
| C7   | B1   | 1.6152(18) | C7A  | B1A  | 1.6162(18) |
| C8   | C9   | 1.3963(18) | C8A  | C9A  | 1.3959(18) |
| C9   | C10  | 1.388(2)   | C9A  | C10A | 1.391(2)   |
| C10  | C11  | 1.395(2)   | C10A | C11A | 1.391(2)   |
| C11  | C12  | 1.387(2)   | C11A | C12A | 1.3926(19) |
| C13  | C14  | 1.4054(19) | C13A | C14A | 1.4094(18) |
| C13  | C18  | 1.4032(18) | C13A | C18A | 1.4026(17) |
| C13  | B1   | 1.6134(18) | C13A | B1A  | 1.6116(17) |
| C14  | C15  | 1.397(2)   | C14A | C15A | 1.3889(19) |

Supporting Information

**Table S5:** Bond Lengths for [Ph<sub>2</sub>B(3-(SF<sub>5</sub>)Pz)<sub>2</sub>]Cu(C<sub>2</sub>H<sub>4</sub>).

| Atom | Atom | Length/Å   | Atom | Atom | Length/Å   |
|------|------|------------|------|------|------------|
| C15  | C16  | 1.385(2)   | C15A | C16A | 1.391(2)   |
| C16  | C17  | 1.389(2)   | C16A | C17A | 1.384(2)   |
| C17  | C18  | 1.3983(19) | C17A | C18A | 1.3991(17) |
| C19  | C20  | 1.369(2)   | C19A | C20A | 1.353(2)   |

**Table S6:** Bond Angles for [Ph<sub>2</sub>B(3-(SF<sub>5</sub>)Pz)<sub>2</sub>]Cu(C<sub>2</sub>H<sub>4</sub>).

| Atom | Atom | Atom | Angle/°   | Atom | Atom | Atom | Angle/°   |
|------|------|------|-----------|------|------|------|-----------|
| N2   | Cu1  | C19  | 110.98(5) | N2A  | Cu1A | N4A  | 92.30(4)  |
| N2   | Cu1  | C20  | 149.44(5) | N2A  | Cu1A | C19A | 112.86(5) |
| N4   | Cu1  | N2   | 93.05(4)  | N2A  | Cu1A | C20A | 151.59(6) |
| N4   | Cu1  | C19  | 155.78(5) | N4A  | Cu1A | C19A | 154.79(6) |
| N4   | Cu1  | C20  | 116.21(5) | N4A  | Cu1A | C20A | 115.99(6) |
| C19  | Cu1  | C20  | 39.59(6)  | C20A | Cu1A | C19A | 39.00(6)  |
| F1   | S1   | F3   | 87.63(5)  | F1A  | S1A  | F2A  | 87.97(5)  |
| F1   | S1   | F5   | 88.02(5)  | F1A  | S1A  | F3A  | 88.31(5)  |
| F1   | S1   | C1   | 179.05(6) | F1A  | S1A  | F4A  | 88.25(5)  |
| F2   | S1   | F1   | 87.80(6)  | F1A  | S1A  | F5A  | 87.92(5)  |
| F2   | S1   | F3   | 89.69(5)  | F1A  | S1A  | C1A  | 179.46(6) |
| F2   | S1   | F5   | 89.94(6)  | F2A  | S1A  | C1A  | 92.56(5)  |
| F2   | S1   | C1   | 92.91(5)  | F3A  | S1A  | F2A  | 89.93(5)  |
| F3   | S1   | F5   | 175.65(5) | F3A  | S1A  | F4A  | 89.77(5)  |
| F3   | S1   | C1   | 91.73(5)  | F3A  | S1A  | F5A  | 176.23(5) |
| F4   | S1   | F1   | 88.05(6)  | F3A  | S1A  | C1A  | 91.77(5)  |
| F4   | S1   | F2   | 175.85(6) | F4A  | S1A  | F2A  | 176.22(5) |
| F4   | S1   | F3   | 89.97(6)  | F4A  | S1A  | F5A  | 89.99(5)  |
| F4   | S1   | F5   | 90.08(6)  | F4A  | S1A  | C1A  | 91.21(5)  |
| F4   | S1   | C1   | 91.23(6)  | F5A  | S1A  | F2A  | 90.06(5)  |
| F5   | S1   | C1   | 92.62(6)  | F5A  | S1A  | C1A  | 92.00(5)  |

## Supporting Information

**Table S6:** Bond Angles for [Ph<sub>2</sub>B(3-(SF<sub>5</sub>)Pz)<sub>2</sub>]Cu(C<sub>2</sub>H<sub>4</sub>).

| Atom | Atom | Atom | Angle/°    | Atom | Atom | Atom | Angle/°    |
|------|------|------|------------|------|------|------|------------|
| F6   | S2   | F8   | 87.83(5)   | F6A  | S2A  | F9A  | 87.89(6)   |
| F6   | S2   | C4   | 179.44(5)  | F6A  | S2A  | F10A | 88.35(7)   |
| F7   | S2   | F6   | 87.95(5)   | F6A  | S2A  | C4A  | 179.57(6)  |
| F7   | S2   | F8   | 89.93(5)   | F7A  | S2A  | F6A  | 88.07(6)   |
| F7   | S2   | F9   | 175.97(5)  | F7A  | S2A  | F8A  | 89.80(7)   |
| F7   | S2   | F10  | 90.01(6)   | F7A  | S2A  | F9A  | 175.96(6)  |
| F7   | S2   | C4   | 91.53(5)   | F7A  | S2A  | F10A | 90.16(7)   |
| F8   | S2   | C4   | 92.36(5)   | F7A  | S2A  | C4A  | 91.56(6)   |
| F9   | S2   | F6   | 88.03(5)   | F8A  | S2A  | F6A  | 88.00(7)   |
| F9   | S2   | F8   | 89.79(5)   | F8A  | S2A  | F9A  | 89.80(6)   |
| F9   | S2   | C4   | 92.50(5)   | F8A  | S2A  | F10A | 176.35(6)  |
| F10  | S2   | F6   | 88.11(5)   | F8A  | S2A  | C4A  | 92.23(6)   |
| F10  | S2   | F8   | 175.94(5)  | F9A  | S2A  | C4A  | 92.48(6)   |
| F10  | S2   | F9   | 89.98(6)   | F10A | S2A  | F9A  | 89.98(7)   |
| F10  | S2   | C4   | 91.69(5)   | F10A | S2A  | C4A  | 91.42(7)   |
| N2   | N1   | B1   | 120.67(9)  | N2A  | N1A  | B1A  | 119.01(9)  |
| C3   | N1   | N2   | 109.87(10) | C3A  | N1A  | N2A  | 109.84(10) |
| C3   | N1   | B1   | 129.27(10) | C3A  | N1A  | B1A  | 131.12(10) |
| N1   | N2   | Cu1  | 113.98(7)  | N1A  | N2A  | Cu1A | 113.70(7)  |
| C1   | N2   | Cu1  | 139.69(9)  | C1A  | N2A  | Cu1A | 140.69(8)  |
| C1   | N2   | N1   | 105.59(10) | C1A  | N2A  | N1A  | 105.60(10) |
| N4   | N3   | B1   | 119.52(9)  | N4A  | N3A  | B1A  | 118.04(9)  |
| C6   | N3   | N4   | 109.75(10) | C6A  | N3A  | N4A  | 109.81(10) |
| C6   | N3   | B1   | 130.39(10) | C6A  | N3A  | B1A  | 132.06(10) |
| N3   | N4   | Cu1  | 115.04(7)  | N3A  | N4A  | Cu1A | 114.13(7)  |
| C4   | N4   | Cu1  | 139.33(8)  | C4A  | N4A  | Cu1A | 140.06(9)  |
| C4   | N4   | N3   | 105.63(10) | C4A  | N4A  | N3A  | 105.65(10) |
| N2   | C1   | S1   | 121.54(10) | N2A  | C1A  | S1A  | 121.83(9)  |
| N2   | C1   | C2   | 111.90(11) | N2A  | C1A  | C2A  | 111.94(10) |

## Supporting Information

**Table S6:** Bond Angles for [Ph<sub>2</sub>B(3-(SF<sub>5</sub>)Pz)<sub>2</sub>]Cu(C<sub>2</sub>H<sub>4</sub>).

| Atom | Atom | Atom | Angle/°    | Atom | Atom | Atom | Angle/°    |
|------|------|------|------------|------|------|------|------------|
| C2   | C1   | S1   | 126.49(10) | C2A  | C1A  | S1A  | 126.22(9)  |
| C3   | C2   | C1   | 103.67(11) | C3A  | C2A  | C1A  | 103.47(10) |
| N1   | C3   | C2   | 108.97(12) | N1A  | C3A  | C2A  | 109.13(11) |
| N4   | C4   | S2   | 121.10(9)  | N4A  | C4A  | S2A  | 121.37(10) |
| N4   | C4   | C5   | 111.92(10) | N4A  | C4A  | C5A  | 111.95(11) |
| C5   | C4   | S2   | 126.98(9)  | C5A  | C4A  | S2A  | 126.68(10) |
| C6   | C5   | C4   | 103.54(10) | C6A  | C5A  | C4A  | 103.44(11) |
| N3   | C6   | C5   | 109.15(11) | N3A  | C6A  | C5A  | 109.15(12) |
| C8   | C7   | C12  | 116.70(12) | C8A  | C7A  | C12A | 116.84(11) |
| C8   | C7   | B1   | 123.75(10) | C8A  | C7A  | B1A  | 122.57(10) |
| C12  | C7   | B1   | 119.55(11) | C12A | C7A  | B1A  | 120.55(10) |
| C9   | C8   | C7   | 122.03(12) | C9A  | C8A  | C7A  | 121.60(11) |
| C10  | C9   | C8   | 119.96(13) | C10A | C9A  | C8A  | 120.16(12) |
| C9   | C10  | C11  | 119.11(13) | C9A  | C10A | C11A | 119.41(13) |
| C12  | C11  | C10  | 120.34(13) | C10A | C11A | C12A | 120.00(12) |
| C11  | C12  | C7   | 121.80(13) | C11A | C12A | C7A  | 121.89(12) |
| C14  | C13  | B1   | 121.85(11) | C14A | C13A | B1A  | 123.10(11) |
| C18  | C13  | C14  | 116.82(12) | C18A | C13A | C14A | 116.38(11) |
| C18  | C13  | B1   | 121.33(12) | C18A | C13A | B1A  | 120.49(11) |
| C15  | C14  | C13  | 121.97(14) | C15A | C14A | C13A | 121.97(12) |
| C16  | C15  | C14  | 119.84(15) | C14A | C15A | C16A | 120.22(13) |
| C15  | C16  | C17  | 119.67(13) | C17A | C16A | C15A | 119.36(12) |
| C16  | C17  | C18  | 120.26(14) | C16A | C17A | C18A | 120.15(12) |
| C17  | C18  | C13  | 121.43(14) | C17A | C18A | C13A | 121.90(12) |
| C20  | C19  | Cu1  | 70.31(8)   | C20A | C19A | Cu1A | 70.19(9)   |
| C19  | C20  | Cu1  | 70.10(8)   | C19A | C20A | Cu1A | 70.81(9)   |
| N1   | B1   | N3   | 106.20(9)  | N1A  | B1A  | N3A  | 104.80(9)  |
| N1   | B1   | C7   | 109.61(10) | N1A  | B1A  | C7A  | 109.71(9)  |
| N1   | B1   | C13  | 109.15(9)  | N1A  | B1A  | C13A | 110.11(9)  |

*Supporting Information*

**Table S6:** Bond Angles for  $[\text{Ph}_2\text{B}(\text{3-(SF}_5\text{)Pz})_2]\text{Cu}(\text{C}_2\text{H}_4)$ .

| <b>Atom</b> | <b>Atom</b> | <b>Atom</b> | <b>Angle/°</b> | <b>Atom</b> | <b>Atom</b> | <b>Atom</b> | <b>Angle/°</b> |
|-------------|-------------|-------------|----------------|-------------|-------------|-------------|----------------|
| N3          | B1          | C7          | 106.25(9)      | N3A         | B1A         | C7A         | 106.77(9)      |
| N3          | B1          | C13         | 108.92(10)     | N3A         | B1A         | C13A        | 110.05(9)      |
| C13         | B1          | C7          | 116.22(10)     | C13A        | B1A         | C7A         | 114.87(10)     |

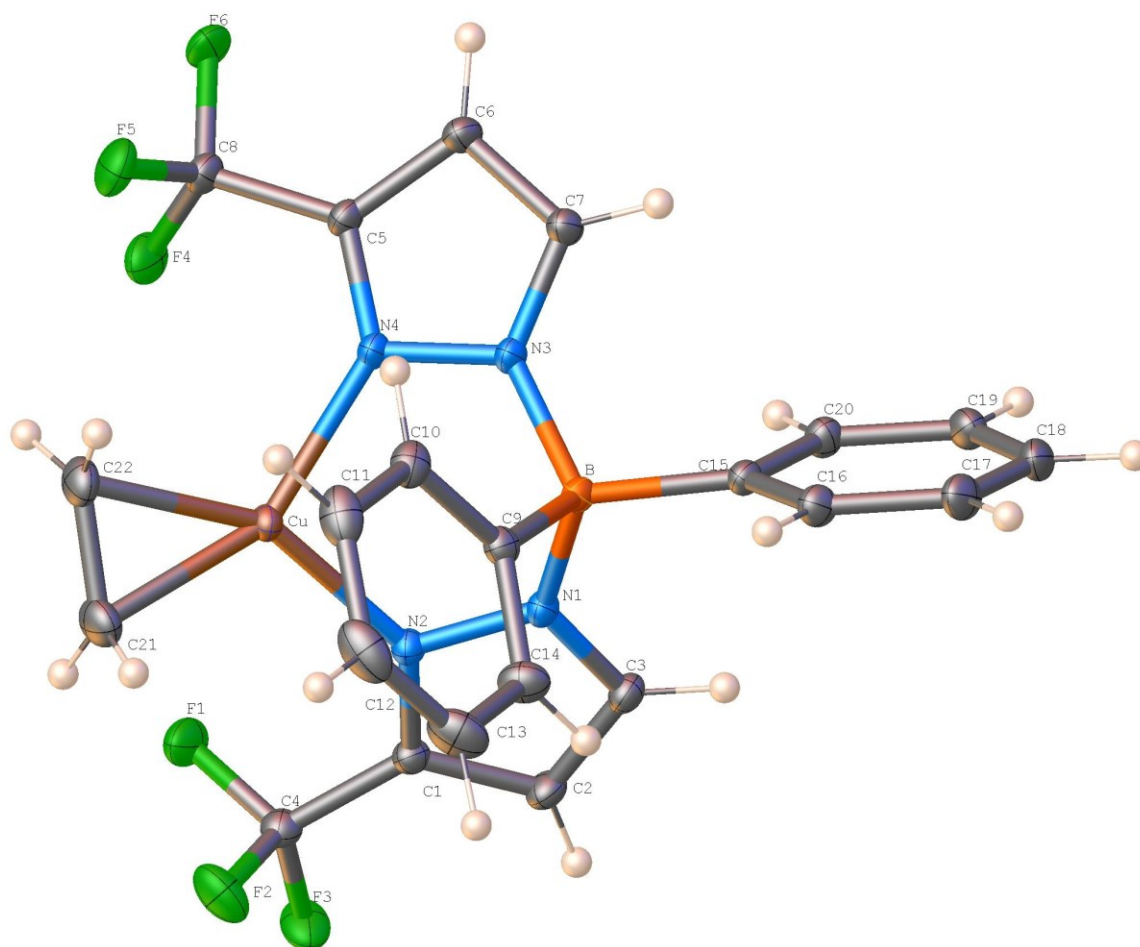

**Figure S37:** Molecular structure and atom labelling scheme of  $[\text{Ph}_2\text{B}(\text{3-CF}_3)\text{Pz}]_2\text{Cu}(\text{C}_2\text{H}_4)$ .

**Table S7:** Crystal data and structure refinement for  $[\text{Ph}_2\text{B}(\text{3-CF}_3)\text{Pz}]_2\text{Cu}(\text{C}_2\text{H}_4)$ .

|                     |                                                     |
|---------------------|-----------------------------------------------------|
| Identification code | rad994_0m_a                                         |
| Empirical formula   | $\text{C}_{22}\text{H}_{18}\text{BCuF}_6\text{N}_4$ |
| Formula weight      | 526.75                                              |
| Temperature/K       | 100                                                 |
| Crystal system      | triclinic                                           |

*Supporting Information*

|                                                |                                                               |
|------------------------------------------------|---------------------------------------------------------------|
| Space group                                    | P-1                                                           |
| a/Å                                            | 9.9858(7)                                                     |
| b/Å                                            | 10.2229(7)                                                    |
| c/Å                                            | 12.0676(8)                                                    |
| $\alpha/^\circ$                                | 79.9490(10)                                                   |
| $\beta/^\circ$                                 | 66.8730(10)                                                   |
| $\gamma/^\circ$                                | 77.9780(10)                                                   |
| Volume/Å <sup>3</sup>                          | 1102.16(13)                                                   |
| Z                                              | 2                                                             |
| $\rho_{\text{calc}}/\text{cm}^3$               | 1.587                                                         |
| $\mu/\text{mm}^{-1}$                           | 1.059                                                         |
| F(000)                                         | 532.0                                                         |
| Crystal size/mm <sup>3</sup>                   | 0.45 × 0.43 × 0.19                                            |
| Radiation                                      | MoK $\alpha$ ( $\lambda = 0.71073$ )                          |
| 2 $\theta$ range for data collection/ $^\circ$ | 4.096 to 66.034                                               |
| Index ranges                                   | -14 ≤ h ≤ 15, -15 ≤ k ≤ 15, -18 ≤ l ≤ 17                      |
| Reflections collected                          | 14954                                                         |
| Independent reflections                        | 7733 [R <sub>int</sub> = 0.0135, R <sub>sigma</sub> = 0.0190] |
| Data/restraints/parameters                     | 7733/0/323                                                    |
| Goodness-of-fit on F <sup>2</sup>              | 1.030                                                         |
| Final R indexes [ $I > 2\sigma(I)$ ]           | R <sub>1</sub> = 0.0250, wR <sub>2</sub> = 0.0701             |
| Final R indexes [all data]                     | R <sub>1</sub> = 0.0265, wR <sub>2</sub> = 0.0710             |
| Largest diff. peak/hole / e Å <sup>-3</sup>    | 0.55/-0.34                                                    |

**Table S8:** Bond Lengths for [Ph<sub>2</sub>B(3-CF<sub>3</sub>)Pz]<sub>2</sub>Cu(C<sub>2</sub>H<sub>4</sub>).

| Atom | Atom | Length/Å   | Atom | Atom | Length/Å   |
|------|------|------------|------|------|------------|
| Cu   | N2   | 1.9745(8)  | C2   | C3   | 1.3887(14) |
| Cu   | N4   | 1.9795(8)  | C5   | C6   | 1.3929(14) |
| Cu   | C21  | 2.0123(11) | C5   | C8   | 1.4881(13) |



Supporting Information

**Table S8:** Bond Lengths for [Ph<sub>2</sub>B(3-CF<sub>3</sub>)Pz]<sub>2</sub>Cu(C<sub>2</sub>H<sub>4</sub>).

| Atom | Atom | Length/Å   | Atom | Atom | Length/Å   |
|------|------|------------|------|------|------------|
| Cu   | C22  | 2.0184(11) | C6   | C7   | 1.3883(13) |
| F1   | C4   | 1.3388(12) | C9   | C10  | 1.3993(14) |
| F2   | C4   | 1.3432(13) | C9   | C14  | 1.4079(14) |
| F3   | C4   | 1.3375(12) | C9   | B    | 1.6205(14) |
| F4   | C8   | 1.3398(12) | C10  | C11  | 1.4032(16) |
| F5   | C8   | 1.3448(13) | C11  | C12  | 1.386(2)   |
| F6   | C8   | 1.3393(12) | C12  | C13  | 1.387(2)   |
| N1   | N2   | 1.3623(11) | C13  | C14  | 1.3898(16) |
| N1   | C3   | 1.3473(12) | C15  | C16  | 1.4009(13) |
| N1   | B    | 1.5935(13) | C15  | C20  | 1.4078(14) |
| N2   | C1   | 1.3412(12) | C15  | B    | 1.6170(14) |
| N3   | N4   | 1.3648(11) | C16  | C17  | 1.3979(15) |
| N3   | C7   | 1.3466(12) | C17  | C18  | 1.3892(17) |
| N3   | B    | 1.5779(13) | C18  | C19  | 1.3920(17) |
| N4   | C5   | 1.3409(12) | C19  | C20  | 1.3952(14) |
| C1   | C2   | 1.3937(14) | C21  | C22  | 1.3750(17) |
| C1   | C4   | 1.4866(14) |      |      |            |

**Table S9:** Bond Angles for [Ph<sub>2</sub>B(3-CF<sub>3</sub>)Pz]<sub>2</sub>Cu(C<sub>2</sub>H<sub>4</sub>).

| Atom | Atom | Atom | Angle/°   | Atom | Atom | Atom | Angle/°   |
|------|------|------|-----------|------|------|------|-----------|
| N2   | Cu   | N4   | 95.12(3)  | C7   | C6   | C5   | 103.86(8) |
| N2   | Cu   | C21  | 113.95(4) | N3   | C7   | C6   | 108.93(9) |
| N2   | Cu   | C22  | 153.68(4) | F4   | C8   | F5   | 106.31(9) |
| N4   | Cu   | C21  | 150.78(4) | F4   | C8   | C5   | 112.89(8) |
| N4   | Cu   | C22  | 111.18(4) | F5   | C8   | C5   | 112.89(9) |
| C21  | Cu   | C22  | 39.89(5)  | F6   | C8   | F4   | 107.55(9) |
| N2   | N1   | B    | 119.24(7) | F6   | C8   | F5   | 106.74(9) |
| C3   | N1   | N2   | 109.68(8) | F6   | C8   | C5   | 110.13(9) |

Supporting Information

**Table S9:** Bond Angles for  $[\text{Ph}_2\text{B}(\text{3-CF}_3\text{Pz})_2]\text{Cu}(\text{C}_2\text{H}_4)$ .

| Atom | Atom | Atom | Angle/°   | Atom | Atom | Atom | Angle/°    |
|------|------|------|-----------|------|------|------|------------|
| C3   | N1   | B    | 130.31(8) | C10  | C9   | C14  | 116.82(9)  |
| N1   | N2   | Cu   | 116.35(6) | C10  | C9   | B    | 124.10(9)  |
| C1   | N2   | Cu   | 136.87(7) | C14  | C9   | B    | 119.06(9)  |
| C1   | N2   | N1   | 106.16(8) | C9   | C10  | C11  | 121.60(10) |
| N4   | N3   | B    | 120.33(8) | C12  | C11  | C10  | 119.97(11) |
| C7   | N3   | N4   | 109.78(8) | C11  | C12  | C13  | 119.57(11) |
| C7   | N3   | B    | 129.57(8) | C12  | C13  | C14  | 120.23(12) |
| N3   | N4   | Cu   | 116.47(6) | C13  | C14  | C9   | 121.76(11) |
| C5   | N4   | Cu   | 136.81(7) | C16  | C15  | C20  | 116.70(9)  |
| C5   | N4   | N3   | 105.97(8) | C16  | C15  | B    | 121.72(9)  |
| N2   | C1   | C2   | 111.35(9) | C20  | C15  | B    | 121.56(8)  |
| N2   | C1   | C4   | 120.70(9) | C17  | C16  | C15  | 121.83(10) |
| C2   | C1   | C4   | 127.93(9) | C18  | C17  | C16  | 120.07(10) |
| C3   | C2   | C1   | 103.79(9) | C17  | C18  | C19  | 119.59(10) |
| N1   | C3   | C2   | 109.02(9) | C18  | C19  | C20  | 119.81(10) |
| F1   | C4   | F2   | 106.11(9) | C19  | C20  | C15  | 121.98(10) |
| F1   | C4   | C1   | 113.00(8) | C22  | C21  | Cu   | 70.30(6)   |
| F2   | C4   | C1   | 112.63(9) | C21  | C22  | Cu   | 69.81(6)   |
| F3   | C4   | F1   | 107.02(9) | N1   | B    | C9   | 105.49(7)  |
| F3   | C4   | F2   | 106.49(9) | N1   | B    | C15  | 109.00(8)  |
| F3   | C4   | C1   | 111.16(8) | N3   | B    | N1   | 106.25(7)  |
| N4   | C5   | C6   | 111.45(8) | N3   | B    | C9   | 109.52(8)  |
| N4   | C5   | C8   | 121.09(9) | N3   | B    | C15  | 110.01(8)  |
| C6   | C5   | C8   | 127.46(9) | C15  | B    | C9   | 116.04(8)  |

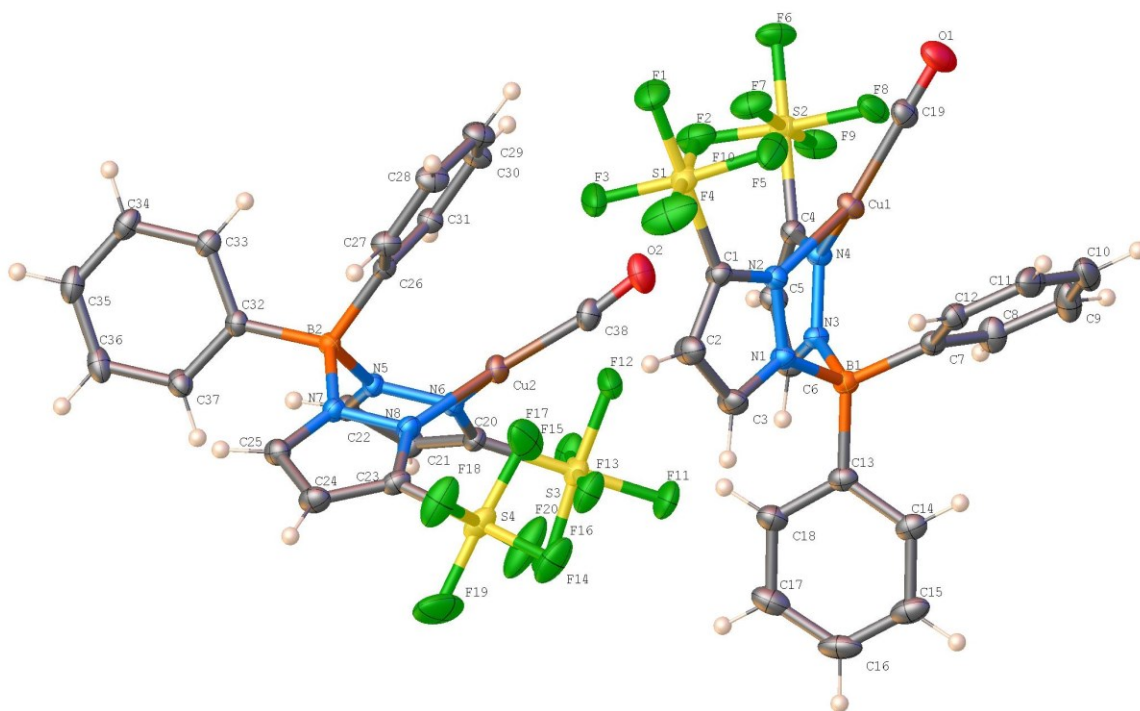

**Figure S38:** Molecular structure and atom labelling scheme of  $[\text{Ph}_2\text{B}(3\text{-SF}_5)\text{Pz}_2]\text{Cu}(\text{CO})$ .

**Table S10:** Crystal data and structure refinement for  $[\text{Ph}_2\text{B}(3\text{-SF}_5)\text{Pz}_2]\text{Cu}(\text{CO})$ .

|                     |                                                                   |
|---------------------|-------------------------------------------------------------------|
| Identification code | HRD9_0m_a                                                         |
| Empirical formula   | $\text{C}_{19}\text{H}_{14}\text{BCuF}_{10}\text{N}_4\text{OS}_2$ |
| Formula weight      | 642.81                                                            |
| Temperature/K       | 100.0                                                             |
| Crystal system      | triclinic                                                         |
| Space group         | P-1                                                               |
| a/Å                 | 11.5023(4)                                                        |
| b/Å                 | 14.7295(5)                                                        |
| c/Å                 | 15.6519(6)                                                        |

*Supporting Information*

|                                                |                                                                   |
|------------------------------------------------|-------------------------------------------------------------------|
| $\alpha/^\circ$                                | 80.195(2)                                                         |
| $\beta/^\circ$                                 | 74.824(2)                                                         |
| $\gamma/^\circ$                                | 68.378(2)                                                         |
| Volume/ $\text{\AA}^3$                         | 2371.16(15)                                                       |
| Z                                              | 4                                                                 |
| $\rho_{\text{calc}}/\text{cm}^3$               | 1.801                                                             |
| $\mu/\text{mm}^{-1}$                           | 1.198                                                             |
| F(000)                                         | 1280.0                                                            |
| Crystal size/ $\text{mm}^3$                    | 0.225 × 0.21 × 0.055                                              |
| Radiation                                      | Mo K $\alpha$ ( $\lambda = 0.71073$ )                             |
| 2 $\theta$ range for data collection/ $^\circ$ | 5.412 to 64.062                                                   |
| Index ranges                                   | -17 ≤ h ≤ 17, -21 ≤ k ≤ 21, -23 ≤ l ≤ 23                          |
| Reflections collected                          | 43095                                                             |
| Independent reflections                        | 16208 [ $R_{\text{int}} = 0.0282$ , $R_{\text{sigma}} = 0.0339$ ] |
| Data/restraints/parameters                     | 16208/0/686                                                       |
| Goodness-of-fit on $F^2$                       | 1.091                                                             |
| Final R indexes [ $I \geq 2\sigma(I)$ ]        | $R_1 = 0.0384$ , $wR_2 = 0.0822$                                  |
| Final R indexes [all data]                     | $R_1 = 0.0601$ , $wR_2 = 0.0959$                                  |
| Largest diff. peak/hole / e $\text{\AA}^{-3}$  | 0.59/-0.64                                                        |

**Table S11:** Bond Lengths for **[Ph<sub>2</sub>B(3-SF<sub>5</sub>)Pz<sub>2</sub>]Cu(CO)**.

| Atom | Atom | Length/ $\text{\AA}$ | Atom | Atom | Length/ $\text{\AA}$ |
|------|------|----------------------|------|------|----------------------|
| Cu1  | N2   | 2.0054(15)           | Cu2  | N8   | 2.0094(16)           |
| Cu1  | N4   | 1.9910(15)           | Cu2  | C26  | 2.5101(17)           |
| Cu1  | C19  | 1.803(2)             | Cu2  | C38  | 1.807(2)             |
| S1   | F1   | 1.5767(13)           | S3   | F11  | 1.5788(13)           |
| S1   | F2   | 1.5736(14)           | S3   | F12  | 1.5816(14)           |
| S1   | F3   | 1.5756(15)           | S3   | F13  | 1.5810(14)           |
| S1   | F4   | 1.5680(15)           | S3   | F14  | 1.5772(14)           |
| S1   | F5   | 1.5821(15)           | S3   | F15  | 1.5800(14)           |

**Table S11:** Bond Lengths for [Ph<sub>2</sub>B(3-SF<sub>5</sub>)Pz<sub>2</sub>]Cu(CO).

| Atom | Atom | Length/Å   | Atom | Atom | Length/Å   |
|------|------|------------|------|------|------------|
| S1   | C1   | 1.7816(19) | S3   | C20  | 1.7818(18) |
| S2   | F6   | 1.5822(13) | S4   | F16  | 1.5807(14) |
| S2   | F7   | 1.5808(13) | S4   | F17  | 1.5708(17) |
| S2   | F8   | 1.5786(14) | S4   | F18  | 1.5703(15) |
| S2   | F9   | 1.5737(13) | S4   | F19  | 1.5713(18) |
| S2   | F10  | 1.5795(14) | S4   | F20  | 1.5699(16) |
| S2   | C4   | 1.7870(18) | S4   | C23  | 1.786(2)   |
| O1   | C19  | 1.120(2)   | O2   | C38  | 1.121(3)   |
| N1   | N2   | 1.358(2)   | N5   | N6   | 1.360(2)   |
| N1   | C3   | 1.349(2)   | N5   | C22  | 1.347(2)   |
| N1   | B1   | 1.584(3)   | N5   | B2   | 1.590(2)   |
| N2   | C1   | 1.331(2)   | N6   | C20  | 1.329(2)   |
| N3   | N4   | 1.359(2)   | N7   | N8   | 1.363(2)   |
| N3   | C6   | 1.346(2)   | N7   | C25  | 1.349(2)   |
| N3   | B1   | 1.598(3)   | N7   | B2   | 1.596(2)   |
| N4   | C4   | 1.332(2)   | N8   | C23  | 1.336(2)   |
| C1   | C2   | 1.389(3)   | C20  | C21  | 1.388(3)   |
| C2   | C3   | 1.379(3)   | C21  | C22  | 1.385(3)   |
| C4   | C5   | 1.384(3)   | C23  | C24  | 1.385(3)   |
| C5   | C6   | 1.378(3)   | C24  | C25  | 1.381(3)   |
| C7   | C8   | 1.408(3)   | C26  | C27  | 1.407(2)   |
| C7   | C12  | 1.404(3)   | C26  | C31  | 1.410(2)   |
| C7   | B1   | 1.617(3)   | C26  | B2   | 1.622(3)   |
| C8   | C9   | 1.384(3)   | C27  | C28  | 1.389(3)   |
| C9   | C10  | 1.391(4)   | C28  | C29  | 1.394(3)   |
| C10  | C11  | 1.382(3)   | C29  | C30  | 1.385(3)   |
| C11  | C12  | 1.398(3)   | C30  | C31  | 1.392(3)   |
| C13  | C14  | 1.395(3)   | C32  | C33  | 1.400(3)   |

**Table S11:** Bond Lengths for [Ph<sub>2</sub>B(3-SF<sub>5</sub>)Pz<sub>2</sub>]Cu(CO).

| Atom | Atom | Length/Å   | Atom | Atom | Length/Å |
|------|------|------------|------|------|----------|
| C13  | C18  | 1.405(3)   | C32  | C37  | 1.405(3) |
| C13  | B1   | 1.611(3)   | C32  | B2   | 1.607(3) |
| C14  | C15  | 1.396(3)   | C33  | C34  | 1.396(3) |
| C15  | C16  | 1.383(4)   | C34  | C35  | 1.380(3) |
| C16  | C17  | 1.387(4)   | C35  | C36  | 1.389(3) |
| C17  | C18  | 1.393(3)   | C36  | C37  | 1.390(3) |
| Cu2  | N6   | 2.0154(15) |      |      |          |

**Table S12:** Bond Angles for [Ph<sub>2</sub>B(3-SF<sub>5</sub>)Pz<sub>2</sub>]Cu(CO).

| Atom | Atom | Atom | Angle/°   | Atom | Atom | Atom | Angle/°   |
|------|------|------|-----------|------|------|------|-----------|
| N4   | Cu1  | N2   | 92.50(6)  | C38  | Cu2  | N6   | 130.38(8) |
| C19  | Cu1  | N2   | 134.34(8) | C38  | Cu2  | N8   | 138.06(8) |
| C19  | Cu1  | N4   | 131.12(8) | C38  | Cu2  | C26  | 107.98(8) |
| F1   | S1   | F5   | 87.99(8)  | F11  | S3   | F12  | 87.74(8)  |
| F1   | S1   | C1   | 179.21(9) | F11  | S3   | F13  | 87.96(7)  |
| F2   | S1   | F1   | 87.70(8)  | F11  | S3   | F15  | 88.16(7)  |
| F2   | S1   | F3   | 89.42(9)  | F11  | S3   | C20  | 179.24(9) |
| F2   | S1   | F5   | 89.37(9)  | F12  | S3   | C20  | 91.84(8)  |
| F2   | S1   | C1   | 92.58(8)  | F13  | S3   | F12  | 90.16(8)  |
| F3   | S1   | F1   | 87.95(8)  | F13  | S3   | C20  | 92.68(8)  |
| F3   | S1   | F5   | 175.81(8) | F14  | S3   | F11  | 88.44(8)  |
| F3   | S1   | C1   | 91.31(8)  | F14  | S3   | F12  | 176.17(8) |
| F4   | S1   | F1   | 88.16(8)  | F14  | S3   | F13  | 89.99(8)  |
| F4   | S1   | F2   | 175.86(8) | F14  | S3   | F15  | 89.68(8)  |
| F4   | S1   | F3   | 90.28(10) | F14  | S3   | C20  | 91.97(8)  |
| F4   | S1   | F5   | 90.63(11) | F15  | S3   | F12  | 89.91(8)  |
| F4   | S1   | C1   | 91.55(9)  | F15  | S3   | F13  | 176.11(7) |

Supporting Information

**Table S12:** Bond Angles for [Ph<sub>2</sub>B(3-SF<sub>5</sub>)Pz<sub>2</sub>]Cu(CO).

| Atom | Atom | Atom | Angle/°    | Atom | Atom | Atom | Angle/°    |
|------|------|------|------------|------|------|------|------------|
| F5   | S1   | C1   | 92.75(9)   | F15  | S3   | C20  | 91.21(8)   |
| F6   | S2   | C4   | 179.36(8)  | F16  | S4   | C23  | 179.41(11) |
| F7   | S2   | F6   | 87.98(7)   | F17  | S4   | F16  | 87.92(9)   |
| F7   | S2   | C4   | 92.52(8)   | F17  | S4   | F19  | 176.05(9)  |
| F8   | S2   | F6   | 87.85(7)   | F17  | S4   | C23  | 92.64(9)   |
| F8   | S2   | F7   | 90.02(8)   | F18  | S4   | F16  | 87.93(8)   |
| F8   | S2   | F10  | 176.09(7)  | F18  | S4   | F17  | 89.42(11)  |
| F8   | S2   | C4   | 92.54(8)   | F18  | S4   | F19  | 89.31(11)  |
| F9   | S2   | F6   | 88.07(7)   | F18  | S4   | C23  | 91.87(8)   |
| F9   | S2   | F7   | 175.99(7)  | F19  | S4   | F16  | 88.30(9)   |
| F9   | S2   | F8   | 90.48(8)   | F19  | S4   | C23  | 91.14(9)   |
| F9   | S2   | F10  | 89.53(8)   | F20  | S4   | F16  | 88.04(8)   |
| F9   | S2   | C4   | 91.43(8)   | F20  | S4   | F17  | 90.32(12)  |
| F10  | S2   | F6   | 88.23(7)   | F20  | S4   | F18  | 175.96(9)  |
| F10  | S2   | F7   | 89.69(8)   | F20  | S4   | F19  | 90.68(12)  |
| F10  | S2   | C4   | 91.37(8)   | F20  | S4   | C23  | 92.16(9)   |
| N2   | N1   | B1   | 118.38(14) | N6   | N5   | B2   | 117.30(14) |
| C3   | N1   | N2   | 109.83(15) | C22  | N5   | N6   | 109.82(14) |
| C3   | N1   | B1   | 131.79(16) | C22  | N5   | B2   | 132.87(15) |
| N1   | N2   | Cu1  | 113.51(11) | N5   | N6   | Cu2  | 112.22(11) |
| C1   | N2   | Cu1  | 140.80(13) | C20  | N6   | Cu2  | 141.96(13) |
| C1   | N2   | N1   | 105.67(15) | C20  | N6   | N5   | 105.81(15) |
| N4   | N3   | B1   | 117.47(14) | N8   | N7   | B2   | 117.30(14) |
| C6   | N3   | N4   | 109.33(15) | C25  | N7   | N8   | 109.44(15) |
| C6   | N3   | B1   | 133.17(15) | C25  | N7   | B2   | 133.21(16) |
| N3   | N4   | Cu1  | 114.27(11) | N7   | N8   | Cu2  | 112.16(11) |
| C4   | N4   | Cu1  | 139.55(13) | C23  | N8   | Cu2  | 142.18(14) |
| C4   | N4   | N3   | 105.92(14) | C23  | N8   | N7   | 105.65(15) |
| N2   | C1   | S1   | 120.51(14) | N6   | C20  | S3   | 120.69(14) |

## Supporting Information

**Table S12:** Bond Angles for [Ph<sub>2</sub>B(3-SF<sub>5</sub>)Pz<sub>2</sub>]Cu(CO).

| Atom | Atom | Atom | Angle/°    | Atom | Atom | Atom | Angle/°    |
|------|------|------|------------|------|------|------|------------|
| N2   | C1   | C2   | 112.04(17) | N6   | C20  | C21  | 112.06(16) |
| C2   | C1   | S1   | 127.31(15) | C21  | C20  | S3   | 127.23(14) |
| C3   | C2   | C1   | 103.61(17) | C22  | C21  | C20  | 103.57(16) |
| N1   | C3   | C2   | 108.85(18) | N5   | C22  | C21  | 108.73(16) |
| N4   | C4   | S2   | 120.67(14) | N8   | C23  | S4   | 119.99(15) |
| N4   | C4   | C5   | 111.94(16) | N8   | C23  | C24  | 112.15(17) |
| C5   | C4   | S2   | 127.38(14) | C24  | C23  | S4   | 127.86(15) |
| C6   | C5   | C4   | 103.56(16) | C25  | C24  | C23  | 103.51(17) |
| N3   | C6   | C5   | 109.24(16) | N7   | C25  | C24  | 109.25(17) |
| C8   | C7   | B1   | 120.02(17) | C27  | C26  | Cu2  | 95.71(12)  |
| C12  | C7   | C8   | 116.01(18) | C27  | C26  | C31  | 116.30(16) |
| C12  | C7   | B1   | 123.96(17) | C27  | C26  | B2   | 121.19(16) |
| C9   | C8   | C7   | 122.3(2)   | C31  | C26  | Cu2  | 91.20(11)  |
| C8   | C9   | C10  | 120.1(2)   | C31  | C26  | B2   | 122.45(15) |
| C11  | C10  | C9   | 119.5(2)   | B2   | C26  | Cu2  | 85.83(10)  |
| C10  | C11  | C12  | 120.0(2)   | C28  | C27  | C26  | 122.07(18) |
| C11  | C12  | C7   | 122.10(19) | C27  | C28  | C29  | 119.98(18) |
| C14  | C13  | C18  | 116.95(18) | C30  | C29  | C28  | 119.54(18) |
| C14  | C13  | B1   | 121.33(18) | C29  | C30  | C31  | 120.10(18) |
| C18  | C13  | B1   | 121.70(17) | C30  | C31  | C26  | 121.95(17) |
| C13  | C14  | C15  | 121.6(2)   | C33  | C32  | C37  | 116.81(17) |
| C16  | C15  | C14  | 120.2(2)   | C33  | C32  | B2   | 120.52(16) |
| C15  | C16  | C17  | 119.7(2)   | C37  | C32  | B2   | 122.65(16) |
| C16  | C17  | C18  | 119.8(2)   | C34  | C33  | C32  | 121.69(18) |
| C17  | C18  | C13  | 121.8(2)   | C35  | C34  | C33  | 120.17(19) |
| O1   | C19  | Cu1  | 179.3(2)   | C34  | C35  | C36  | 119.51(18) |
| N1   | B1   | N3   | 105.47(14) | C35  | C36  | C37  | 120.22(19) |
| N1   | B1   | C7   | 108.58(15) | C36  | C37  | C32  | 121.59(19) |
| N1   | B1   | C13  | 109.94(15) | O2   | C38  | Cu2  | 172.2(2)   |



Supporting Information

**Table S12:** Bond Angles for [Ph<sub>2</sub>B(3-SF<sub>5</sub>)Pz<sub>2</sub>]Cu(CO).

| Atom | Atom | Atom | Angle/°    | Atom | Atom | Atom | Angle/°    |
|------|------|------|------------|------|------|------|------------|
| N3   | B1   | C7   | 105.71(14) | N5   | B2   | N7   | 104.66(13) |
| N3   | B1   | C13  | 109.30(15) | N5   | B2   | C26  | 108.07(14) |
| C13  | B1   | C7   | 117.15(16) | N5   | B2   | C32  | 110.90(14) |
| N6   | Cu2  | C26  | 81.34(6)   | N7   | B2   | C26  | 106.39(14) |
| N8   | Cu2  | N6   | 91.24(6)   | N7   | B2   | C32  | 110.23(14) |
| N8   | Cu2  | C26  | 79.71(6)   | C32  | B2   | C26  | 115.91(15) |

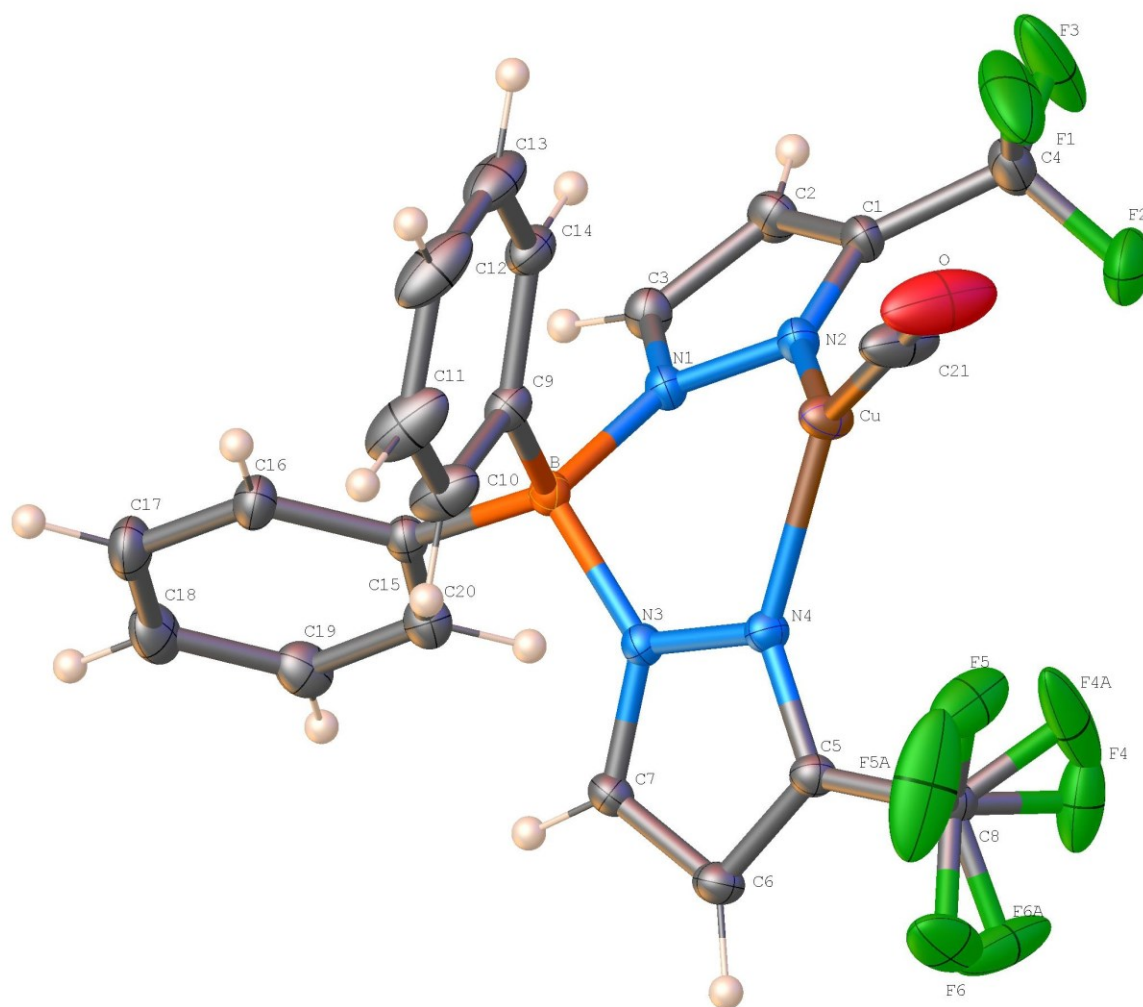

**Figure S39:** Molecular structure and atom labelling scheme of  $[\text{Ph}_2\text{B}(\text{3-CF}_3)\text{Pz}_2]\text{Cu}(\text{CO})$ .

**Table S13:** Crystal data and structure refinement for  $[\text{Ph}_2\text{B}(\text{3-CF}_3)\text{Pz}_2]\text{Cu}(\text{CO})$ .

|                     |                                                             |
|---------------------|-------------------------------------------------------------|
| Identification code | HRD8_0m_a                                                   |
| Empirical formula   | $\text{C}_{21}\text{H}_{14}\text{BCuF}_6\text{N}_4\text{O}$ |
| Formula weight      | 526.71                                                      |
| Temperature/K       | 100.0                                                       |
| Crystal system      | triclinic                                                   |

*Supporting Information*

|                                             |                                                                |
|---------------------------------------------|----------------------------------------------------------------|
| Space group                                 | P-1                                                            |
| a/Å                                         | 10.1945(6)                                                     |
| b/Å                                         | 10.2497(6)                                                     |
| c/Å                                         | 12.0937(7)                                                     |
| $\alpha$ /°                                 | 114.940(2)                                                     |
| $\beta$ /°                                  | 91.685(3)                                                      |
| $\gamma$ /°                                 | 106.275(2)                                                     |
| Volume/Å <sup>3</sup>                       | 1084.00(11)                                                    |
| Z                                           | 2                                                              |
| $\rho_{\text{calc}}$ /cm <sup>3</sup>       | 1.614                                                          |
| $\mu$ /mm <sup>-1</sup>                     | 1.081                                                          |
| F(000)                                      | 528.0                                                          |
| Crystal size/mm <sup>3</sup>                | 0.4 × 0.25 × 0.2                                               |
| Radiation                                   | Mo K $\alpha$ ( $\lambda$ = 0.71073)                           |
| 2 $\theta$ range for data collection/°      | 4.474 to 66.282                                                |
| Index ranges                                | -15 ≤ h ≤ 15, -15 ≤ k ≤ 15, -18 ≤ l ≤ 18                       |
| Reflections collected                       | 20881                                                          |
| Independent reflections                     | 8090 [ $R_{\text{int}}$ = 0.0157, $R_{\text{sigma}}$ = 0.0184] |
| Data/restraints/parameters                  | 8090/0/335                                                     |
| Goodness-of-fit on F <sup>2</sup>           | 1.094                                                          |
| Final R indexes [ $I \geq 2\sigma(I)$ ]     | $R_1$ = 0.0355, $wR_2$ = 0.0863                                |
| Final R indexes [all data]                  | $R_1$ = 0.0412, $wR_2$ = 0.0918                                |
| Largest diff. peak/hole / e Å <sup>-3</sup> | 1.04/-0.87                                                     |

**Table S14:** Bond Lengths for [Ph<sub>2</sub>B(3-CF<sub>3</sub>)Pz<sub>2</sub>]Cu(CO).

| Atom | Atom | Length/Å   | Atom | Atom | Length/Å   |
|------|------|------------|------|------|------------|
| Cu   | N2   | 1.9871(11) | C5   | C6   | 1.3927(17) |
| Cu   | N4   | 1.9838(10) | C5   | C8   | 1.4879(17) |
| Cu   | C21  | 1.8028(16) | C6   | C7   | 1.3868(17) |

Supporting Information

**Table S14:** Bond Lengths for [Ph<sub>2</sub>B(3-CF<sub>3</sub>)Pz<sub>2</sub>]Cu(CO).

| Atom | Atom | Length/Å   | Atom | Atom | Length/Å   |
|------|------|------------|------|------|------------|
| F1   | C4   | 1.318(2)   | C8   | F4A  | 1.287(9)   |
| F2   | C4   | 1.3269(19) | C8   | F5A  | 1.342(9)   |
| F3   | C4   | 1.3296(19) | C8   | F6A  | 1.306(9)   |
| F4   | C8   | 1.331(2)   | C9   | C10  | 1.4047(19) |
| F5   | C8   | 1.3167(19) | C9   | C14  | 1.4013(18) |
| F6   | C8   | 1.3241(19) | C9   | B    | 1.6227(18) |
| O    | C21  | 1.119(2)   | C10  | C11  | 1.390(2)   |
| N1   | N2   | 1.3590(14) | C11  | C12  | 1.381(3)   |
| N1   | C3   | 1.3452(16) | C12  | C13  | 1.385(3)   |
| N1   | B    | 1.5804(16) | C13  | C14  | 1.4000(19) |
| N2   | C1   | 1.3391(16) | C15  | C16  | 1.3988(17) |
| N3   | N4   | 1.3593(14) | C15  | C20  | 1.4078(17) |
| N3   | C7   | 1.3454(15) | C15  | B    | 1.6078(18) |
| N3   | B    | 1.5925(17) | C16  | C17  | 1.3969(19) |
| N4   | C5   | 1.3397(15) | C17  | C18  | 1.385(2)   |
| C1   | C2   | 1.3929(19) | C18  | C19  | 1.389(2)   |
| C1   | C4   | 1.4844(19) | C19  | C20  | 1.3934(18) |
| C2   | C3   | 1.3844(18) |      |      |            |

**Table S15:** Bond Angles for [Ph<sub>2</sub>B(3-CF<sub>3</sub>)Pz<sub>2</sub>]Cu(CO).

| Atom | Atom | Atom | Angle/°    | Atom | Atom | Atom | Angle/°    |
|------|------|------|------------|------|------|------|------------|
| N4   | Cu   | N2   | 93.93(4)   | F5   | C8   | F6   | 107.79(15) |
| C21  | Cu   | N2   | 137.21(6)  | F5   | C8   | C5   | 113.28(12) |
| C21  | Cu   | N4   | 128.47(6)  | F6   | C8   | F4   | 106.10(16) |
| N2   | N1   | B    | 119.38(9)  | F6   | C8   | C5   | 110.53(13) |
| C3   | N1   | N2   | 109.90(10) | F4A  | C8   | C5   | 115.7(4)   |
| C3   | N1   | B    | 130.01(10) | F4A  | C8   | F5A  | 105.4(10)  |
| N1   | N2   | Cu   | 114.71(8)  | F4A  | C8   | F6A  | 105.0(9)   |

## Supporting Information

**Table S15:** Bond Angles for [Ph<sub>2</sub>B(3-CF<sub>3</sub>)Pz<sub>2</sub>]Cu(CO).

| Atom | Atom | Atom | Angle/°    | Atom | Atom | Atom | Angle/°    |
|------|------|------|------------|------|------|------|------------|
| C1   | N2   | Cu   | 138.75(9)  | F5A  | C8   | C5   | 113.1(5)   |
| C1   | N2   | N1   | 105.91(10) | F6A  | C8   | C5   | 115.1(4)   |
| N4   | N3   | B    | 118.83(9)  | F6A  | C8   | F5A  | 101.0(10)  |
| C7   | N3   | N4   | 109.60(10) | C10  | C9   | B    | 119.77(11) |
| C7   | N3   | B    | 131.16(10) | C14  | C9   | C10  | 116.69(12) |
| N3   | N4   | Cu   | 114.98(7)  | C14  | C9   | B    | 123.54(11) |
| C5   | N4   | Cu   | 138.59(8)  | C11  | C10  | C9   | 121.79(15) |
| C5   | N4   | N3   | 106.42(9)  | C12  | C11  | C10  | 120.33(16) |
| N2   | C1   | C2   | 111.49(11) | C11  | C12  | C13  | 119.55(14) |
| N2   | C1   | C4   | 120.28(12) | C12  | C13  | C14  | 120.05(15) |
| C2   | C1   | C4   | 128.23(12) | C13  | C14  | C9   | 121.56(14) |
| C3   | C2   | C1   | 103.72(11) | C16  | C15  | C20  | 116.77(11) |
| N1   | C3   | C2   | 108.97(11) | C16  | C15  | B    | 121.74(11) |
| F1   | C4   | F2   | 106.16(14) | C20  | C15  | B    | 121.47(10) |
| F1   | C4   | F3   | 108.29(16) | C17  | C16  | C15  | 121.68(13) |
| F1   | C4   | C1   | 113.06(13) | C18  | C17  | C16  | 120.08(13) |
| F2   | C4   | F3   | 105.91(14) | C17  | C18  | C19  | 119.85(12) |
| F2   | C4   | C1   | 112.91(13) | C18  | C19  | C20  | 119.66(13) |
| F3   | C4   | C1   | 110.13(13) | C19  | C20  | C15  | 121.94(12) |
| N4   | C5   | C6   | 111.04(11) | O    | C21  | Cu   | 176.4(2)   |
| N4   | C5   | C8   | 120.94(11) | N1   | B    | N3   | 106.39(9)  |
| C6   | C5   | C8   | 128.00(11) | N1   | B    | C9   | 108.09(10) |
| C7   | C6   | C5   | 103.96(10) | N1   | B    | C15  | 110.10(9)  |
| N3   | C7   | C6   | 108.97(10) | N3   | B    | C9   | 106.00(9)  |
| F4   | C8   | C5   | 112.18(12) | N3   | B    | C15  | 109.36(9)  |
| F5   | C8   | F4   | 106.58(15) | C15  | B    | C9   | 116.39(10) |

**Steric maps of bis(pyrazolyl)borates in  $[\text{Ph}_2\text{B}(3\text{-(SF}_5\text{)Pz})_2]\text{Cu}(\text{L})$  and  $[\text{Ph}_2\text{B}(3\text{-(CF}_3\text{)Pz})_2]\text{Cu}(\text{L})$ ,  $\text{L} = \text{C}_2\text{H}_4$  or  $\text{CO}$** 

Computed using SambVca 2.1 for a sphere radius of 3.5 Å about the metal center, Bondi van der Waals radii scaled by a factor of 1.17, 0.10 Å mesh spacing, and including hydrogen atoms (difference in % $V_{\text{bur}}$  value was negligible ( $\leq 0.1\%$ ) between inclusion or omission of H-atoms in these molecules during calculation).<sup>10</sup> Per SambVca protocol, metal-ethylene and metal-CO moieties were removed for the calculation of steric maps and % $V_{\text{bur}}$  of bis(pyrazolyl)borate in the copper-ethylene and copper-CO complexes  $[\text{Ph}_2\text{B}(3\text{-(SF}_5\text{)Pz})_2]\text{Cu}(\text{L})$  and  $[\text{Ph}_2\text{B}(3\text{-(CF}_3\text{)Pz})_2]\text{Cu}(\text{L})$ ,  $\text{L} = \text{C}_2\text{H}_4$  or  $\text{CO}$ .

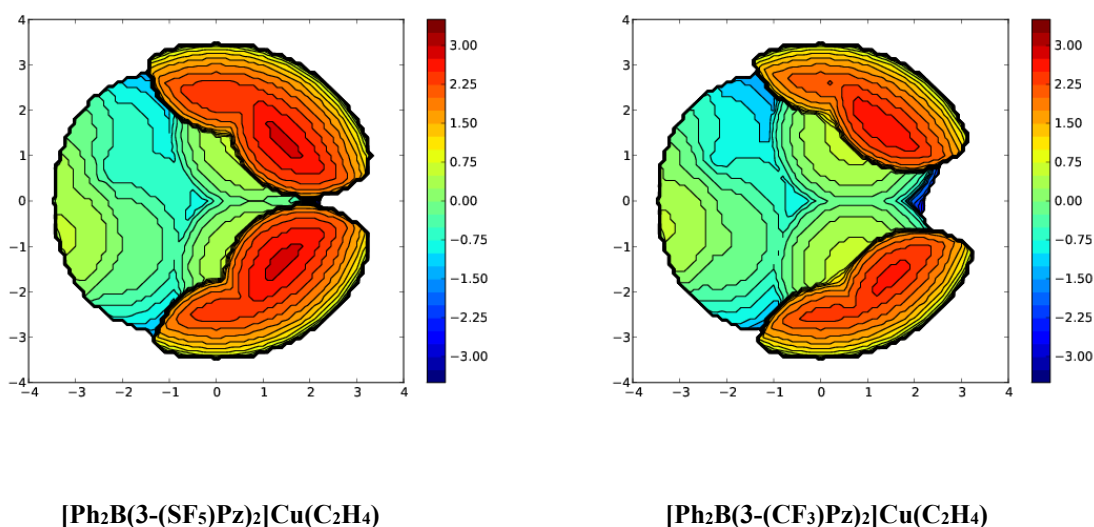

**Figure S40:** Steric maps of bis(pyrazolyl)borate ligands in  $[\text{Ph}_2\text{B}(3\text{-(SF}_5\text{)Pz})_2]\text{Cu}(\text{C}_2\text{H}_4)$  (left) and  $[\text{Ph}_2\text{B}(3\text{-(CF}_3\text{)Pz})_2]\text{Cu}(\text{C}_2\text{H}_4)$  (right) based on X-ray data. The resulting % buried volume (% $V_{\text{bur}}$ ) values are 65.6 (average of 66.1 and 65.0 for the two molecules in the asymmetric unit) and 59.5, respectively.

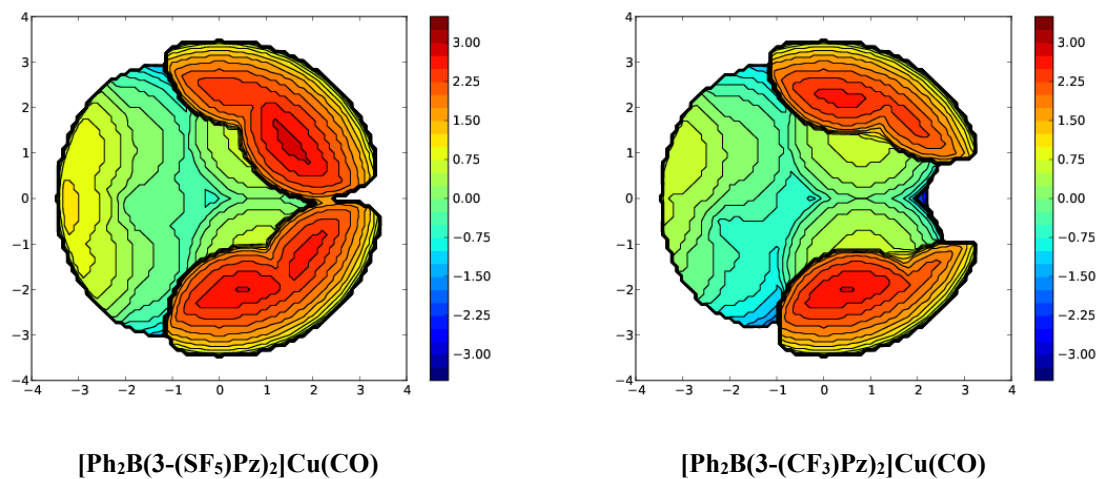

**Figure S41:** Steric maps of bis(pyrazolyl)borate ligands in [Ph<sub>2</sub>B(3-(SF<sub>5</sub>)Pz)<sub>2</sub>]Cu(CO) (left) and [Ph<sub>2</sub>B(3-(CF<sub>3</sub>)Pz)<sub>2</sub>]Cu(CO) (right) based on X-ray data. The resulting % buried volume (%V<sub>bur</sub>) values are 68.7 (average of 69.0 and 68.4 for the two molecules in the asymmetric unit) and 60.8 (fluorine atoms of one of the CF<sub>3</sub> groups of [Ph<sub>2</sub>B(3-(CF<sub>3</sub>)Pz)<sub>2</sub>]Cu(CO) show positional disorder, and only the major occupancy fluorine atoms were utilized in the calculation to avoid inflated steric bulk), respectively. For comparison, inclusion of both disorder-parts in [Ph<sub>2</sub>B(3-(CF<sub>3</sub>)Pz)<sub>2</sub>]Cu(CO) leads to a marginally higher %V<sub>bur</sub> value of 61.9.

## Computational studies

All calculations were carried out by using relativistic DFT methods employing the ADF code<sup>11</sup> with the all-electron triple- $\zeta$  Slater basis set plus the double-polarization (STO-TZ2P) basis set in conjunction with the Becke-Perdew (BP86) functional<sup>12</sup> within the generalized gradient approximation (GGA). London dispersion corrections were taken into account via the pairwise Grimme (BP86-D3) approach.<sup>13</sup> Geometry optimizations were performed without any symmetry restrain via the analytical energy gradient method implemented by Versluis and Ziegler,<sup>14</sup> with energy convergence criteria set at  $10^{-4}$  Hartree, gradient convergence criteria at  $10^{-4}$  Hartree/Å, and radial convergence of  $10^{-3}$  Å. Scalar relativistic effects were considered through the ZORA Hamiltonian.<sup>15</sup>

The interaction energy is further dissected into several chemically meaningful terms according to the Energy Decomposition Analysis (EDA) of Ziegler and Rauk,<sup>16, 17</sup>

$$\Delta E_{\text{int}} = \Delta E_{\text{Pauli}} + \Delta E_{\text{elstat}} + \Delta E_{\text{orb}} + \Delta E_{\text{disp}}$$

where  $\Delta E_{\text{Pauli}}$  term involves the electron repulsion between occupied orbitals from the different fragments.  $\Delta E_{\text{elstat}}$  and  $\Delta E_{\text{orb}}$  are related to the stabilizing electrostatic and covalent character of the interaction, respectively. The contribution from dispersion interaction ( $\Delta E_{\text{disp}}$ ) is evaluated using the pairwise correction of Grimme (D3). Bonding analysis is given in terms of bonding contributions to  $\Delta E_{\text{orb}}$  by using the Natural Orbitals for Chemical Valence extension of the EDA method (EDA-NOCV),<sup>18</sup> resulting in deformation densities accounting for the individual in- and out-flow of charges related to the bonding pattern.

**Table S16:** Calculated IR  $\bar{\nu}(\text{C}=\text{C})$  stretching frequencies ( $\text{cm}^{-1}$ ) and selected bond distances from optimized structures (Å)

| Parameter                      | $[\text{Ph}_2\text{B}(3-(\text{SF}_5)\text{Pz})_2]\text{Cu}(\text{C}_2\text{H}_4)$ | $[\text{Ph}_2\text{B}(3-(\text{CF}_3)\text{Pz})_2]\text{Cu}(\text{C}_2\text{H}_4)$ | $[\text{Ph}_2\text{B}(3-(\text{CH}_3)\text{Pz})_2]\text{Cu}(\text{C}_2\text{H}_4)$ |
|--------------------------------|------------------------------------------------------------------------------------|------------------------------------------------------------------------------------|------------------------------------------------------------------------------------|
| $\bar{\nu}(\text{C}=\text{C})$ | 1516.3                                                                             | 1513.5                                                                             | 1509.3                                                                             |
| C=C                            | 1.383                                                                              | 1.386                                                                              | 1.389                                                                              |
| Cu-C                           | 2.047                                                                              | 2.045                                                                              | 2.029                                                                              |
| Cu-C                           | 2.050                                                                              | 2.051                                                                              | 2.034                                                                              |



**Table S17:** Calculated proton affinities of  $[\text{Ph}_2\text{B}(3\text{-(R)Pz})_2]^-$  ligands with R = -SF<sub>5</sub>, -CF<sub>3</sub>, and -CH<sub>3</sub>. Values in kJ·mol<sup>-1</sup>.

| Parameter       | $[\text{Ph}_2\text{B}(3\text{-(SF}_5\text{)Pz})_2]^-$ | $[\text{Ph}_2\text{B}(3\text{-(CF}_3\text{)Pz})_2]^-$ | $[\text{Ph}_2\text{B}(3\text{-(CH}_3\text{)Pz})_2]^-$ |
|-----------------|-------------------------------------------------------|-------------------------------------------------------|-------------------------------------------------------|
| proton affinity | 936.5                                                 | 944.1                                                 | 1016.5                                                |

For comparison with experimental data, calculated and experimentally determined proton affinities for 3,5-(CH<sub>3</sub>)<sub>2</sub>PzH are 967.2 and 933.5 kJ·mol<sup>-1</sup> respectively.<sup>19</sup>

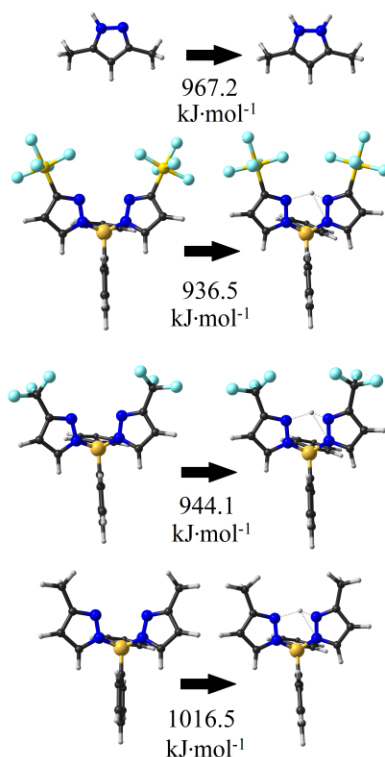

From top to bottom, the figures represent:

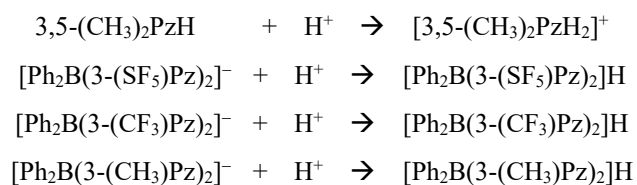

**Figure 42.** Proton affinities (PA) were calculated for equations given above in which proton affinity is defined as the negative of the difference in energy between the protonated and non-protonated forms for hypothetical gas-phase protonation reactions ( $\text{PA} = -E_{\text{PA}}$ ),

where  $E_{\text{PA}} = E(\text{protonated acceptor}) - [E(\text{acceptor}) + E(\text{H}^+)]$

**Table S18.** Energy decomposition analyses for the C<sub>2</sub>H<sub>4</sub>-Cu interaction, for different [Ph<sub>2</sub>B(3-(R)Pz)<sub>2</sub>]Cu(C<sub>2</sub>H<sub>4</sub>) complexes, in which R = -SF<sub>5</sub>, -CF<sub>3</sub>, and -CH<sub>3</sub>. Values in kcal·mol<sup>-1</sup>. In addition the contribution from both π<sub>2</sub>\*-backbonding and σ-donation is given accounting for π<sub>2</sub>\*-C<sub>2</sub>H<sub>4</sub> ← Cu and π<sub>1</sub>-C<sub>2</sub>H<sub>4</sub> → Cu bonding schemes, respectively. In addition, charge distribution analysis (*q*) obtained from Hirshfeld charge analysis is given.

| Parameter                                           | [Ph <sub>2</sub> B(3-(SF <sub>5</sub> )Pz) <sub>2</sub> ]Cu(C <sub>2</sub> H <sub>4</sub> ) | [Ph <sub>2</sub> B(3-(CF <sub>3</sub> )Pz) <sub>2</sub> ]Cu(C <sub>2</sub> H <sub>4</sub> ) | [Ph <sub>2</sub> B(3-(CH <sub>3</sub> )Pz) <sub>2</sub> ]Cu(C <sub>2</sub> H <sub>4</sub> ) |                    |        |                    |
|-----------------------------------------------------|---------------------------------------------------------------------------------------------|---------------------------------------------------------------------------------------------|---------------------------------------------------------------------------------------------|--------------------|--------|--------------------|
| ΔE <sub>int</sub>                                   | -44.9                                                                                       | -45.9                                                                                       | -45.2                                                                                       |                    |        |                    |
| ΔE <sub>Pauli</sub>                                 | 114.0                                                                                       | 112.5                                                                                       | 125.4                                                                                       |                    |        |                    |
| ΔE <sub>disp</sub>                                  | -6.5                                                                                        | 4.1% <sup>a</sup>                                                                           | -5.6                                                                                        | 3.5% <sup>a</sup>  | -5.3   | 3.1% <sup>a</sup>  |
| ΔE <sub>elstat</sub>                                | -95.2                                                                                       | 59.9% <sup>a</sup>                                                                          | -95.0                                                                                       | 59.9% <sup>a</sup> | -102.1 | 59.9% <sup>a</sup> |
| ΔE <sub>orb</sub>                                   | -57.2                                                                                       | 36.0% <sup>a</sup>                                                                          | -57.9                                                                                       | 36.6% <sup>a</sup> | -63.2  | 37.1% <sup>a</sup> |
| π <sub>1</sub> -C <sub>2</sub> H <sub>4</sub> → Cu  | -17.1                                                                                       | 29.9% <sup>b</sup>                                                                          | -16.5                                                                                       | 28.5% <sup>b</sup> | -15.5  | 24.5% <sup>b</sup> |
| π <sub>2</sub> *-C <sub>2</sub> H <sub>4</sub> ← Cu | -31.4                                                                                       | 54.9% <sup>b</sup>                                                                          | -33.5                                                                                       | 57.9% <sup>b</sup> | -40.2  | 63.7% <sup>b</sup> |
| ΔE <sub>orb</sub> <sup>rest</sup>                   | -8.7                                                                                        |                                                                                             | -7.8                                                                                        |                    | -7.5   |                    |
| <sup>c</sup> Popul. π <sub>1</sub>                  | 1.82                                                                                        |                                                                                             | 1.83                                                                                        |                    | 1.85   |                    |
| <sup>c</sup> Popul. π <sub>2</sub> *                | 0.22                                                                                        |                                                                                             | 0.27                                                                                        |                    | 0.30   |                    |
| <i>q</i> <sub>L</sub>                               | -0.28                                                                                       |                                                                                             | -0.28                                                                                       |                    | -0.24  |                    |
| <i>q</i> <sub>Cu</sub>                              | 0.33                                                                                        |                                                                                             | 0.34                                                                                        |                    | 0.34   |                    |
| <i>q</i> (C <sub>2</sub> H <sub>4</sub> )           | -0.05                                                                                       |                                                                                             | -0.06                                                                                       |                    | -0.10  |                    |

<sup>a</sup>Percentage contribution to the total attractive interactions ΔE<sub>elstat</sub> + ΔE<sub>orb</sub> + ΔE<sub>disp</sub>.

<sup>b</sup>Percentage contribution to the total orbital interactions ΔE<sub>orb</sub>.

<sup>c</sup>Population in a.u. for ethylene π<sub>1</sub> and π<sub>2</sub>\* orbitals in the resulting complex.

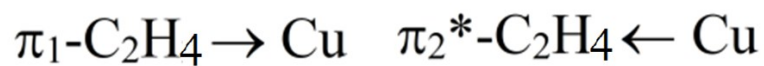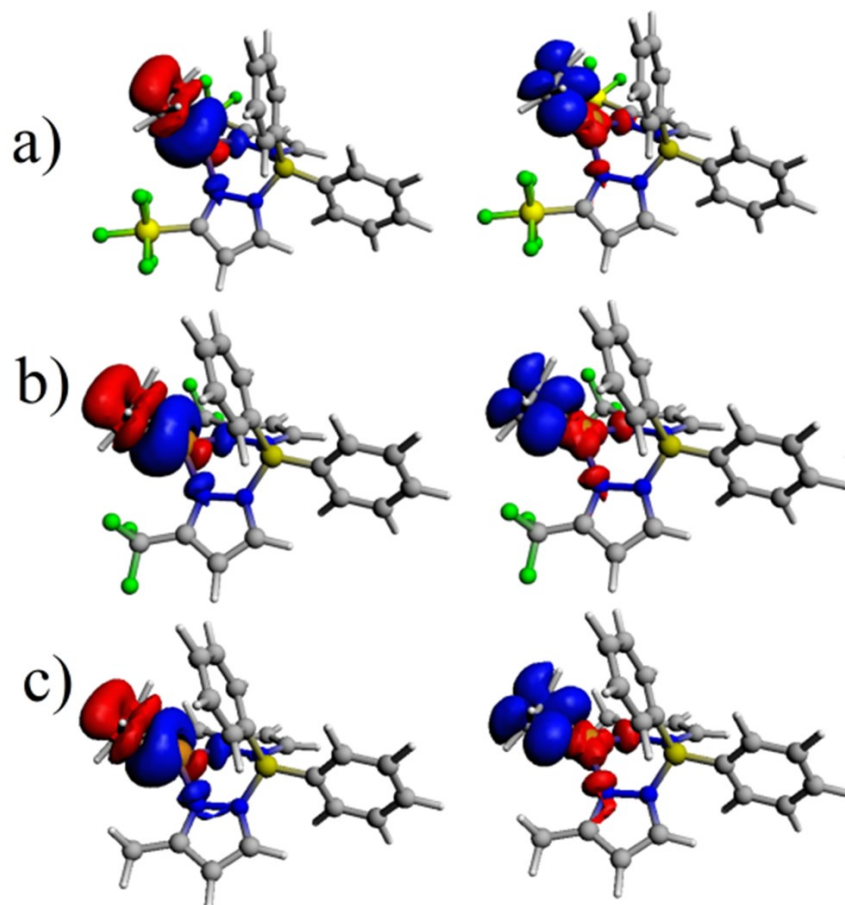

**Figure S43:** Selected deformation densities from the NOCV-EDA analysis, for  $[\text{Ph}_2\text{B}(\mathbf{3}\text{-(CF}_3\text{)Pz})_2]\text{Cu}(\text{C}_2\text{H}_4)$  (a),  $[\text{Ph}_2\text{B}(\mathbf{3}\text{-(SF}_5\text{)Pz})_2]\text{Cu}(\text{C}_2\text{H}_4)$  (b), and  $[\text{Ph}_2\text{B}(\mathbf{3}\text{-(CH}_3\text{)Pz})_2]\text{Cu}(\text{C}_2\text{H}_4)$  (c), accounting for  $\sigma$ -donation (left) and  $\pi$ -backbonding (right) in the formation of ethylene-copper complexes. Charge flow from red to blue.

**Table S19:** Energy decomposition analyses for the C<sub>2</sub>H<sub>4</sub>-Cu and C<sub>2</sub>H<sub>4</sub>-Ni interaction for isoelectronic [H<sub>2</sub>B(3-(CH<sub>3</sub>)Pz)<sub>2</sub>]Cu(C<sub>2</sub>H<sub>4</sub>) (**Cu-BH<sub>2</sub>**) and [H<sub>2</sub>C(3-(CH<sub>3</sub>)Pz)<sub>2</sub>]Ni(C<sub>2</sub>H<sub>4</sub>) (**Ni-CH<sub>2</sub>**) complexes. Values in kcal·mol<sup>-1</sup>. In addition, the contribution from both π<sub>2</sub><sup>\*</sup>-backbonding and σ-donation is given accounting for π<sub>2</sub><sup>\*</sup>-C<sub>2</sub>H<sub>4</sub> ← Cu/Ni and π<sub>1</sub>-C<sub>2</sub>H<sub>4</sub> → Cu/Ni bonding schemes, respectively. In addition, charge distribution analysis (*q*) obtained from Hirshfeld charge analysis (where L = [H<sub>2</sub>B(3-(CH<sub>3</sub>)Pz)<sub>2</sub>] or [H<sub>2</sub>C(3-(CH<sub>3</sub>)Pz)<sub>2</sub>] fragment) and calculated  $\bar{\nu}(\text{C}=\text{C})$  (in cm<sup>-1</sup>) are also given.

**This calculation was performed to compare the π-backbonding and σ-donation components of closely related, Cu(I) and Ni(0) systems in their ethylene complexes.**

| Parameter                                                          | [H <sub>2</sub> B(3-(CH <sub>3</sub> )Pz) <sub>2</sub> ]Cu(C <sub>2</sub> H <sub>4</sub> ) |                    | [H <sub>2</sub> C(3-(CH <sub>3</sub> )Pz) <sub>2</sub> ]Ni(C <sub>2</sub> H <sub>4</sub> ) |                    |
|--------------------------------------------------------------------|--------------------------------------------------------------------------------------------|--------------------|--------------------------------------------------------------------------------------------|--------------------|
| ΔE <sub>int</sub>                                                  | -44.1                                                                                      |                    | -78.6                                                                                      |                    |
| ΔE <sub>Pauli</sub>                                                | 123.1                                                                                      |                    | 173.4                                                                                      |                    |
| ΔE <sub>disp</sub>                                                 | -7.2                                                                                       | 4.3% <sup>a</sup>  | -7.4                                                                                       | 2.9% <sup>a</sup>  |
| ΔE <sub>elstat</sub>                                               | -98.7                                                                                      | 59.1% <sup>a</sup> | -137.2                                                                                     | 54.4% <sup>a</sup> |
| ΔE <sub>orb</sub>                                                  | -61.2                                                                                      | 36.6% <sup>a</sup> | -107.5                                                                                     | 42.7% <sup>a</sup> |
| π <sub>1</sub> -C <sub>2</sub> H <sub>4</sub> → Cu/Ni              | -15.6                                                                                      | 25.5% <sup>b</sup> | -13.6                                                                                      | 12.7% <sup>b</sup> |
| π <sub>2</sub> <sup>*</sup> -C <sub>2</sub> H <sub>4</sub> ← Cu/Ni | -39.0                                                                                      | 63.6% <sup>b</sup> | -86.8                                                                                      | 80.7% <sup>b</sup> |
| ΔE <sub>orb</sub> <sup>rest</sup>                                  | -6.7                                                                                       | 10.9% <sup>b</sup> | -7.1                                                                                       | 6.6% <sup>b</sup>  |
| <i>q</i> <sub>L</sub>                                              | -0.28                                                                                      |                    | 0.12                                                                                       |                    |
| <i>q</i> <sub>Cu</sub> / <i>q</i> <sub>Ni</sub>                    | 0.36                                                                                       |                    | 0.17                                                                                       |                    |
| <i>q</i> (C <sub>2</sub> H <sub>4</sub> )                          | -0.08                                                                                      |                    | -0.29                                                                                      |                    |
| $\bar{\nu}(\text{C}=\text{C})$ Calc.                               | 1513.9                                                                                     |                    | 1458.3                                                                                     |                    |

<sup>a</sup>Percentage contribution to the total attractive interactions ΔE<sub>elstat</sub> + ΔE<sub>orb</sub> + ΔE<sub>disp</sub>.

<sup>b</sup>Percentage contribution to the total orbital interactions ΔE<sub>orb</sub>.

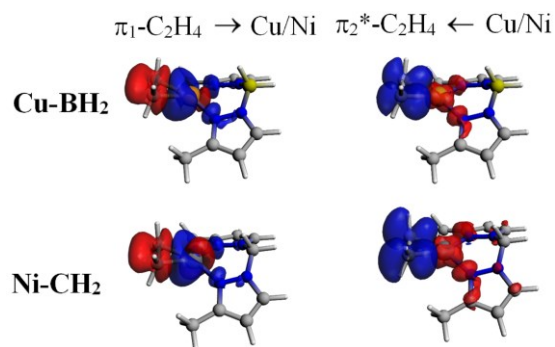

**Figure S44:** Selected deformation densities from the NOCV-EDA analysis for C<sub>2</sub>H<sub>4</sub>-Cu and C<sub>2</sub>H<sub>4</sub>-Ni interaction for the isoelectronic [H<sub>2</sub>B(3-(CH<sub>3</sub>)Pz)<sub>2</sub>]Cu(C<sub>2</sub>H<sub>4</sub>) (**Cu-BH<sub>2</sub>**) and [H<sub>2</sub>C(3-(CH<sub>3</sub>)Pz)<sub>2</sub>]Ni(C<sub>2</sub>H<sub>4</sub>) (**Ni-CH<sub>2</sub>**) complexes. Charge flow from red to blue.

**Table S20:** Energy decomposition analyses for the Cu-CO interaction, for different  $[\text{Ph}_2\text{B}(3\text{-(R)Pz})_2]\text{Cu}(\text{CO})$  complexes, with R= -SF<sub>5</sub>, -CF<sub>3</sub>, and -CH<sub>3</sub>. Values in kcal·mol<sup>-1</sup>. In addition the contribution from both  $\parallel 2\pi^*$ - and  $\perp 2\pi^*$ -backbonding, and  $3\sigma \rightarrow \text{Cu}$  donation are given. In addition, charge distribution analysis ( $q$ ) obtained from Hirshfeld charge analysis (where L =  $[\text{Ph}_2\text{B}(3\text{-(R)Pz})_2]$  fragment) and calculated  $\bar{\nu}(\text{CO})$  (in cm<sup>-1</sup>) are also given.

| Parameter                                         | $[\text{Ph}_2\text{B}(3\text{-(SF}_5\text{)Pz})_2]$ |                    | $[\text{Ph}_2\text{B}(3\text{-(CF}_3\text{)Pz})_2]$ |                    | $[\text{Ph}_2\text{B}(3\text{-(CH}_3\text{)Pz})_2]$ |                    |
|---------------------------------------------------|-----------------------------------------------------|--------------------|-----------------------------------------------------|--------------------|-----------------------------------------------------|--------------------|
|                                                   | Cu(CO)                                              |                    | Cu(CO)                                              |                    | Cu(CO)                                              |                    |
| $\Delta E_{\text{int}}$                           | -39.9                                               |                    | -39.8                                               |                    | -40.9                                               |                    |
| $\Delta E_{\text{Pauli}}$                         | 116.1                                               |                    | 118.6                                               |                    | 125.2                                               |                    |
| $\Delta E_{\text{disp}}$                          | -3.9                                                | 2.5% <sup>a</sup>  | -3.2                                                | 2.0% <sup>a</sup>  | -2.7                                                | 1.6% <sup>a</sup>  |
| $\Delta E_{\text{elstat}}$                        | -95.6                                               | 61.2% <sup>a</sup> | -97.2                                               | 61.3% <sup>a</sup> | -100.4                                              | 60.5% <sup>a</sup> |
| $\Delta E_{\text{orb}}$                           | -56.6                                               | 36.3% <sup>a</sup> | -58.1                                               | 36.7% <sup>a</sup> | -62.9                                               | 37.9% <sup>a</sup> |
| $3\sigma\text{-CO} \rightarrow \text{Cu}$         | -14.6                                               | 25.8% <sup>b</sup> | -14.1                                               | 24.3% <sup>b</sup> | -14.2                                               | 22.6% <sup>b</sup> |
| $\parallel 2\pi^*\text{-CO} \leftarrow \text{Cu}$ | -18.3                                               | 32.4% <sup>b</sup> | -19.7                                               | 33.9% <sup>b</sup> | -23.6                                               | 37.5% <sup>b</sup> |
| $\perp 2\pi^*\text{-CO} \leftarrow \text{Cu}$     | -13.1                                               | 23.2% <sup>b</sup> | -13.8                                               | 23.7% <sup>b</sup> | -15.1                                               | 24.0% <sup>b</sup> |
| $\Delta E_{\text{orb}}^{\text{rest}}$             | -10.6                                               | 18.6% <sup>b</sup> | -10.5                                               | 18.1% <sup>b</sup> | -10.0                                               | 15.9% <sup>b</sup> |
|                                                   |                                                     |                    |                                                     |                    |                                                     |                    |
| $q_{\text{L}}$                                    | -0.21                                               |                    | -0.21                                               |                    | -0.20                                               |                    |
| $q_{\text{Cu}}$                                   | 0.31                                                |                    | 0.32                                                |                    | 0.34                                                |                    |
| $q(\text{CO})$                                    | -0.10                                               |                    | -0.11                                               |                    | -0.14                                               |                    |
|                                                   |                                                     |                    |                                                     |                    |                                                     |                    |
| $\bar{\nu}(\text{CO})$ Calc.                      | 2110.0                                              |                    | 2099.0                                              |                    | 2080.3                                              |                    |
| $\bar{\nu}(\text{CO})$ Exp.                       | 2121                                                |                    | 2117                                                |                    |                                                     |                    |

<sup>a</sup>Percentage contribution to the total attractive interactions  $\Delta E_{\text{elstat}} + \Delta E_{\text{orb}} + \Delta E_{\text{disp}}$ .

<sup>b</sup>Percentage contribution to the total orbital interactions  $\Delta E_{\text{orb}}$ .

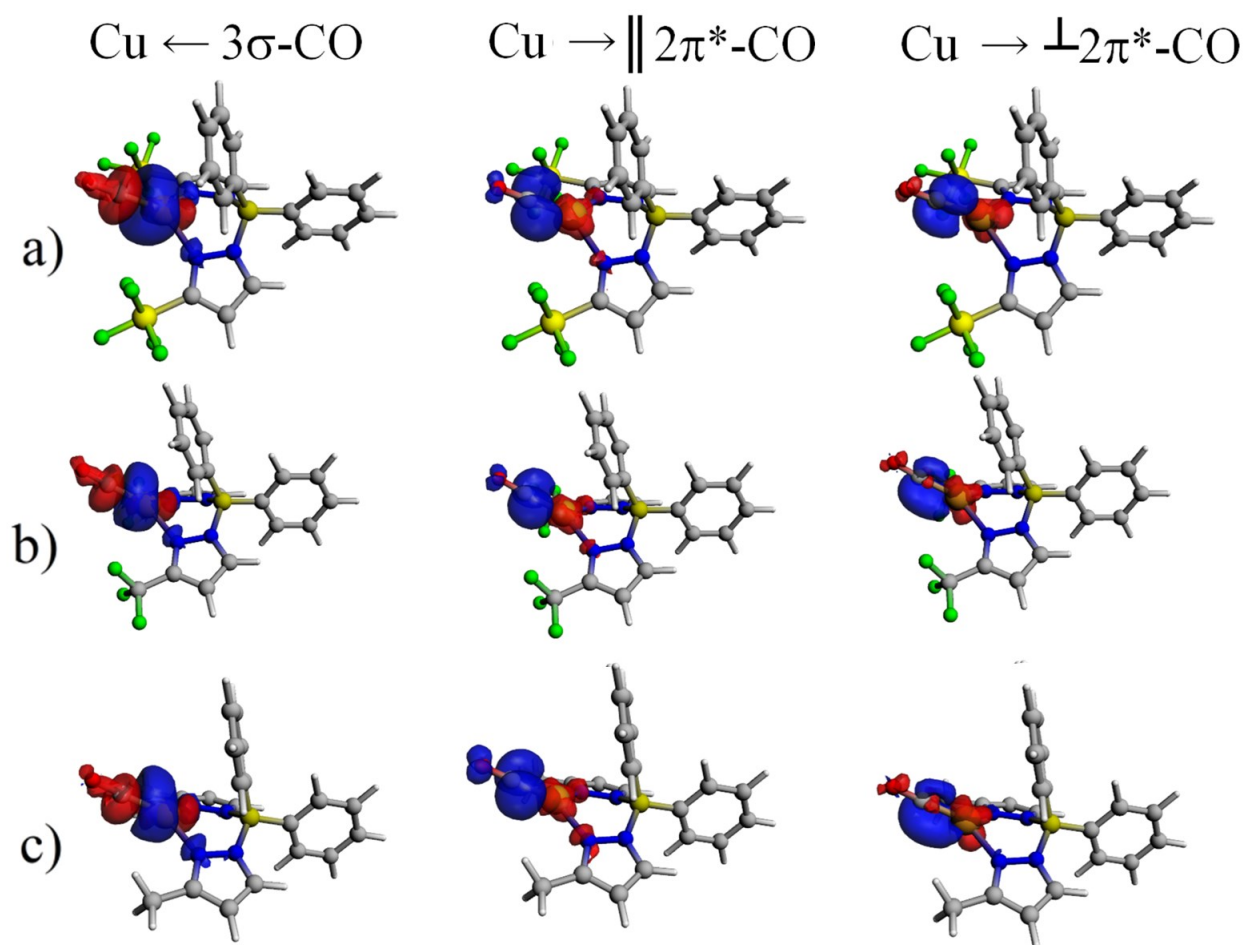

**Figure S45:** Selected deformation densities from the NOCV-EDA analysis, for  $[\text{Ph}_2\text{B}(3\text{-(SF}_5\text{)Pz})_2]\text{Cu}(\text{CO})$  (**a**),  $[\text{Ph}_2\text{B}(3\text{-(CF}_3\text{)Pz})_2]\text{Cu}(\text{CO})$  (**b**), and  $[\text{Ph}_2\text{B}(3\text{-(CH}_3\text{)Pz})_2]\text{Cu}(\text{CO})$  (**c**) accounting for  $\sigma$ -donation, and perpendicular and parallel in relation to the Cu-N<sub>2</sub> plane  $\pi$ -backbonding in the formation of copper-CO complexes. Charge flow from red to blue.

**Thermochemical parameters for C<sub>2</sub>H<sub>4</sub> replacement by CO at 298 K. values in kcal·mol<sup>-1</sup>.**

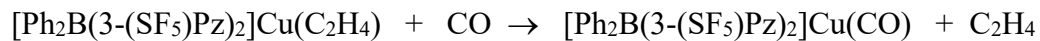

|                          |      |
|--------------------------|------|
| $\Delta G^{298\text{K}}$ | 1.30 |
| $\Delta H$               | 1.59 |
| $T\Delta S$              | 0.29 |

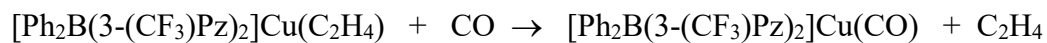

|                          |      |
|--------------------------|------|
| $\Delta G^{298\text{K}}$ | 0.59 |
| $\Delta H$               | 3.47 |
| $T\Delta S$              | 2.87 |

## References

1. S. Hyde, J. Veliks, B. Liégault, D. Grassi, M. Taillefer and V. Gouverneur, *Angewandte Chemie International Edition*, 2016, **55**, 3785-3789.
2. A. J. Lupinetti, S. H. Strauss and G. Frenking, in *Progress in Inorganic Chemistry*, 2001, DOI: <https://doi.org/10.1002/9780470166512.ch1>, pp. 1-112.
3. C. W. Tullock, D. D. Coffman and E. L. Muetterties, *Journal of the American Chemical Society*, 1964, **86**, 357-361.
4. J. A. Flores, V. Badarinarayana, S. Singh, C. J. Lovely and H. V. R. Dias, *Dalton Transactions*, 2009, DOI: 10.1039/B911981G, 7648-7652.
5. P. K. Mykhailiuk, S. Afonin, A. S. Ulrich and I. V. Komarov, *Synthesis*, 2008, **2008**, 1757-1760.
6. L. Krause, R. Herbst-Irmer, G. M. Sheldrick and D. Stalke, *Journal of Applied Crystallography*, 2015, **48**, 3-10.
7. G. Sheldrick, *Acta Crystallographica Section A*, 2015, **71**, 3-8.
8. G. Sheldrick, *Acta Crystallographica Section C*, 2015, **71**, 3-8.
9. O. V. Dolomanov, L. J. Bourhis, R. J. Gildea, J. A. K. Howard and H. Puschmann, *Journal of Applied Crystallography*, 2009, **42**, 339-341.
10. L. Falivene, Z. Cao, A. Petta, L. Serra, A. Poater, R. Oliva, V. Scarano and L. Cavallo, *Nature Chemistry*, 2019, **11**, 872-879.
11. Amsterdam Density Functional (ADF 2019) Code, Theoretical Chemistry, Vrije Universiteit, Amsterdam, The Netherlands, <http://www.scm.com>.
12. A. D. Becke, *Physical Review A*, 1988, **38**, 3098-3100.
13. S. Grimme, *WIREs Computational Molecular Science*, 2011, **1**, 211-228.
14. L. Versluis and T. Ziegler, *The Journal of Chemical Physics*, 1988, **88**, 322-328.
15. E. v. Lenthe, E. J. Baerends and J. G. Snijders, *The Journal of Chemical Physics*, 1994, **101**, 9783-9792.
16. M. v. Hopffgarten and G. Frenking, *WIREs Computational Molecular Science*, 2012, **2**, 43-62.
17. T. Ziegler and A. Rauk, *Theoretica chimica acta*, 1977, **46**, 1-10.
18. M. P. Mitoraj, A. Michalak and T. Ziegler, *Journal of Chemical Theory and Computation*, 2009, **5**, 962-975.
19. E. P. L. Hunter and S. G. Lias, *Journal of Physical and Chemical Reference Data*, 1998, **27**, 413-656.
